# Supplementary material for: Photoelectric properties of aromatic triangular tri-palladium complexes and their catalytic applications in the Suzuki–Miyaura coupling reaction
Source: Royal Society of Chemistry journal article supplement (doi:10.1039/d1dt01597d), 2021-01-01
Supplement: d1dt01597d1.pdf [file d1dt01597d1.pdf]

## **Supporting Information**

### **Photoelectric properties for aromatic triangular tri-palladium complexes and their catalytic applications in Suzuki-Miyaura coupling reaction**

- 1. General remarks**
- 2. Synthesis of catalysts 1-4**
- 3. Photochemical and electrochemical properties of triangular tri-palladium complexes 2-4**
- 4. Triangular tri-palladium complexes catalyzed Suzuki reactions**
- 5. Reaction condition screening of 1-catalyzed coupling reaction of 4-methoxy-1-bromobenzene**
- 6. Synthesis of 2-[1,1'-Biphenyl]-2-ylbenzothiazole**
- 7. GC/GC-MS data of reactions**
- 8. Mechanism investigation**
- 9. NMR spectra**
- 10. References**

## 1. General Remarks

All reagents were purchased from commercial sources. Chloroform was dewatered using a dewatering system, but it did not need to be treated with bases. Reactions and filtrations were carried out under N<sub>2</sub> using standard Schlenk technique. <sup>1</sup>H NMR spectra and <sup>13</sup>C NMR spectra were recorded at 300K on a Varian spectrometer (500M) using TMS as internal standard (0.00 ppm for <sup>1</sup>H NMR and 77.00 ppm for <sup>13</sup>C NMR for CDCl<sub>3</sub>). <sup>13</sup>C NMR spectra were recorded at 126 MHz. For <sup>31</sup>P NMR, H<sub>3</sub>PO<sub>4</sub> was used as external standards (0.00 ppm). <sup>19</sup>F NMR spectra were recorded at 471 MHz. Cyclic voltammetry experiments were performed on an electrochemical workstation (CHI 760C) with 0.1 M <sup>n</sup>Bu<sub>4</sub>NPF<sub>6</sub> as supporting electrolyte. The reference electrode used in the CV experiment was an Ag/AgCl electrode, the working electrode was a glassy carbon electrode, and the auxiliary electrode was a platinum wire. CV data were referenced relative to the ferrocene/ferrocenium couple. The photoluminescence spectra were measured using a steady state transient fluorescence spectrometer (FLS1000). Exact masses were recorded on a high resolution tandem time LC/MS instrument (G2-XSQTOF Mass Spectrometry). Most of the coupling reactions were qualitative by GC-MS (Agilent Technologies 7000D) and quantified by GC (GC-2014C).

## 2. Synthesis of catalysts 1-4

Under nitrogen, Pd(dba)<sub>2</sub> (115 mg, 0.2 mmol, 1 equiv.) and freshly degassed CHCl<sub>3</sub> (20 mL) were sequentially added to the Schlenk bottle that had been dried at high temperature. After Pd(dba)<sub>2</sub> was completely dissolved, the required phosphine (0.2 mmol, 1 equiv.) and disulfide/diselenide (0.1 mmol, 0.5 equiv.) were added under N<sub>2</sub>. The resulting mixture was stirred at room temperature for 2 hours until the solution turned deep red. Then silver salt (0.067 mmol, 0.33 equiv.) was introduced under N<sub>2</sub>, and the solution was stirred at room temperature in the dark for 1 hour. After the reaction was complete, the mixture was filtered through a pad of celite and the solvent was removed under vacuum. The obtained dark red solid was dissolved in

1 mL of  $\text{CHCl}_3$  and precipitated with excess n-hexane (1:30 v:v). The yellow solution was removed through a bidirectional needle and the remained solid was dried under vacuum. This operation was repeated 3 times to completely remove the by-products leaving the pure  $[\text{Pd}_3]^+$  as a red/orange solid. The characterization of the four complexes were consistent with the relevant literatures.<sup>1-3</sup>

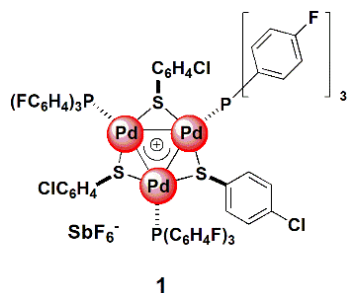

Red solid, 117 mg, 92% yield.  $^1\text{H}$  NMR (500 MHz, Chloroform-*d*)  $\delta$  7.18 – 7.07 (m, 18H), 6.89 (t,  $J = 8.5$  Hz, 18H), 6.73 (d,  $J = 8.1$  Hz, 6H), 6.32 (d,  $J = 8.0$  Hz, 6H).  $^{13}\text{C}$  NMR (126 MHz, Chloroform-*d*)  $\delta$  188.95, 143.34, 134.86, 130.51, 128.99, 128.41, 125.48, 116.29.  $^{31}\text{P}$  NMR (202 MHz, Chloroform-*d*)  $\delta$  14.10.

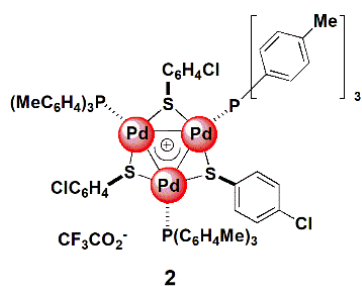

Orange solid, 94 mg, 97% yield.  $^1\text{H}$  NMR (500 MHz, Chloroform-*d*)  $\delta$  7.05 – 6.89 (m, 36H), 6.58 (d,  $J = 8.2$  Hz, 6H), 6.16 (d,  $J = 8.3$  Hz, 6H), 2.32 (s, 27H).  $^{13}\text{C}$  NMR (126 MHz, Chloroform-*d*)  $\delta$  140.97, 135.81, 134.85, 133.47, 133.35, 129.01, 127.95, 21.34.  $^{31}\text{P}$  NMR (202 MHz, Chloroform-*d*)  $\delta$  15.24.

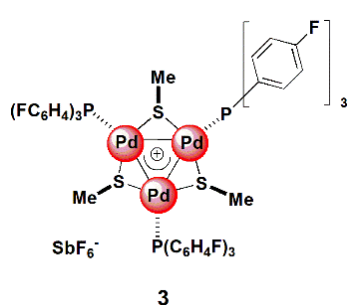

Orange solid, 95 mg, 86% yield.  $^1\text{H}$  NMR (500 MHz, Chloroform-*d*)  $\delta$  7.49 – 7.46 (m, 18H), 7.15 (t,  $J = 8.5$  Hz, 18H), 1.16 (s, 9H).  $^{13}\text{C}$  NMR (126 MHz, Chloroform-*d*)  $\delta$  165.46, 163.43, 136.12, 116.36, 76.76, 17.63.  $^{31}\text{P}$  NMR (202 MHz, Chloroform-*d*)  $\delta$  14.14.

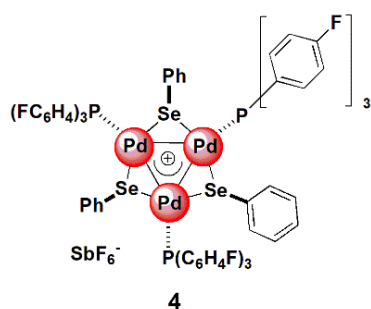

Product was purified on silica gel (acetone/hexane = 1/2). Dark red solid, 54 mg, 51% yield.  $^1\text{H}$  NMR (500 MHz, Chloroform-*d*):  $\delta$  7.57-7.31 (m, 18H), 7.23 (t,  $J = 7.6$  Hz, 3H), 6.98 (t,  $J = 8.5$  Hz, 18H), 6.91 (t,  $J = 7.6$  Hz, 6H), 6.28 (d,  $J = 7.6$  Hz, 6H).  $^{13}\text{C}$  NMR (126 MHz, Chloroform-*d*):  $\delta$  165.0, 137.8, 137.3, 135.8, 129.4, 129.0, 128.4, 116.4.

### 3. Photochemical and electrochemical properties of triangular tri-palladium complexes 2-4

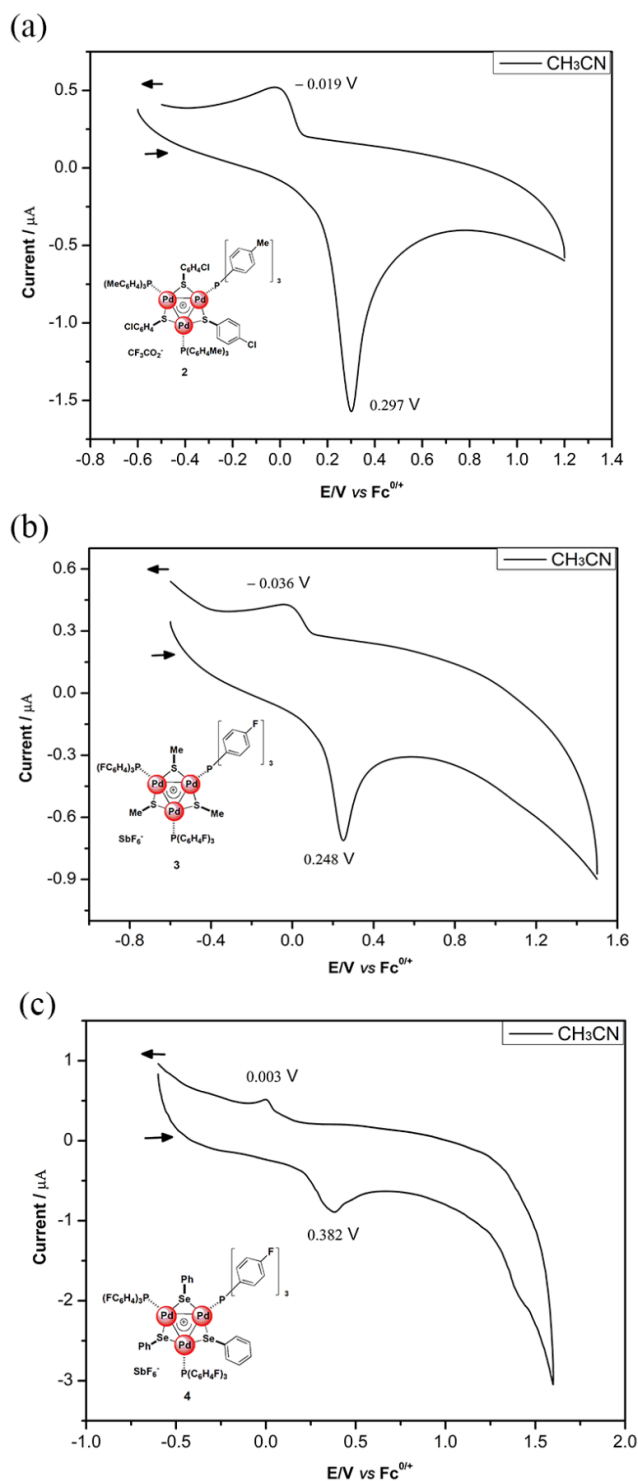

Fig. S1 Cyclic voltammogram of (a) complex **2**, (b) complex **3**, (c) complex **4**. Supporting electrolyte: nBu<sub>4</sub>NPF<sub>6</sub> (0.1M); working electrodes: glassy carbon electrodes; counter electrodes: Pt; reference electrode: Ag/AgCl; scan rate: 0.200 V s<sup>-1</sup>; solvent: CH<sub>3</sub>CN; temperature: 298K; internal reference: Fe(Cp\*)<sub>2</sub>

The investigations of the cyclic voltametric properties of  $[\text{Pd}_3]^+$  (**2**, **3**, **4**) were operated under electrochemical conditions. In general, the redox potential of  $[\text{Pd}_3]^+$  was referenced vs an Ag/AgCl electrode with the FcH/FcH<sup>+</sup> redox couple as an internal calibrant. When the cyclic voltammogram was carried out in CH<sub>3</sub>CN with nBu<sup>4</sup>NPF<sub>6</sub> as the supporting electrolyte (Fig. S1), The CV of **2** showed one quasi-reversible wave ( $E_{1/2}=0.139$  V). This shows that the electronic effect of the substituent on the phosphine ligand has little effect and the Pd<sup>+</sup>/Pd<sup>2+</sup> redox process in **2** was reversible. The cyclic voltammogram of **3** and **4** also showed quasi-reversible waves (**3**:  $E_{1/2}=0.109$  V; **4**:  $E_{1/2}=0.190$  V). It can be concluded that  $[\text{Pd}_3]^+$  had good redox characteristics and could enable stable electron transfer in catalysis.

The emissions of complex **2-4** in different organic solvents (MeOH, CH<sub>3</sub>COCH<sub>3</sub>, CHCl<sub>3</sub>, CH<sub>3</sub>CN, THF) were examined as well at room temperature (Fig. S2). Like complex **1**, the fluorescence emission intensity of complex **2** in acetone was the largest, while, the intensity in acetonitrile was the lowest. Complex **3** exhibited stable fluorescence characteristics in all five solvents. Complex **4** showed stable fluorescence emissions (350 nm, 540 nm, 625 nm) in five different solvents.

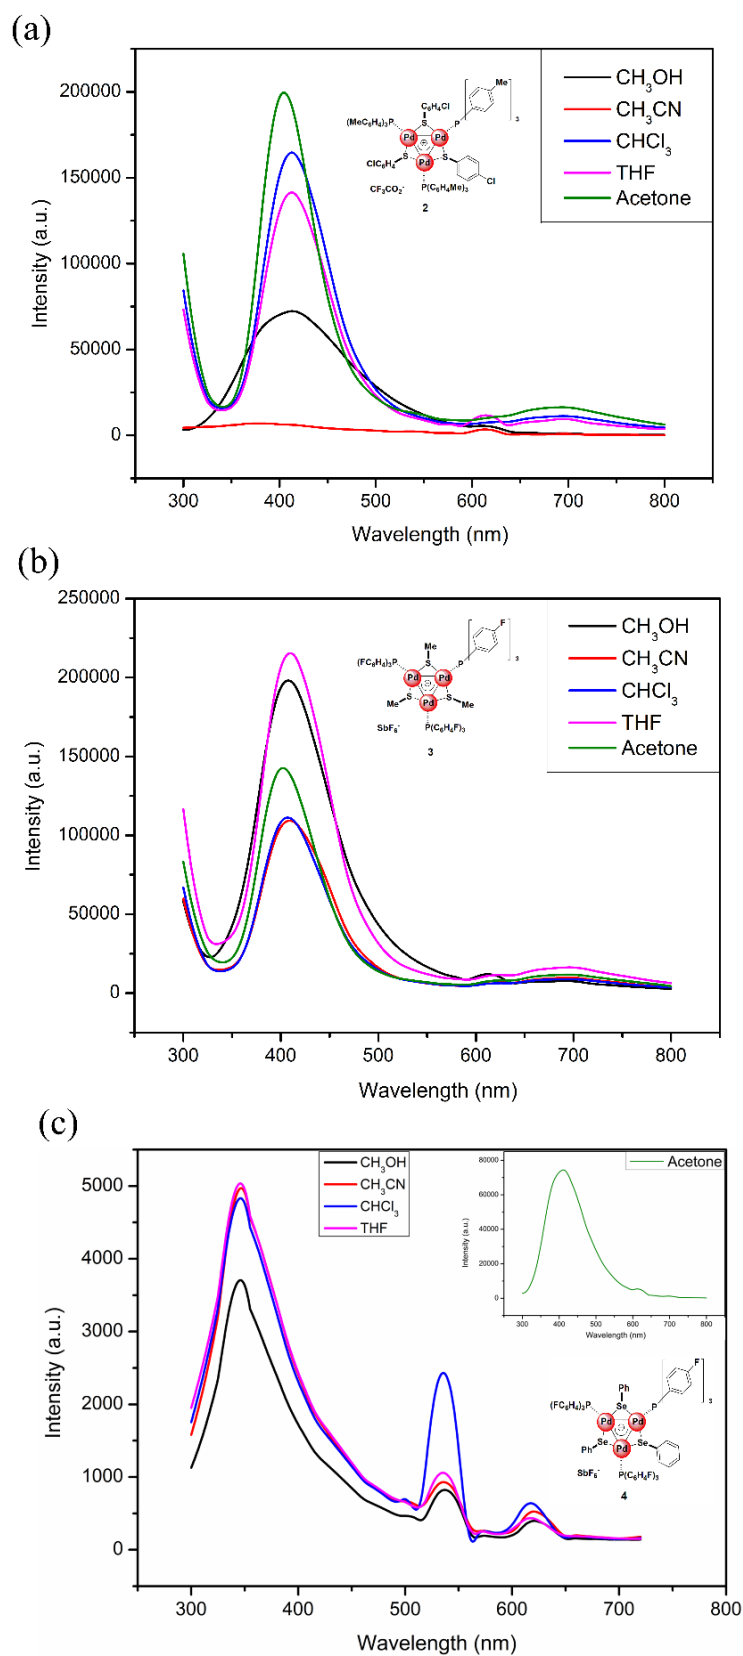

Fig. S2 Fluorescence emission of (a) complex **2** ( $\lambda_{\text{ex}} = 266 \text{ nm}$ ) (b) complex **3** ( $\lambda_{\text{ex}} = 259 \text{ nm}$ ), (c) complex **4** ( $\lambda_{\text{ex}} = 280 \text{ nm}$ ) in different solvents (MeOH,  $\text{CH}_3\text{COCH}_3$ ,  $\text{CHCl}_3$ ,  $\text{CH}_3\text{CN}$ , THF).

## 4. Triangular tri-palladium complexes catalyzed Suzuki reactions

### General synthesis

To a 25 ml round-bottom flask aryl halides (0.5 mmol, 1.0 equiv.), arylboronic acid (1.0 mmol, 2.0 equiv.), the  $[Pd_3]^+$  ( $1.25 \times 10^{-3}$  mmol, 0.0025equiv.) and  $K_2CO_3$  were added. The system underwent three vacuum/nitrogen cycles and then  $CH_3CN/H_2O$  (3ml/1ml) was injected into the round bottom flask. After stirring at  $80^\circ C$ , the reactions were tracked by TLC and GC-MS analysis, the desired products were purified by silica gel column chromatography. Spectroscopic data corresponds to the literatures.

#### (Table 1, entry 7) 4-Acetylbiphenyl<sup>[4]</sup>

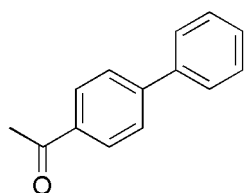

Product was purified on silica gel (petroleum ether/ethyl acetate=10/1). Light yellow powder, 96 mg, 98% yield.  $^1H$  NMR (500 MHz, Chloroform-*d*)  $\delta$  8.06 – 8.00 (m, 2H), 7.71 – 7.65 (m, 2H), 7.65 – 7.60 (m, 2H), 7.50 – 7.37 (m, 3H), 2.63 (s, 3H).  $^{13}C$  NMR (126 MHz, Chloroform-*d*)  $\delta$  197.7, 145.8, 139.9, 135.9, 128.9, 128.9, 128.2, 127.3, 127.2, 26.6.

#### (Table 2, entry 3) 4-Bromobiphenyl<sup>[5]</sup>

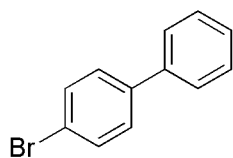

Product was purified on silica gel (petroleum ether). White crystalline powder, 104 mg, 90% yield.  $^1H$  NMR (500 MHz, Chloroform-*d*)  $\delta$  7.61 – 7.50 (m, 4H), 7.46 – 7.39 (m, 4H), 7.38 – 7.32 (m, 1H).  $^{13}C$  NMR (126 MHz, Chloroform-*d*)  $\delta$  140.2, 140.1, 131.9, 128.9, 128.7, 127.6, 126.9, 121.5.

#### (Table 2, entry 3) *p*-Terophenyl<sup>[6]</sup>

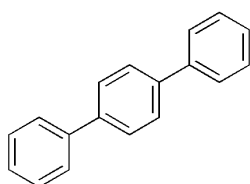

Product was purified on silica gel (petroleum ether). White flake crystal, 12 mg, 10% yield.  $^1H$  NMR (500 MHz, Chloroform-*d*)  $\delta$  7.67 (s, 4H), 7.64 (d,  $J = 8.7$  Hz, 4H), 7.45 (dd,  $J = 8.4, 7.0$  Hz, 4H), 7.38 – 7.33 (m, 2H).  $^{13}C$  NMR (126 MHz, Chloroform-*d*)  $\delta$  140.76, 140.17, 128.85, 127.54, 127.38, 127.09.

#### (Table 2, entry 6) 4-Chlorobiphenyl<sup>[7]</sup>

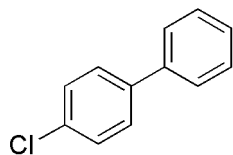

Product was purified on silica gel (petroleum ether). Light yellow crystalline powder, 88 mg, 95% yield.  $^1H$  NMR (500 MHz, Chloroform-*d*)  $\delta$  7.61 – 7.50 (m, 4H), 7.49 – 7.36 (m, 5H).  $^{13}C$  NMR (126 MHz, Chloroform-*d*)  $\delta$  140.1, 139.7, 133.4, 128.9, 128.9, 128.4, 127.6, 127.1.

#### (Table 3, entry 1) Biphenyl<sup>[8]</sup>

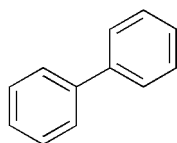

Product was purified on silica gel (petroleum ether). White crystalline powder, 74 mg, 96% yield.  $^1H$  NMR (500 MHz, Chloroform-*d*)  $\delta$  7.61 – 7.56 (m, 4H), 7.43 (dd,  $J = 8.5, 6.9$  Hz, 4H), 7.37 – 7.31 (m, 2H).  $^{13}C$  NMR (126 MHz, Chloroform-*d*)  $\delta$  141.3, 128.8, 127.3, 127.2.

#### (Table 3, entry 2) 4-Methylbiphenyl<sup>[9]</sup>

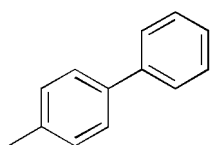

Product was purified on silica gel (petroleum ether). White crystalline powder, 82 mg, 97% yield.  $^1\text{H}$  NMR (500 MHz, Chloroform-*d*)  $\delta$  7.60 – 7.54 (m, 2H), 7.49 (dd,  $J$  = 8.1, 2.3 Hz, 2H), 7.43 – 7.40 (m, 2H), 7.34 – 7.29 (m, 1H), 7.24 (d,  $J$  = 6.0 Hz, 2H), 2.39 (s, 3H).  $^{13}\text{C}$  NMR (126 MHz, Chloroform-*d*)  $\delta$  141.2, 138.4, 137.1, 129.5, 128.7, 127.0, 127.0, 21.1.

**(Table 3, entry 3) 4-Methoxybiphenyl<sup>[10]</sup>**

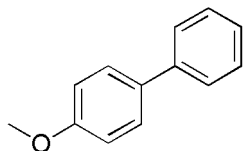

Product was purified on silica gel (petroleum ether). White powder, 87 mg, 95% yield.  $^1\text{H}$  NMR (500 MHz, Chloroform-*d*)  $\delta$  7.55 – 7.51 (m, 4H), 7.40 (t,  $J$  = 7.7 Hz, 2H), 7.32 – 7.25 (m, 1H), 6.96 (d,  $J$  = 8.6 Hz, 2H), 3.82 (s, 3H).  $^{13}\text{C}$  NMR (126 MHz, Chloroform-*d*)  $\delta$  159.2, 140.9, 133.9, 128.8, 128.2, 126.8, 126.7, 114.3, 55.4.

**(Table 3, entry 4) 4-tert-Butylbiphenyl<sup>[11]</sup>**

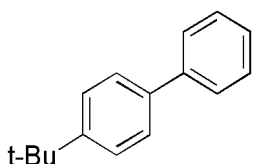

Product was purified on silica gel (petroleum ether). White solid, 96 mg, 93% yield.  $^1\text{H}$  NMR (500 MHz, Chloroform-*d*)  $\delta$  7.58 (d,  $J$  = 7.3 Hz, 2H), 7.53 (d,  $J$  = 8.4 Hz, 2H), 7.46 (d,  $J$  = 8.4 Hz, 2H), 7.41 (t,  $J$  = 7.6 Hz, 2H), 7.31 (t,  $J$  = 7.7 Hz, 1H), 1.36 (s, 9H).  $^{13}\text{C}$  NMR (126 MHz, Chloroform-*d*)  $\delta$  150.3, 141.2, 138.4, 128.8, 127.1, 127.1, 126.9, 125.8, 34.6, 31.4.

**(Table 3, entry 5) 4-Nitrobiphenyl<sup>[12]</sup>**

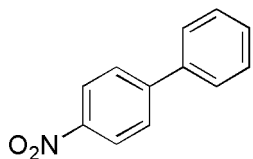

Product was purified on silica gel (petroleum ether/ethyl acetate=10/1). White needle crystal, 97 mg, 97% yield.  $^1\text{H}$  NMR (500 MHz, Chloroform-*d*)  $\delta$  8.29 (d,  $J$  = 8.8 Hz, 2H), 7.75 – 7.70 (m, 2H), 7.65 – 7.60 (m, 2H), 7.53 – 7.42 (m, 3H).  $^{13}\text{C}$  NMR (126 MHz, Chloroform-*d*)  $\delta$  147.6, 147.1, 138.7, 129.2, 128.9, 127.8, 127.4, 124.1.

**(Table 3, entry 6) 4-Cyanobiphenyl<sup>[13]</sup>**

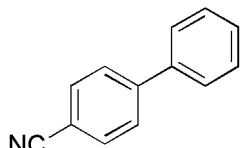

Product was purified on silica gel (petroleum ether). Beige crystalline powder, 85 mg, 95% yield.  $^1\text{H}$  NMR (500 MHz, Chloroform-*d*)  $\delta$  7.65 – 7.58 (m, 4H), 7.52 – 7.47 (m, 2H), 7.42 – 7.37 (m, 2H), 7.36 – 7.32 (m, 1H).  $^{13}\text{C}$  NMR (126 MHz, Chloroform-*d*)  $\delta$  145.7, 139.2, 132.6, 129.1, 128.7, 127.7, 127.2, 118.9, 110.9.

**(Table 3, entry 7) 4-(Trifluoromethyl)biphenyl<sup>[14]</sup>**

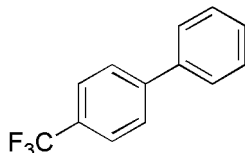

Product was purified on silica gel (petroleum ether/ethyl acetate=10/1). White solid, 100 mg, 94% yield.  $^1\text{H}$  NMR (500 MHz, Chloroform-*d*)  $\delta$  7.68 (s, 4H), 7.60 – 7.57 (m, 2H), 7.48 – 7.44 (m, 2H), 7.42 – 7.37 (m, 1H).  $^{13}\text{C}$  NMR (126 MHz, Chloroform-*d*)  $\delta$  144.7, 139.8, 129.5, 129.1, 128.2, 127.4, 127.3, 125.7 (q,  $J$  = 3.8 Hz), 123.2.

**(Table 3, entry 8) 2-Phenyltoluene<sup>[15]</sup>**

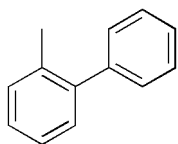

Product was purified on silica gel (petroleum ether). White crystal, 79 mg, 94% yield.  $^1\text{H}$  NMR (500 MHz, Chloroform-*d*)  $\delta$  7.40 (t,  $J$  = 7.4 Hz, 2H), 7.35 – 7.29 (m, 3H), 7.27 – 7.21 (m, 4H), 2.27 (s, 3H).  $^{13}\text{C}$  NMR (126 MHz, Chloroform-*d*)  $\delta$  142.0, 141.9, 135.3, 130.3, 129.8, 129.2, 128.1, 127.2, 126.7, 125.7, 20.4.



**(Table 3, entry 9) 2-Methoxybiphenyl<sup>[16]</sup>**

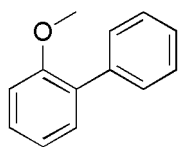

Product was purified on silica gel (petroleum ether/ethyl acetate=10/). White solid, 86 mg, 94% yield. <sup>1</sup>H NMR (500 MHz, Chloroform-*d*) δ 7.60 – 7.55 (m, 2H), 7.45 (t, *J* = 7.7 Hz, 2H), 7.36 (t, *J* = 7.2 Hz, 3H), 7.10 – 7.00 (m, 2H), 3.84 (s, 3H). <sup>13</sup>C NMR (126 MHz, Chloroform-*d*) δ 156.5, 138.6, 130.9, 130.8, 129.6, 128.6, 128.1, 126.9, 120.9, 111.3, 55.6.

**(Table 3, entry 10) 2-Isopropylbiphenyl<sup>[17]</sup>**

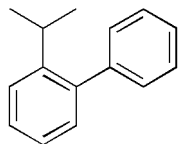

Product was purified on silica gel (petroleum ether). White solid, 94 mg, 96% yield. <sup>1</sup>H NMR (500 MHz, Chloroform-*d*) δ 7.41 – 7.37 (m, 3H), 7.36 – 7.32 (m, 2H), 7.31 – 7.27 (m, 2H), 7.22 – 7.16 (m, 2H), 3.17 – 2.95 (m, 1H), 1.15 (d, *J* = 6.9 Hz, 6H). <sup>13</sup>C NMR (126 MHz, Chloroform-*d*) δ 146.4, 142.1, 141.1, 129.9, 129.3, 128.0, 127.7, 126.7, 125.5, 125.3, 29.3, 24.3.

**(Table 3, entry 11) 2-Nitrodiphenyl<sup>[18]</sup>**

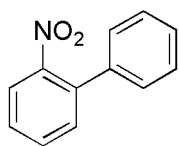

Product was purified on silica gel (petroleum ether/ethyl acetate=10/1). Light yellow powder, 92 mg, 93% yield. <sup>1</sup>H NMR (500 MHz, Chloroform-*d*) δ 7.86 (dd, *J* = 8.0, 1.3 Hz, 1H), 7.64– 7.60 (m, 1H), 7.51 – 7.40 (m, 5H), 7.37 – 7.29 (m, 2H). <sup>13</sup>C NMR (126 MHz, Chloroform-*d*) δ 149.3, 137.3, 136.3, 132.2, 131.9, 128.6, 128.1, 128.1, 127.8, 124.0.

**(Table 3, entry 12) 2-Cyanobiphenyl<sup>[19]</sup>**

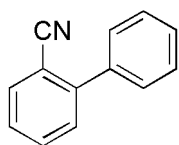

Product was purified on silica gel (petroleum ether). White solid, 85 mg, 95% yield. <sup>1</sup>H NMR (500 MHz, Chloroform-*d*) δ 7.76 (dd, *J* = 7.8, 1.4 Hz, 1H), 7.66 – 7.62 (m, 1H), 7.58 – 7.54 (m, 2H), 7.53 – 7.47 (m, 3H), 7.46 – 7.42 (m, 2H). <sup>13</sup>C NMR (126 MHz, Chloroform-*d*) δ 145.5, 139.6, 138.1, 133.7, 132.8, 130.1, 128.7, 127.5, 118.7, 111.3.

**(Table 3, entry 13) 2-(Trifluoromethyl)biphenyl<sup>[20]</sup>**

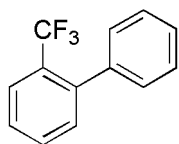

Product was purified on silica gel (petroleum ether/ethyl acetate=10/1). White solid, 99 mg, 93% yield. <sup>1</sup>H NMR (500 MHz, Chloroform-*d*) δ 7.74 (dd, *J* = 7.9, 1.3 Hz, 1H), 7.56 – 7.54 (m, 1H), 7.48 – 7.45 (m, 1H), 7.40 – 7.38 (m, 3H), 7.34 – 7.31 (m, 3H). <sup>13</sup>C NMR (126 MHz, Chloroform-*d*) δ 141.4, 139.8, 132.0, 131.2, 128.9, 128.6, 127.7, 127.6, 127.3, 126.1 (q, *J* = 5.3 Hz), 123.1.

**(Table 3, entry 14) 3,5-dimethyl-1,1'-biphenyl<sup>[21]</sup>**

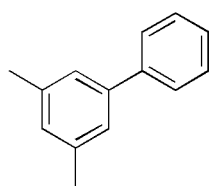

Product was purified on silica gel (petroleum ether). colorless oil, 83 mg, 92% yield. <sup>1</sup>H NMR (500 MHz, Chloroform-*d*) δ 7.59 – 7.53 (m, 2H), 7.40 (t, *J* = 7.6 Hz, 2H), 7.34 – 7.28 (m, 1H), 7.20 (s, 2H), 6.98 (s, 1H), 2.37 (s, 6H). <sup>13</sup>C NMR (126 MHz, Chloroform-*d*) δ 141.6, 141.4, 138.3, 128.9, 128.7, 127.3, 127.1, 125.2, 21.5.

**(Table 3, entry 15) 2,4-Difluorobiphenyl<sup>[22]</sup>**

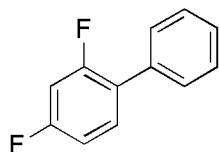

Product was purified on silica gel (petroleum ether/ethyl acetate=10/1). White crystal, 86 mg, 91% yield. <sup>1</sup>H NMR (500 MHz, Chloroform-*d*) δ 7.50–7.48 (m, 2H), 7.46 – 7.34 (m, 4H), 6.98 – 6.86 (m, 2H). <sup>13</sup>C NMR (126 MHz, Chloroform-*d*) δ 162.3 (dd, *J* = 248.9, 11.9 Hz), 159.8 (dd, *J* = 250.2, 11.8 Hz), 135.0, 131.5 (dd, *J* = 9.3, 4.8 Hz), 128.9, 128.6, 127.7, 125.4 (d, *J* = 17.5 Hz), 111.6 (dd, *J* = 21.1, 3.7 Hz), 104.4.

**(Table 3, entry 16) 2,4,6-Trimethyl-1,1'-biphenyl<sup>[23]</sup>**

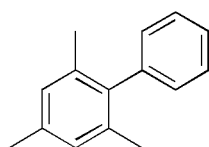

126.5, 21.1, 20.7.

Product was purified on silica gel (petroleum ether). White solid, 88 mg, 90% yield.  $^1\text{H}$  NMR (500 MHz, Chloroform-*d*)  $\delta$  7.43 (d,  $J = 7.6$  Hz, 2H), 7.37 – 7.33 (m, 1H), 7.21 – 7.13 (m, 2H), 6.98 (s, 2H), 2.37 (s, 3H), 2.04 (s, 6H).  $^{13}\text{C}$  NMR (126 MHz, Chloroform-*d*)  $\delta$  141.1, 139.1, 136.5, 136.0, 129.3, 128.3, 128.1,

**(Table 4, entry 1) 3-Phenylpyridine<sup>[24]</sup>**

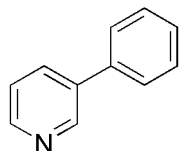

Product was purified on silica gel (petroleum ether/ethyl acetate=10/1). Colorless oily liquid, 73 mg, 95% yield.  $^1\text{H}$  NMR (500 MHz, Chloroform-*d*)  $\delta$  8.85 (d,  $J = 2.3$  Hz, 1H), 8.58 (dd,  $J = 4.8, 1.6$  Hz, 1H), 7.86 – 7.84 (m, 1H), 7.57 (dd,  $J = 7.3, 2.0$  Hz, 2H), 7.46 (dd,  $J = 8.6, 6.8$  Hz, 2H), 7.42 – 7.37 (m, 1H), 7.36 – 7.32 (m, 1H).  $^{13}\text{C}$  NMR (126 MHz, Chloroform-*d*)  $\delta$  148.49, 148.37, 137.87, 136.67, 134.35, 129.10, 128.12, 127.17, 123.55.

**(Table 4, entry 2) 2-Phenylpyrazine<sup>[25]</sup>**

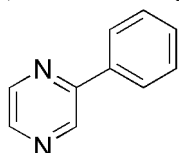

Product was purified on silica gel (petroleum ether/ethyl acetate=10/1). Oily liquid, 70 mg, 90% yield.  $^1\text{H}$  NMR (500 MHz, Chloroform-*d*)  $\delta$  9.04 (d,  $J = 1.6$  Hz, 1H), 8.64 (dd,  $J = 2.5, 1.6$  Hz, 1H), 8.51 (d,  $J = 2.5$  Hz, 1H), 8.07 – 7.99 (m, 2H), 7.54 – 7.48 (m, 3H).  $^{13}\text{C}$  NMR (126 MHz, Chloroform-*d*)  $\delta$  152.9, 144.2, 142.9, 142.2, 136.4, 129.9, 129.1, 126.9.

**(Table 4, entry 3) 3-Phenyl-1H-pyrazole**

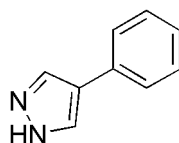

There was the trace amount of desired product.

**(Table 4, entry 4) 3-Phenylthiophene<sup>[26]</sup>**

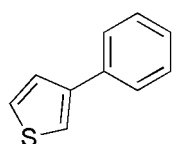

Product was purified on silica gel (petroleum ether). White solid, 76 mg, 95% yield.  $^1\text{H}$  NMR (500 MHz, Chloroform-*d*)  $\delta$  7.57 (d,  $J = 7.4$  Hz, 2H), 7.42 – 7.40 (m, 1H), 7.39 – 7.34 (m, 4H), 7.29 – 7.24 (m, 1H).  $^{13}\text{C}$  NMR (126 MHz, Chloroform-*d*)  $\delta$  142.4, 135.9, 128.8, 127.1, 126.5, 126.4, 126.2, 120.3.

**(Table 4, entry 5) 1-Phenylnaphthalene<sup>[27]</sup>**

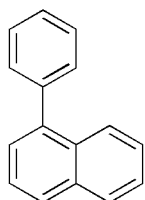

Product was purified on silica gel (petroleum ether). Yellow viscous liquid, 95 mg, 94% yield.  $^1\text{H}$  NMR (500 MHz, Chloroform-*d*)  $\delta$  7.84 – 7.81 (m, 2H), 7.79 – 7.76 (m, 1H), 7.44 – 7.39 (m, 6H), 7.36 – 7.33 (m, 3H).  $^{13}\text{C}$  NMR (126 MHz, Chloroform-*d*)  $\delta$  140.7, 140.2, 133.8, 131.6, 130.1, 128.7, 128.2, 127.6, 127.2, 126.9, 126.0, 126.0, 125.7, 125.3.

**(Table 5, entry 1) 4-Methylbiphenyl**

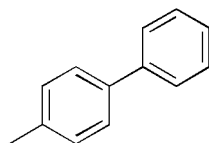

Product was purified on silica gel (petroleum ether). White crystalline powder, 82 mg, 97% yield.  $^1\text{H}$  NMR (500 MHz, Chloroform-*d*)  $\delta$  7.60 – 7.54 (m, 2H), 7.49 (dd,  $J = 8.1, 2.3$  Hz, 2H), 7.43 – 7.40 (m, 2H), 7.34 – 7.29 (m, 1H), 7.24 (d,  $J = 6.0$  Hz, 2H), 2.39 (s, 3H).  $^{13}\text{C}$  NMR (126 MHz, Chloroform-*d*)  $\delta$  141.2, 138.4, 137.1, 129.5, 128.7, 127.0, 127.0, 21.1. Characterization data is consistent with (Table 3, entry 2)

**(Table 5, entry 2) 4-Methoxybiphenyl**

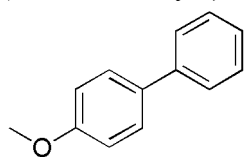

Product was purified on silica gel (petroleum ether). White powder, 87 mg, 95% yield.  $^1\text{H}$  NMR (500 MHz, Chloroform-*d*)  $\delta$  7.55 – 7.51 (m, 4H), 7.40 (t,  $J = 7.7$  Hz, 2H), 7.32 – 7.25 (m, 1H), 6.96 (d,  $J = 8.6$  Hz, 2H), 3.82 (s, 3H).  $^{13}\text{C}$  NMR (126 MHz, Chloroform-*d*)  $\delta$  159.2, 140.9, 133.9, 128.8, 128.2, 126.8, 126.7, 114.3, 55.4. Characterization data is consistent with (Table 3, entry 3)

**(Table 5, entry 3) 4-tert-Butylbiphenyl**

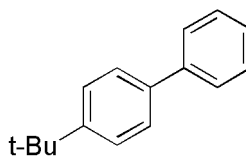

Product was purified on silica gel (petroleum ether). White solid, 96 mg, 93% yield.  $^1\text{H}$  NMR (500 MHz, Chloroform-*d*)  $\delta$  7.58 (d,  $J = 7.3$  Hz, 2H), 7.53 (d,  $J = 8.4$  Hz, 2H), 7.46 (d,  $J = 8.4$  Hz, 2H), 7.41 (t,  $J = 7.6$  Hz, 2H), 7.31 (t,  $J = 7.7$  Hz, 1H), 1.36 (s, 9H).  $^{13}\text{C}$  NMR (126 MHz, Chloroform-*d*)  $\delta$  150.3, 141.2, 138.4, 128.8, 127.1, 127.1, 126.9, 125.8, 34.6, 31.4. Characterization data is consistent with (Table 3, entry 4).

**(Table 5, entry 4) 4-Chlorobiphenyl**

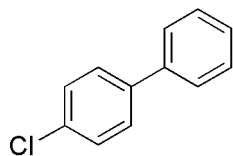

Product was purified on silica gel (petroleum ether). Light yellow crystalline powder, 88 mg, 95% yield, Petroleum ether.  $^1\text{H}$  NMR (500 MHz, Chloroform-*d*)  $\delta$  7.61 – 7.50 (m, 4H), 7.49 – 7.36 (m, 5H).  $^{13}\text{C}$  NMR (126 MHz, Chloroform-*d*)  $\delta$  140.1, 139.7, 133.4, 128.9, 128.9, 128.4, 127.6, 127.1. Characterization data is consistent with (Table 2, entry 6).

**(Table 5, entry 5) 2-Phenyltoluene**

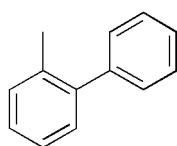

Product was purified on silica gel (petroleum ether). White crystal, 79 mg, 94% yield.  $^1\text{H}$  NMR (500 MHz, Chloroform-*d*)  $\delta$  7.40 (t,  $J = 7.4$  Hz, 2H), 7.35 – 7.29 (m, 3H), 7.27 – 7.21 (m, 4H), 2.27 (s, 3H).  $^{13}\text{C}$  NMR (126 MHz, Chloroform-*d*)  $\delta$  142.0, 141.9, 135.3, 130.3, 129.8, 129.2, 128.1, 127.2, 126.7, 125.7, 20.4. Characterization data is consistent with (Table 3, entry 8)

**(Table 5, entry 6) 2-Chlorobiphenyl<sup>[28]</sup>**

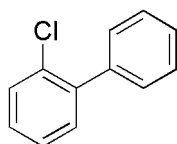

Product was purified on silica gel (petroleum ether). Light yellow powder, 91 mg, 97% yield.  $^1\text{H}$  NMR (500 MHz, Chloroform-*d*)  $\delta$  7.48 – 7.40 (m, 5H), 7.40 – 7.36 (m, 1H), 7.35 – 7.25 (m, 3H).  $^{13}\text{C}$  NMR (126 MHz, Chloroform-*d*)  $\delta$  140.5, 139.4, 132.5, 131.4, 129.9, 129.4, 128.5, 128.1, 127.6, 126.8.

**(Table 5, entry 7) 2-(Trifluoromethyl)biphenyl**

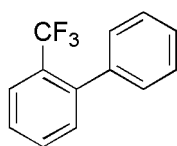

Product was purified on silica gel (petroleum ether/ethyl acetate=10/1). White solid, 100 mg, 94% yield.  $^1\text{H}$  NMR (500 MHz, Chloroform-*d*)  $\delta$  7.74 (dd,  $J = 7.9, 1.3$  Hz, 1H), 7.56 – 7.54 (m, 1H), 7.48 – 7.45 (m, 1H), 7.40 – 7.38 (m, 3H), 7.34 – 7.31 (m, 3H).  $^{13}\text{C}$  NMR (126 MHz, Chloroform-*d*)  $\delta$  141.4, 139.8, 132.0, 131.2, 128.9, 128.6, 127.7, 127.6, 127.3, 126.1 (q,  $J = 5.3$  Hz), 123.1. Characterization data is consistent with (Table 3, entry 13)

**(Table 5, entry 8) 3-Phenylthiophene**

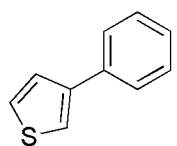

Product was purified on silica gel (petroleum ether). White solid, 77 mg, 96% yield.  $^1\text{H}$  NMR (500 MHz, Chloroform-*d*)  $\delta$  7.57 (d,  $J = 7.4$  Hz, 2H), 7.42 – 7.40 (m, 1H), 7.39 – 7.34 (m, 4H), 7.29 – 7.24 (m, 1H).  $^{13}\text{C}$  NMR (126 MHz, Chloroform-*d*)  $\delta$  142.4, 135.9, 128.8, 127.1, 126.5, 126.4, 126.2, 120.3. Characterization data is consistent with (Table 4, entry 4)

**(Table 5, entry 9) 5-phenyl-1,3-benzodioxole<sup>[29]</sup>**

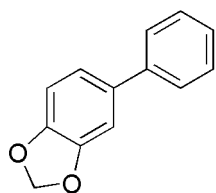

Product was purified on silica gel (petroleum ether). White solid, 93 mg, 94% yield. <sup>1</sup>H NMR (500 MHz, Chloroform-*d*) δ 7.57 – 7.54 (m, 2H), 7.48 – 7.41 (m, 2H), 7.35 (s, 1H), 7.16 – 7.07 (m, 2H), 6.93 – 6.90 (m, 1H), 6.01 (s, 2H). <sup>13</sup>C NMR (126 MHz, Chloroform-*d*) δ 148.2, 147.1, 141.0, 135.6, 128.8, 126.9, 126.9, 120.6, 108.6, 107.7, 101.1.

**(Table 5, entry 10) 3-(3-thienyl)-1H-pyrazole**

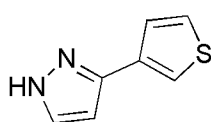

There was the trace amount of desired product.

**(Table 5, entry 11) 3-(thiophen-3-yl)pyridine<sup>[30]</sup>**

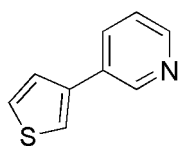

Product was purified on silica gel (petroleum ether/ethyl acetate=10/1). Yellow viscous liquid, 77 mg, 96% yield. <sup>1</sup>H NMR (500 MHz, Chloroform-*d*) δ 8.88 (d, *J* = 2.4 Hz, 1H), 8.56 – 8.51 (m, 1H), 7.88 – 7.86 (m, 1H), 7.52 (dd, *J* = 3.0, 1.4 Hz, 1H), 7.45 (dd, *J* = 5.0, 3.0 Hz, 1H), 7.39 (dd, *J* = 5.0, 1.4 Hz, 1H), 7.33 (dd, *J* = 7.9, 4.8 Hz, 1H). <sup>13</sup>C NMR (126 MHz, Chloroform-*d*) δ 148.1, 147.6, 138.8, 133.6, 131.6, 127.0, 125.9, 123.6, 121.5.

**(Table 5, entry 12) 3,3'-Bithiophene<sup>[31]</sup>**

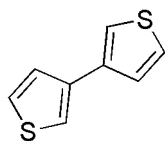

Product was purified on silica gel (petroleum ether). White solid, 79 mg, 96% yield. <sup>1</sup>H NMR (500 MHz, Chloroform-*d*) δ 7.39 (dd, *J* = 2.8, 1.4 Hz, 2H), 7.37 – 7.33 (m, 4H). <sup>13</sup>C NMR (126 MHz, Chloroform-*d*) δ 137.3, 126.4, 126.1, 119.8.

**(Table 5, entry 13) 3-(3,4-methylenedioxyphenyl)pyridine<sup>[32]</sup>**

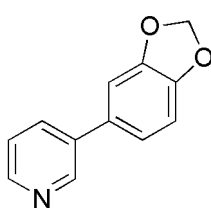

Product was purified on silica gel (petroleum ether/ethyl acetate=10/1). White solid, 93 mg, 93% yield. <sup>1</sup>H NMR (500 MHz, Chloroform-*d*) δ 8.78 (s, 1H), 8.55 (d, *J* = 3.8 Hz, 1H), 7.79 (d, *J* = 7.8 Hz, 1H), 7.32 (dd, *J* = 7.5, 4.7 Hz, 1H), 7.04 (s, 2H), 6.91 (d, *J* = 8.4 Hz, 1H), 6.01 (s, 2H). <sup>13</sup>C NMR (126 MHz, Chloroform-*d*) δ 148.4, 148.1, 147.8, 136.4, 134.1, 131.9, 123.5, 120.8, 108.9, 107.5, 101.3, 29.7.

**(Table 5, entry 14) 5-(thiophen-3-yl)benzo[d][1,3]dioxole<sup>[33]</sup>**

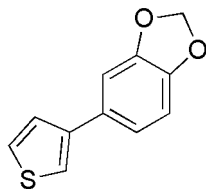

Product was purified on silica gel (petroleum ether). White solid, 97 mg, 95% yield. <sup>1</sup>H NMR (500 MHz, Chloroform-*d*) δ 7.36 – 7.28 (m, 3H), 7.09 – 7.05 (m, 2H), 6.83 (d, *J* = 8.5 Hz, 1H), 5.98 (s, 2H). <sup>13</sup>C NMR (126 MHz, Chloroform-*d*) δ 148.1, 146.8, 142.1, 130.3, 126.3, 126.1, 119.9, 119.3, 108.5, 107.1, 101.1, 29.7.

### Examination of stabilities of [Pd<sub>3</sub>]<sup>+</sup> species during catalytic Suzuki reaction

The HRMS tracking study had been realized to investigate whether [Pd<sub>3</sub>]<sup>+</sup> were present in the reaction process throughout these catalytic Suzuki reaction. Model reaction between 4'-iodoacetophenone and phenylboronic acid catalyzed by **1** was

detected by HRMS from 0 to 6 hours and reaction samples were collected each hour. Experimental results showed that the catalyst (centered at  $m/z = 1698$ ) remained until complete conversion of the substrate was found.

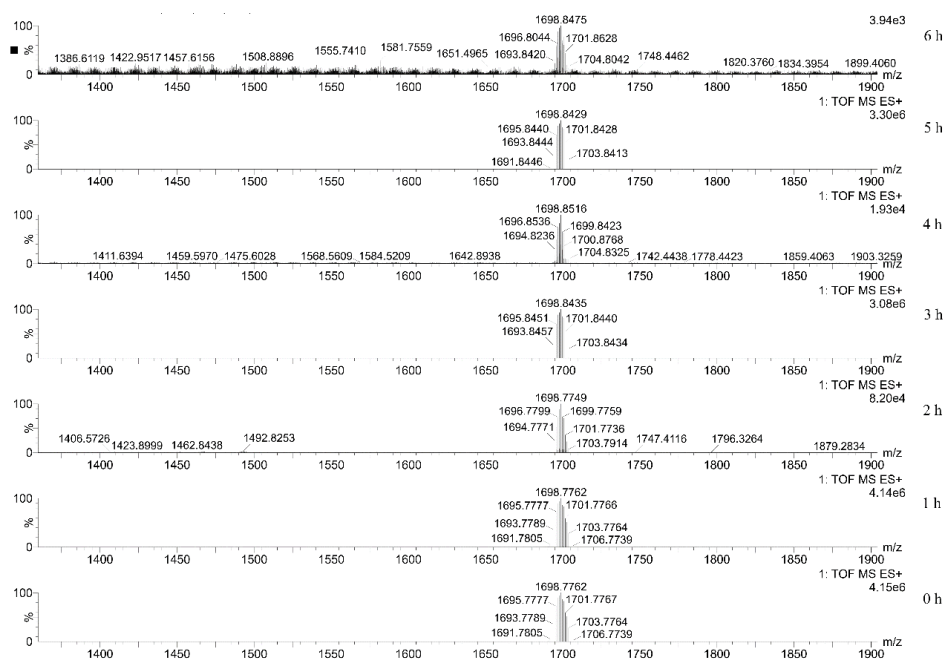

Fig. S3 HRMS tracking of  $[\text{Pd}_3]^+$  in the Suzuki reaction.

The UV-vis spectrum of the solution showed that the absorption spectrum of  $[\text{Pd}_3]^+$  remained almost unchanged during the reaction and indicated that there was no obvious cluster size change or decomposition.

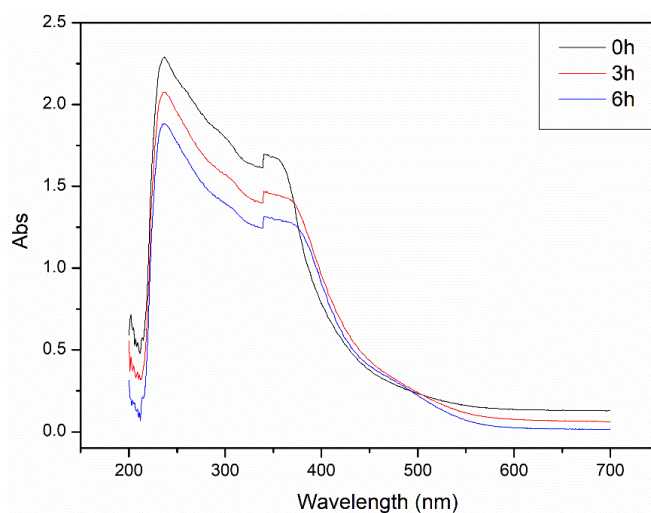

Fig. S4 UV-vis spectrum tracking of  $[\text{Pd}_3]^+$  in the Suzuki reaction.

## 5. Reaction condition screening of **1**-catalyzed coupling reaction of 4-methoxy-1-bromobenzene

**Table S1.** Suzuki reaction of 4-methoxy-1-bromobenzene and phenylboronic acid<sup>a</sup>

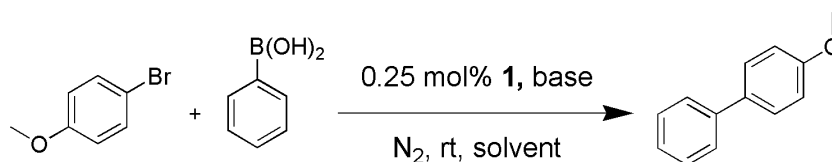

| Entry | Solvent                            | Base                                           | T[h] | Yield (%) <sup>b</sup> |
|-------|------------------------------------|------------------------------------------------|------|------------------------|
| 1     | DMF/H <sub>2</sub> O=1/1           | K <sub>2</sub> CO <sub>3</sub>                 | 0.5  | trace                  |
| 2     | DMF/H <sub>2</sub> O=2/1           | K <sub>2</sub> CO <sub>3</sub>                 | 6    | trace                  |
| 3     | DMF/H <sub>2</sub> O=1/4           | K <sub>2</sub> CO <sub>3</sub>                 | 6    | trace                  |
| 4     | CH <sub>2</sub> Cl <sub>2</sub>    | K <sub>2</sub> CO <sub>3</sub>                 | 5    | trace                  |
| 5     | THF                                | K <sub>2</sub> CO <sub>3</sub>                 | 5    | trace                  |
| 6     | Dioxane                            | K <sub>2</sub> CO <sub>3</sub>                 | 5    | trace                  |
| 7     | CH <sub>3</sub> CN                 | K <sub>2</sub> CO <sub>3</sub>                 | 5    | trace                  |
| 8     | CH <sub>3</sub> OH                 | K <sub>2</sub> CO <sub>3</sub>                 | 5    | trace                  |
| 9     | CH <sub>3</sub> CH <sub>2</sub> OH | K <sub>2</sub> CO <sub>3</sub>                 | 5    | trace                  |
| 10    | Dioxane                            | N(C <sub>2</sub> H <sub>5</sub> ) <sub>3</sub> | 6    | trace                  |
| 11    | Dioxane                            | Na <sub>3</sub> PO <sub>4</sub>                | 6    | trace                  |
| 12    | CH <sub>3</sub> OH                 | N(C <sub>2</sub> H <sub>5</sub> ) <sub>3</sub> | 6    | trace                  |

<sup>a</sup>Reaction conditions: 4-methoxy-1-bromobenzene (0.5 mmol, 1.0 equiv.), phenylboronic acid (0.75 mmol, 1.5 equiv.), catalyst **1** (0.00125 mmol, 0.24 g, 0.0025 equiv.), base (1 mmol, 2 equiv.), room temperature, in  $\text{N}_2$ , the reaction was monitored by TLC and GC. <sup>b</sup>GC yields.

The conditions for the  $[\text{Pd}_3]^+$  catalyzed reaction between 4-methoxy-1-bromobenzene and phenylboronic acid had been examined (Table S1). However, under general conditions, <sup>[34]</sup> **1** did not show any catalytic activity for the coupling reaction (Table S1, Entry 1). Therefore, the reaction conditions were adjusted. We first changed the ratio of DMF to H<sub>2</sub>O in the original reaction. Two

solvents ratios (DMF/H<sub>2</sub>O=2/1, 1/4) were tried, and the reaction time was extended to 6 h, but still only trace products were obtained (Table S1, Entries 2,3). Next, several solvents were examined, including dichloromethane, tetrahydrofuran, dioxane, acetonitrile (Table S1, Entries 4-7) and alcohol (methanol and ethanol) (Table S1, Entries 8, 9). The reaction did not achieve any reactivity in these solvents. Finally, the base was also screened. Regardless of changing from K<sub>2</sub>CO<sub>3</sub> to Na<sub>3</sub>PO<sub>4</sub> or organic base N(C<sub>2</sub>H<sub>5</sub>)<sub>3</sub>, no catalytic reactivity was obtained (Table S1, Entries 10-12).

## 6. Synthesis of 2-[1,1'-Biphenyl]-2-ylbenzothiazole

### Synthesis of precursor 2-(2-Iodophenyl)benzo[*d*]thiazole

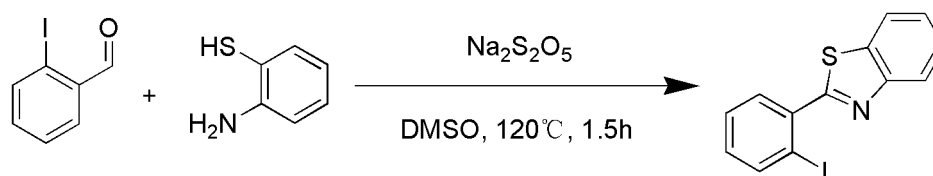

Scheme S1. Synthesis of precursor

Following a slightly modified procedure from literature, 2-iodobenzaldehyde (0.7 g, 3.0 mmol, 1 equiv.) and sodium disulfite (0.4 g, 3 mmol, 1 equiv.) were added to a 25 ml round bottom flask and then DMSO (4 ml) was added. Then 2-aminothiophenol (0.8 g, 3 mmol, 1 equiv.) was added to the system. The reaction mixture was stirred at 120° C for 1.5 h. After the reaction system was cooled to room temperature, 100 ml of H<sub>2</sub>O was added. The mixture was extracted with dichloromethane (3×150 ml) and the combined organic layer was dried over anhydrous Na<sub>2</sub>SO<sub>4</sub>, filtered and concentrated in vacuo. The solid obtained under vacuum was purified by column chromatography on silica gel (cyclohexane/EtOAc 30:1) to give 2-(2-iodophenyl)benzo[*d*]thiazole (1.5 g, 4.5 mmol, 75%) as a yellow solid.

### Synthesis of an analogue of COX-2-selective inhibitor 2-[1,1'-Biphenyl]-2-ylbenzothiazole

To a 25 ml round-bottom flask, phenylboronic acid (0.18 mmol, 3 equiv.), 2-(2-iodophenyl)benzo[*d*]thiazole (0.06 mmol, 1 equiv.), **1** (0.00125 mmol, 0.0025 equiv), K<sub>2</sub>CO<sub>3</sub> (0.18 mmol, 3 equiv.) and CH<sub>3</sub>CN/H<sub>2</sub>O (3/1) were added successively. After stirring at 80°C for 12h, the reaction was tracked by TLC and GC-MS analysis. The solution was filtered and dried under vacuum and then the solid was separated by

silica gel column (cyclohexane/EtOAc 30:1) to obtain the 2-[1,1'-Biphenyl]-2-ylbenzothiazole (isolated yield = 94%).

### 2-(2-Iodophenyl)benzo[d]thiazole (Scheme S1)<sup>[35]</sup>

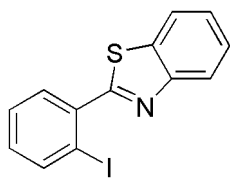

(Light yellow solid, 1.5 g, 75% yield) <sup>1</sup>H NMR (500 MHz, Chloroform-d) δppm 8.17 – 8.15 (m, 1H), 8.04 (dd, J = 8.0, 1.2 Hz, 1H), 7.96 – 7.94 (m, 1H), 7.72 (dd, J = 7.7, 1.7 Hz, 1H), 7.56 – 7.53 (m, 1H), 7.51 – 7.42 (m, 2H), 7.19 – 7.15 (m, 1H). <sup>13</sup>C NMR (126 MHz, Chloroform-d) δ 167.9, 153.1, 140.7, 138.5, 136.2, 131.5, 131.3, 128.2, 126.4, 125.6, 123.8, 121.6, 96.4.

### 2-[1,1'-Biphenyl]-2-ylbenzothiazole (Scheme 2)<sup>[36]</sup>

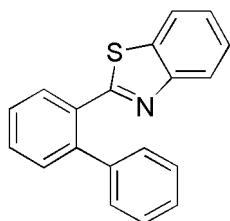

(White solid, 48 mg, 94% yield) <sup>1</sup>H NMR (500 MHz, Chloroform-d) δppm 8.09 – 8.06 (m, 1H), 8.05 – 8.03 (m, 1H), 7.72 – 7.70 (m, 1H), 7.54 – 7.50 (m, 2H), 7.47 – 7.41 (m, 2H), 7.38 – 7.29 (m, 6H). <sup>13</sup>C NMR (126 MHz, Chloroform-d) δ 167.9, 152.8, 141.8, 140.3, 136.7, 132.7, 130.9, 130.5, 130.1, 130.0, 128.4, 127.8, 125.9, 124.9, 123.3, 121.4.

## 7. GC/GC-MS data of reaction GC data of Suzuki-Miyaura coupling reactions

*Suzuki reactions of phenyl/ para-substituted phenyl iodides with phenylboronic acid*

(Table 3, entry 1)

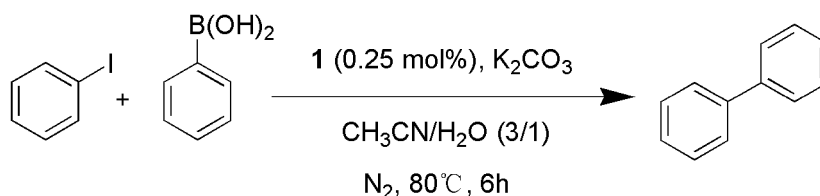

**Scheme S2** **1**-catalyzed the reaction of iodobenzene and phenylboronic acid.

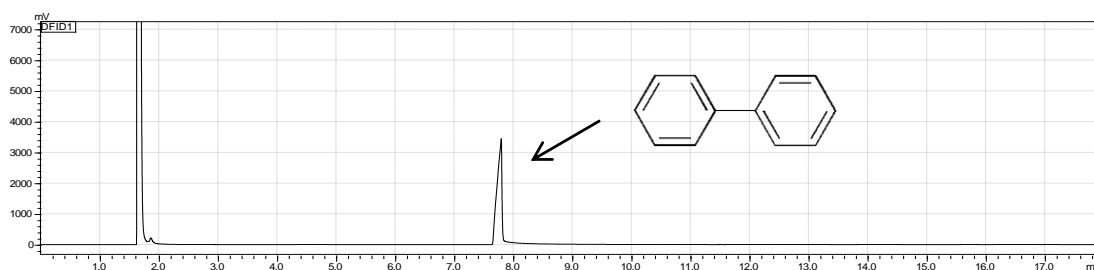

**Fig. S5** GC of the reaction of iodobenzene and phenylboronic acid.



(Table 3, entry 2)

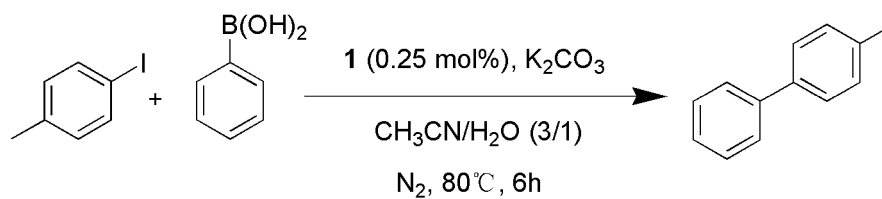

Scheme S3 1-catalyzed reaction of 4-iodotoluene and phenylboronic acid.

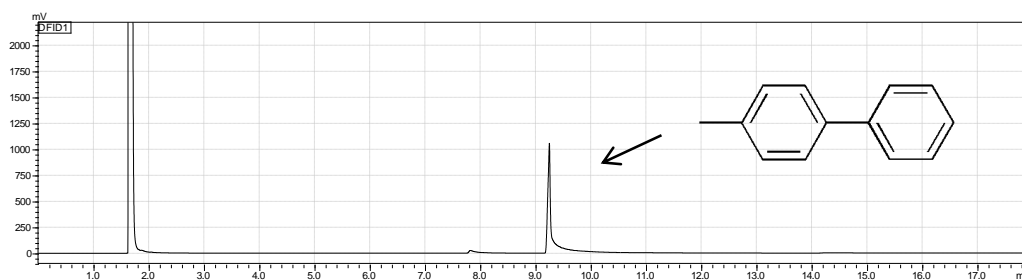

Fig. S6 GC of reaction of 4-iodotoluene and phenylboronic acid.

(Table 3, entry 3)

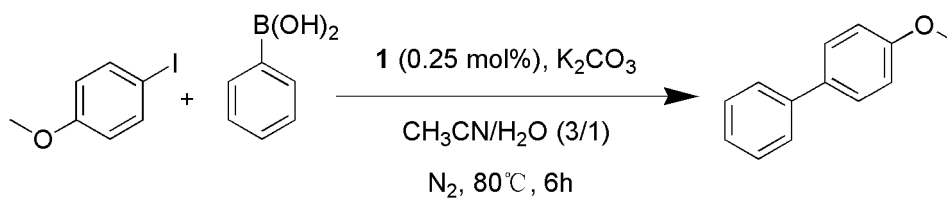

Scheme S4 1-catalyzed reaction of 4-iodoanisole and phenylboronic acid.

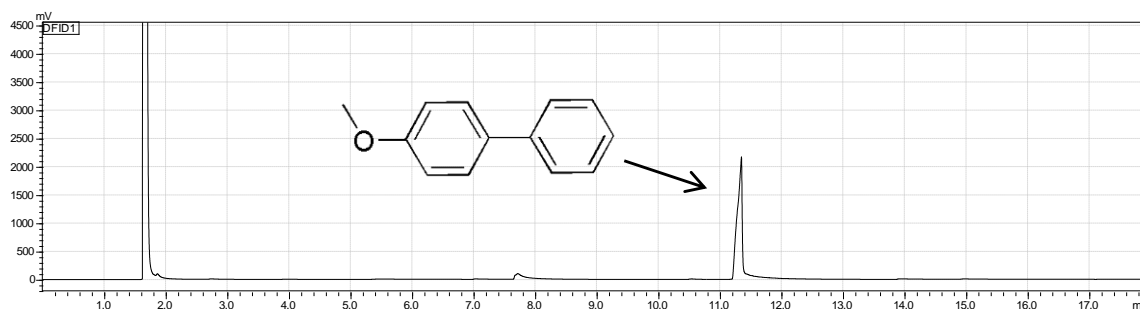

Fig. S7 GC of the reaction of 4-iodoanisole and phenylboronic acid.

(Table 3, entry 4)

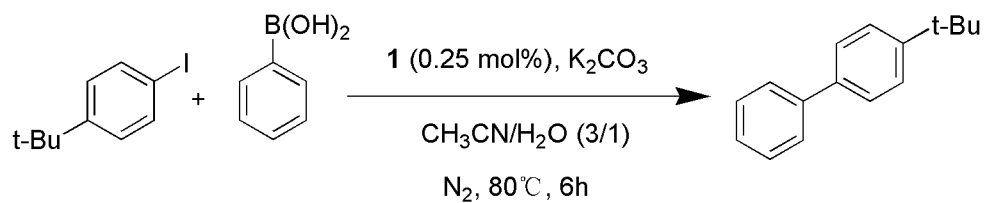

Scheme S5 1-catalyzed reaction of 1-tert-butyl-4-iodobenzene and phenylboronic acid.

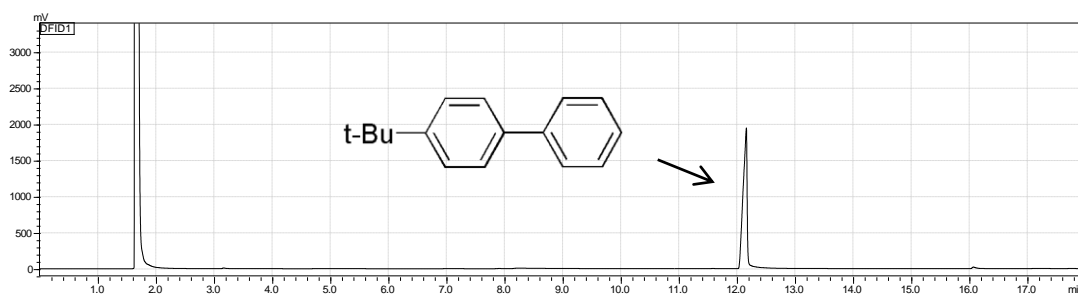

Fig. S8 GC of the reaction of 1-tert-butyl-4-iodobenzene and phenylboronic acid.

(Table 3, entry 5)

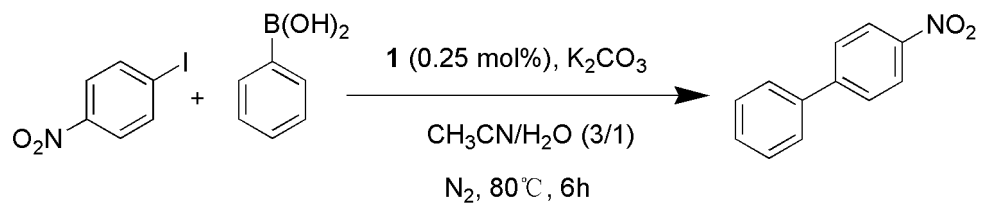

Scheme S6 1-catalyzed reaction of 1-iodo-4-nitrobenzene and phenylboronic acid.

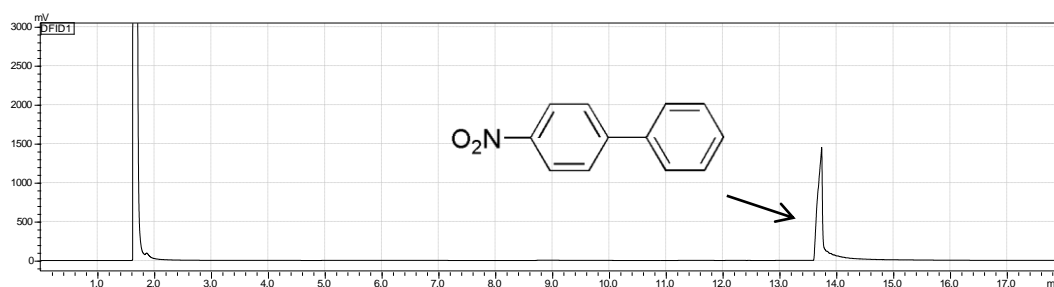

Fig. S9 GC of the reaction of 1-iodo-4-nitrobenzene and phenylboronic acid.

(Table 3, entry 6)

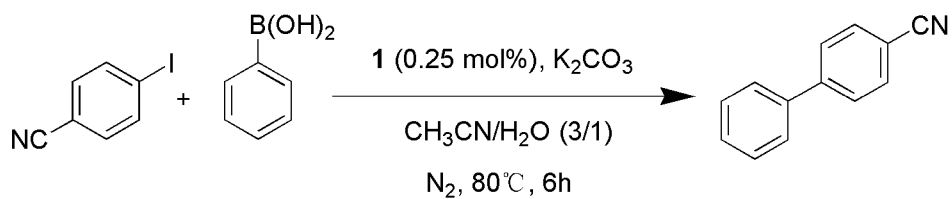

Scheme S7 1-catalyzed reaction of 4-iodobenzonitrile and phenylboronic acid.

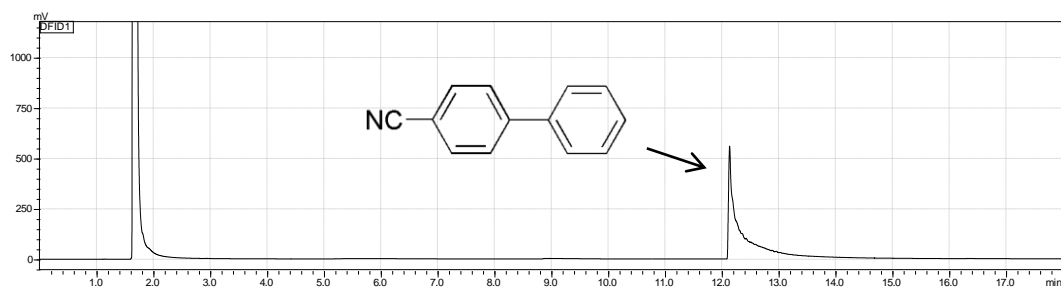

Fig. S10 GC of the reaction of 4-iodobenzonitrile and phenylboronic acid.

(Table 3, entry 7)

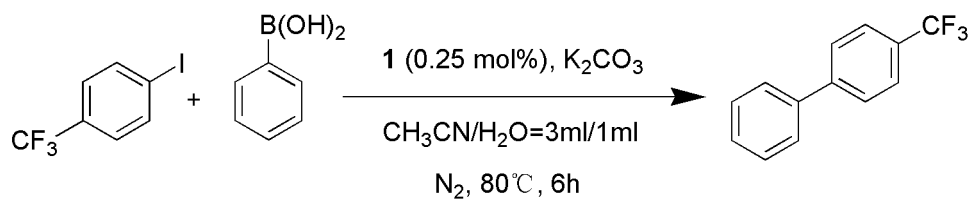

Scheme S8 1-catalyzed reaction of 4-iodobenzotrifluoride and phenylboronic acid.

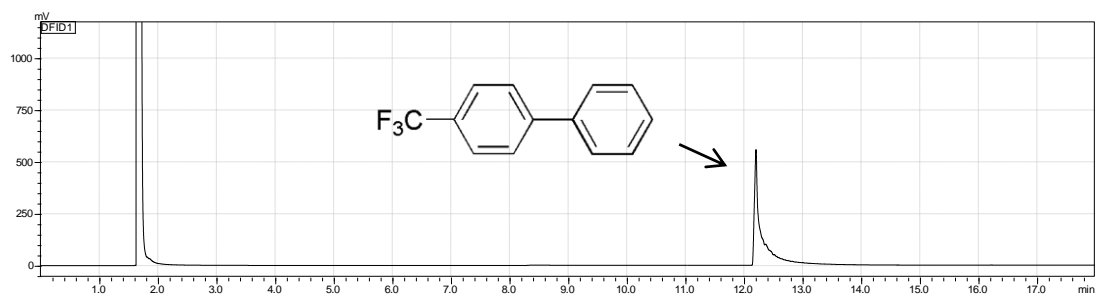

Fig. S11 GC of the reaction of 4-iodobenzotrifluoride and phenylboronic acid.

Suzuki reactions of *ortho*-substituted and polysubstituted aryl iodides with phenylboronic acid

(Table 3, entry 8)

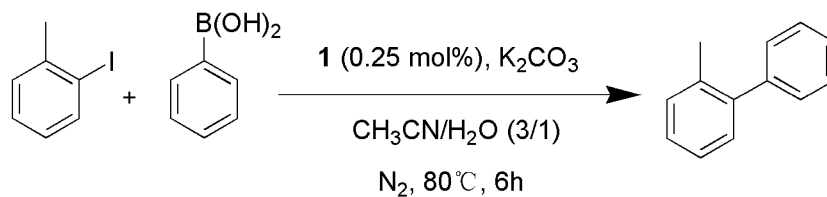

Scheme S9 **1**-catalyzed reaction of 2-iodotoluene and phenylboronic acid.

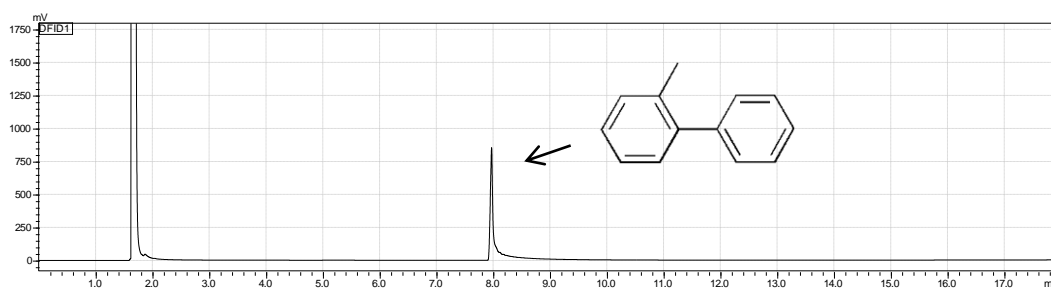

Fig. S12 GC of the reaction of 2-iodotoluene and phenylboronic acid.

(Table 3, entry 9)

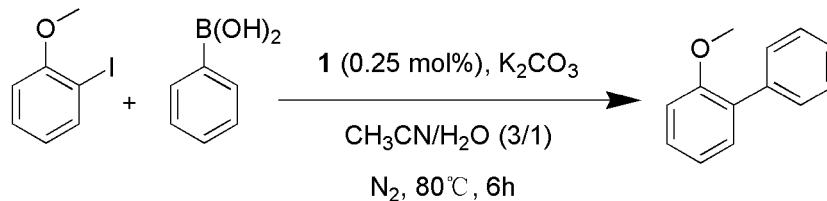

Scheme S10 **1**-catalyzed reaction of 2-iodoanisole and phenylboronic acid.

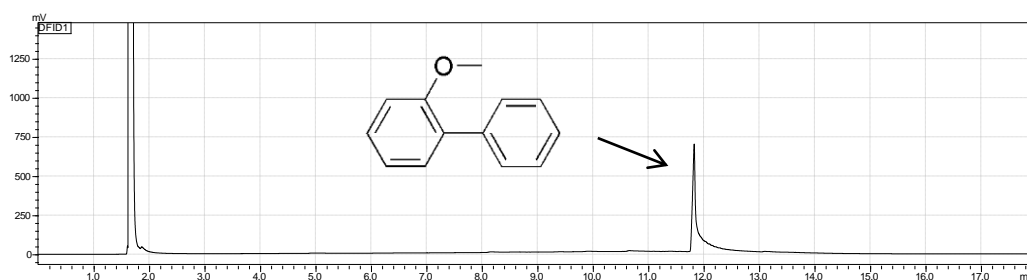

Fig. S13 GC of the reaction of 2-iodoanisole and phenylboronic acid.

(Table 3, entry 10)

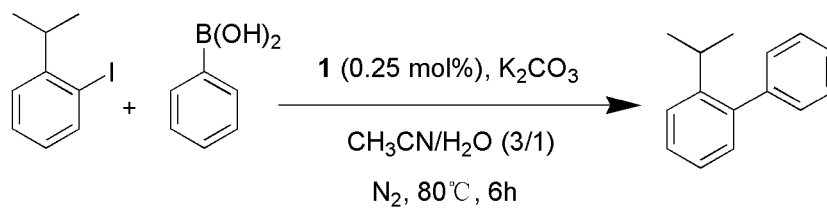

Scheme S11 1-catalyzed reaction of 1-iodo-2-isopropylbenzene and phenylboronic acid.

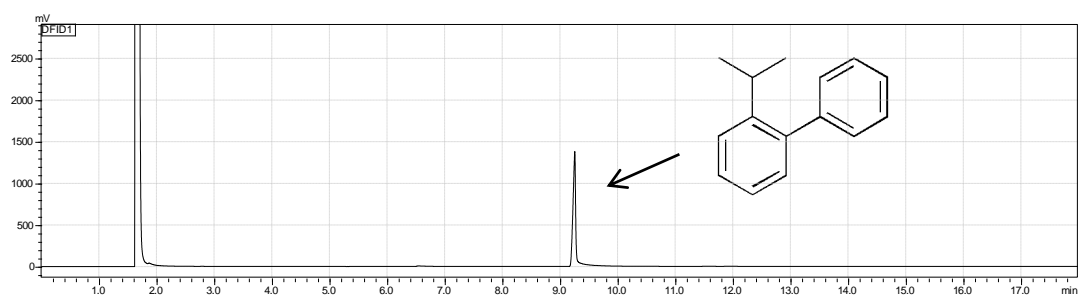

Fig. S14 GC of the reaction of 1-iodo-2-isopropylbenzene and phenylboronic acid.

(Table 3, entry 11)

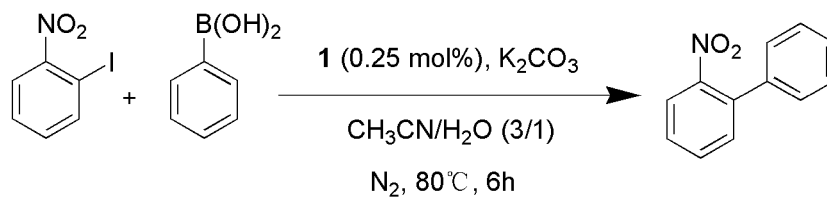

Scheme S12 1-catalyzed reaction of 2-nitroiodobenzene and phenylboronic acid.

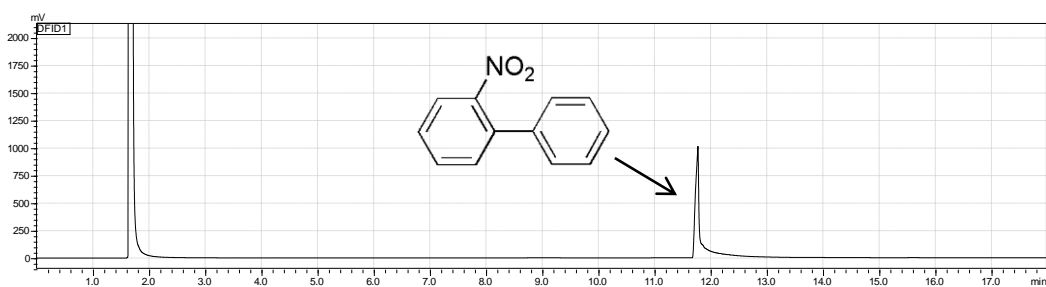

Fig. S15 GC of the reaction of 2-nitroiodobenzene and phenylboronic acid.

(Table 3, entry 12)

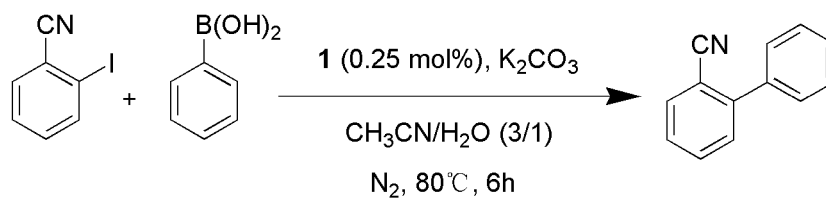

Scheme S13 1-catalyzed reaction of 2-iodobenzonitrile and phenylboronic acid.

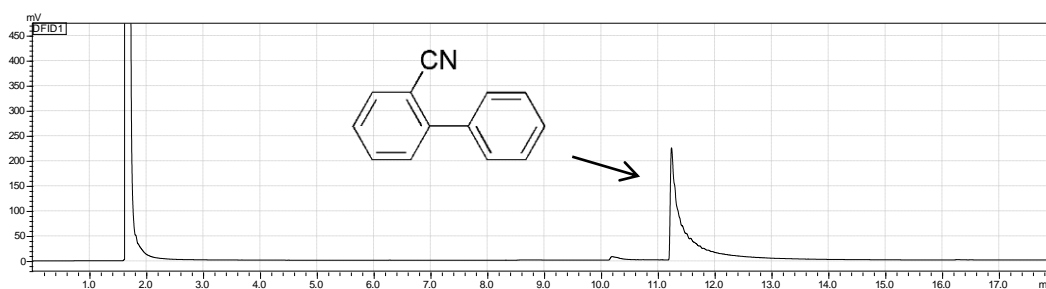

Fig. S16 GC of the reaction of 2-iodobenzonitrile and phenylboronic acid.

(Table 3, entry 13)

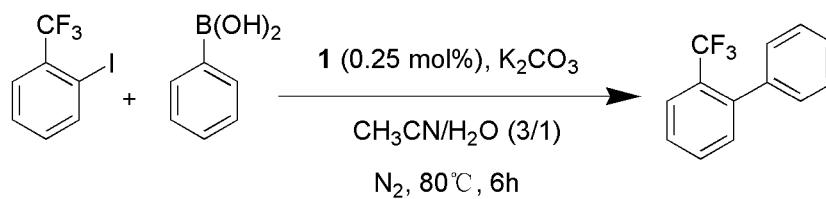

Scheme S14 1-catalyzed reaction of 2-iodobenzotrifluoride and phenylboronic acid.

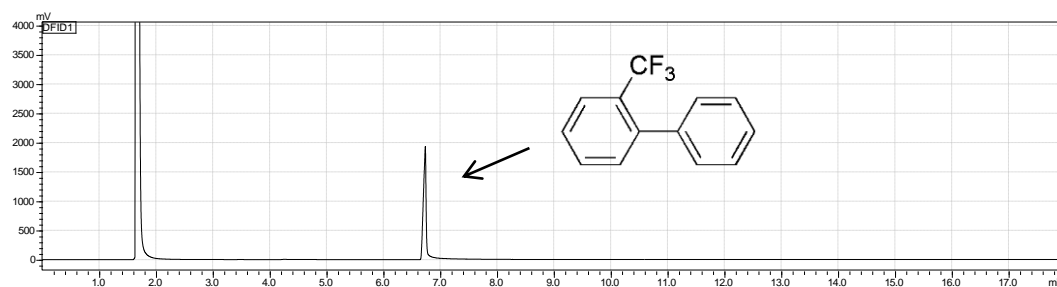

Fig. S17 GC of the reaction of 2-iodobenzotrifluoride and phenylboronic acid.

(Table 3, entry 14)

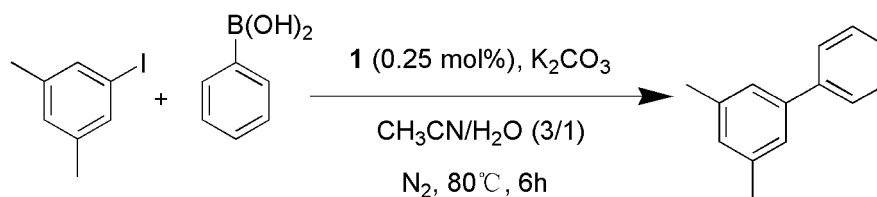

Scheme S15 1-catalyzed reaction of 1-iodo-3,5-dimethylbenzene and phenylboronic acid.

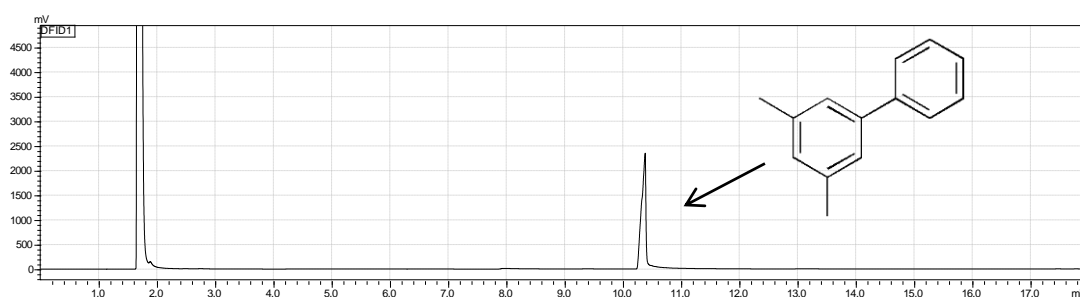

Fig. S18 GC of the reaction of 1-iodo-3,5-dimethylbenzene and phenylboronic acid.

(Table 3, entry 15)

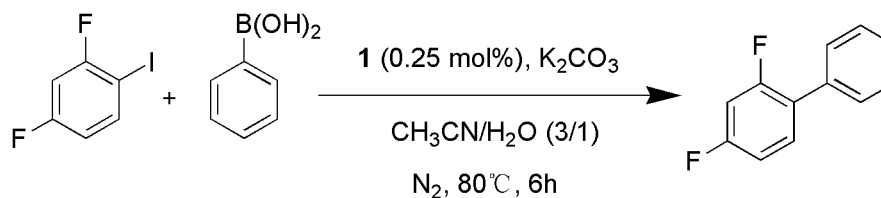

Scheme S16 1-catalyzed reaction of 2,4-difluoroiodobenzene and phenylboronic acid.

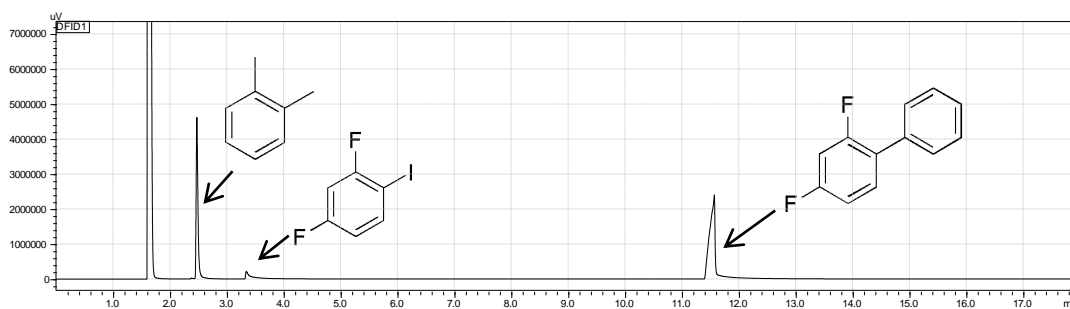

Fig. S19 GC of the reaction of 2,4-difluoroiodobenzene and phenylboronic acid.

The substrate without quantitative conversions was calibrated by internal standard method. The specific operation steps: 100% (0.5mmol), 80%, 60%, 40%, 20% aryl iodide-acetonitrile (1.5ml) solution was prepared. Then 0.3 mmol 1,2-dimethylbenzene was added to each of the five

solutions. According to the GC, the ratio of the peak area of the aryl iodide to the 1,2-dimethylbenzene was calculated as the ordinate and the percentage of the added raw material was used as the abscissa. Through automatic linear fitting, the equation was:  $y=0.112x+0.032$

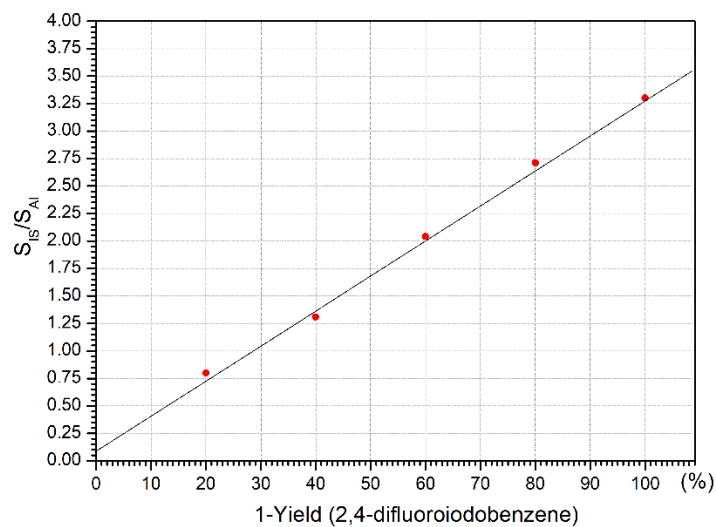

**Fig. S20** Calibration chart of the yield of the reaction of 2,4-difluoriodobenzene and phenylboronic acid.

(Table 3, entry 16)

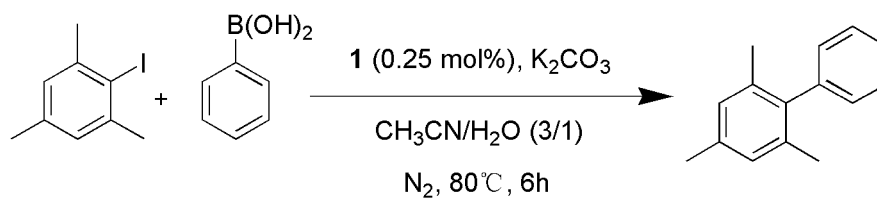

**Scheme S17** 1-catalyzed reaction of 2,4,6-trimethyliodobenzene and phenylboronic acid.

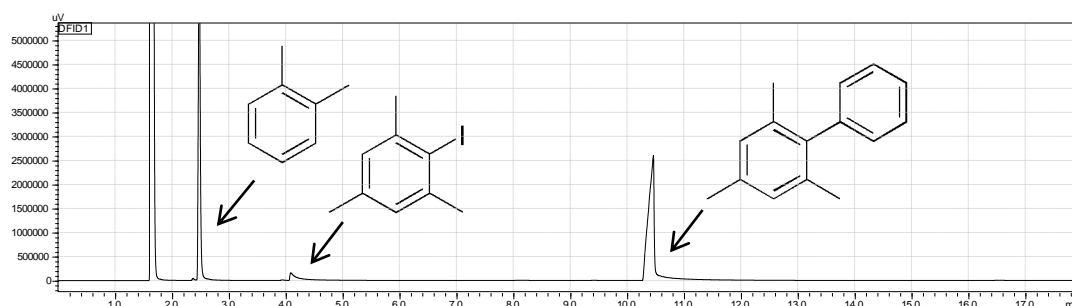

**Fig. S21** GC of the reaction of 2,4,6-trimethyliodobenzene and phenylboronic acid.



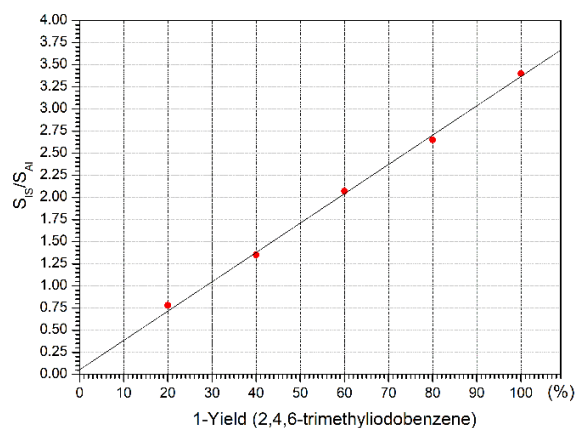

the equation was:  $y=0.088x+0.033$

**Fig. S22** Calibration chart of the yield of the reaction of 2,4,6-trimethyliodobenzene and phenylboronic acid.

*Suzuki reaction of heterocyclic/polycyclic aryl iodides with phenylboronic acid*  
**(Table 4, entry 1)**

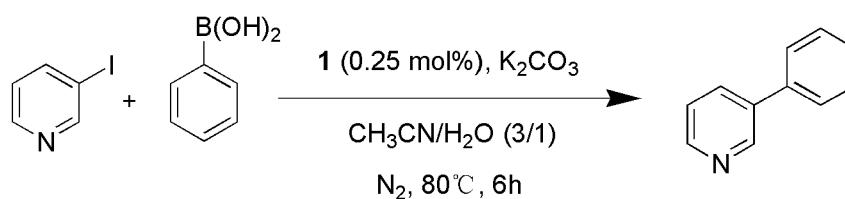

**Scheme S18** 1-catalyzed reaction of 3-iodopyridine and phenylboronic acid.

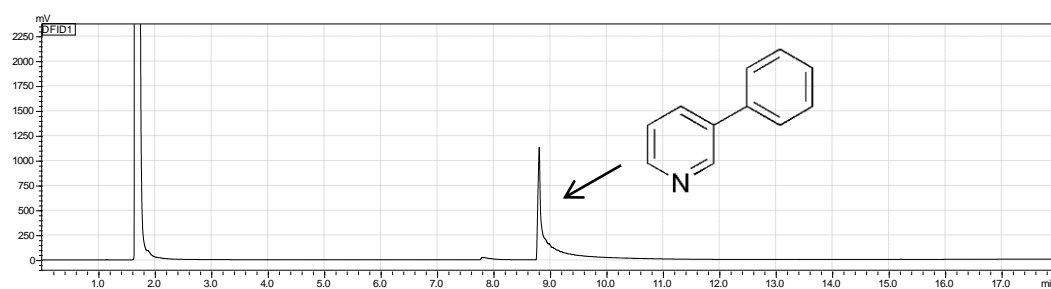

**Fig. S23** GC of the reaction of 3-iodopyridine and phenylboronic acid

**(Table 4, entry 2)**

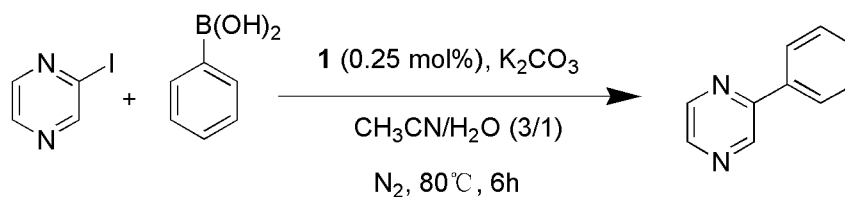

**Scheme S19** 1-catalyzed reaction of iodopyrazine and phenylboronic acid.

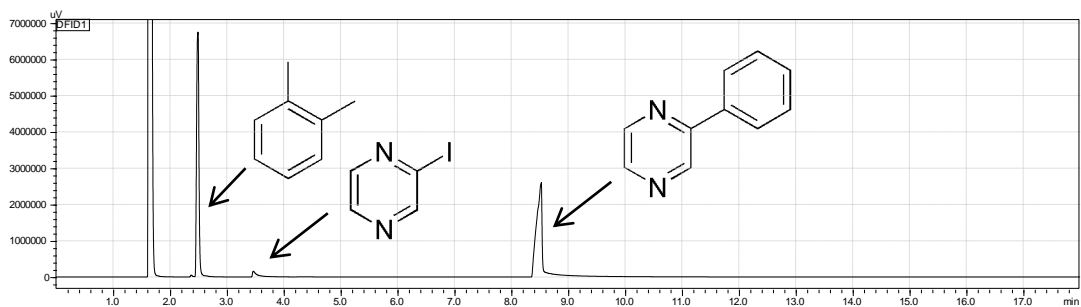

Fig. S24 GC of the reaction of iodopyrazine and phenylboronic acid.

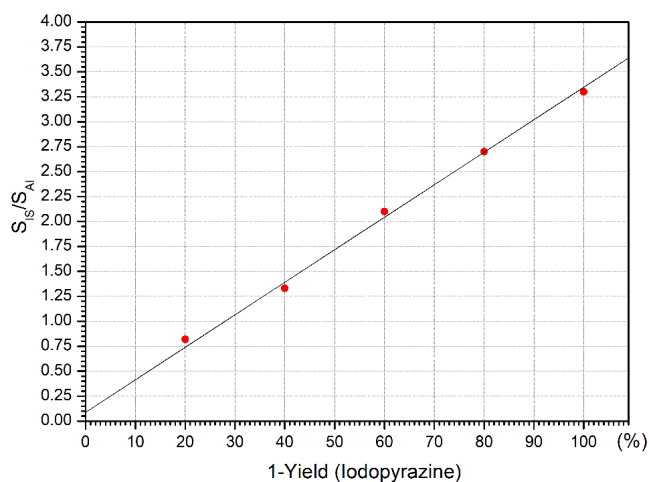

the equation was:  $y=0.151x+0.031$

Fig. S25 Calibration chart of the yield of the reaction of iodopyrazine and phenylboronic acid.

(Table 4, entry 4)

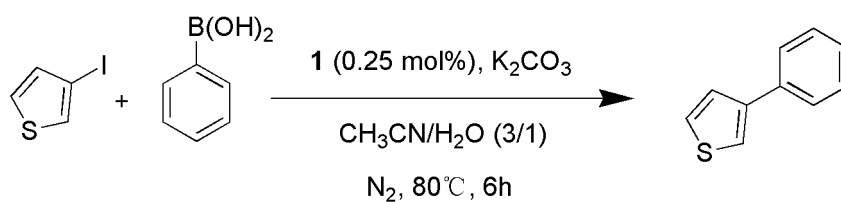

Scheme S20 1-catalyzed reaction of 3-iodothiophene and phenylboronic acid.

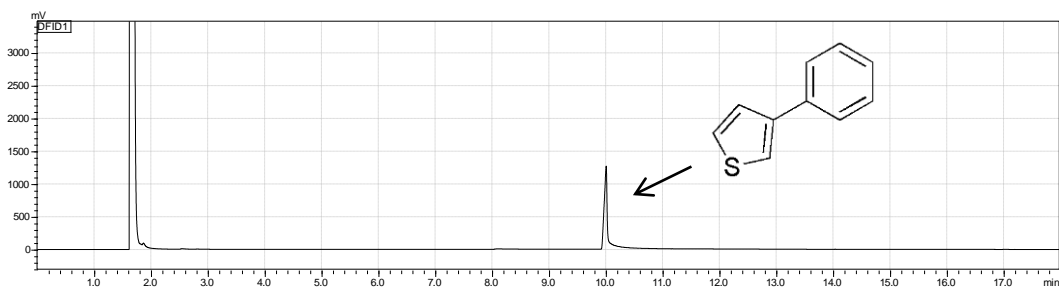

Fig. S26 GC of the reaction of 3-iodothiophene and phenylboronic acid.

(Table 4, entry 5)

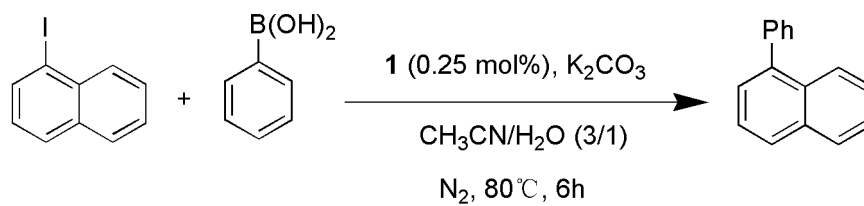

Scheme S21 1-catalyzed reaction of 1-iodonaphthalene and phenylboronic acid.

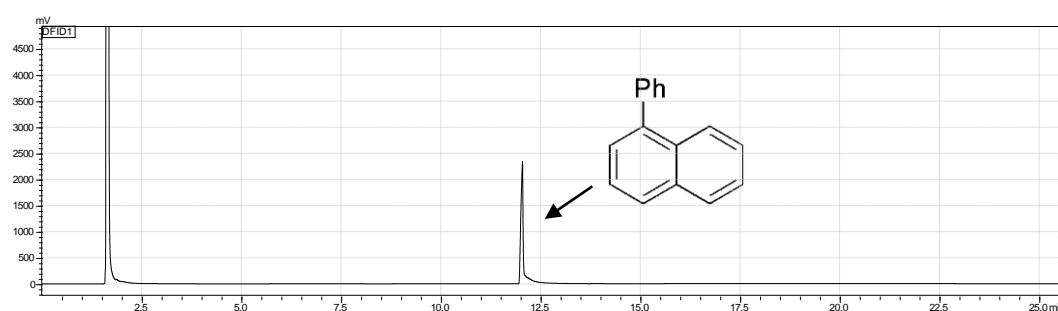

Fig. S27 GC of the reaction of 1-iodonaphthalene and phenylboronic acid.

*Suzuki reaction of iodobenzene with substituted arylboronic acids*

(Table 5, entry 1)

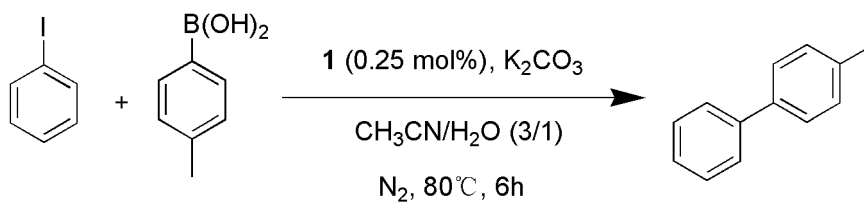

Scheme S22 1-catalyzed reaction of 4-methylphenylboronic acid and iodobenzene.

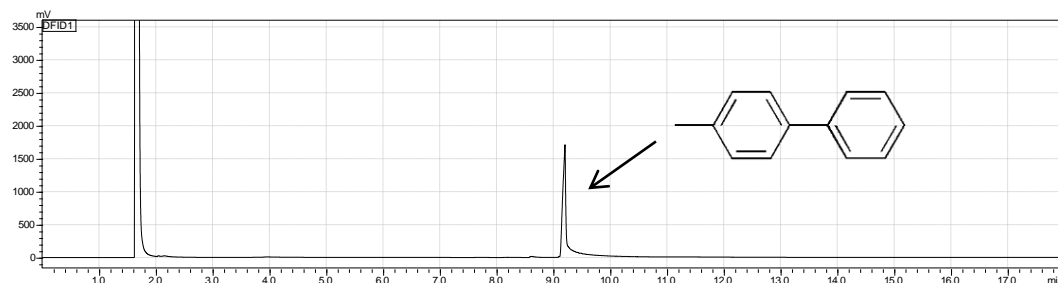

Fig. S28 GC of the reaction of 4-methylphenylboronic acid and iodobenzene.

(Table 5, entry 2)

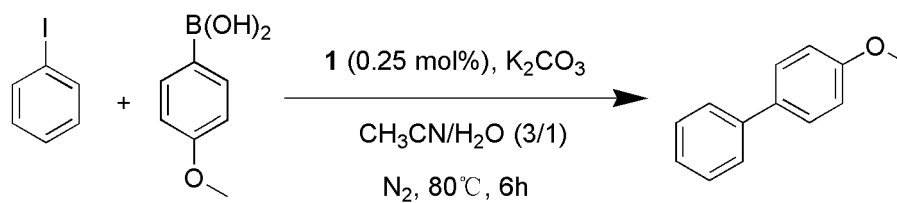

Scheme S23 1-catalyzed reaction of 4-methoxyphenylboronic acid and iodobenzene.

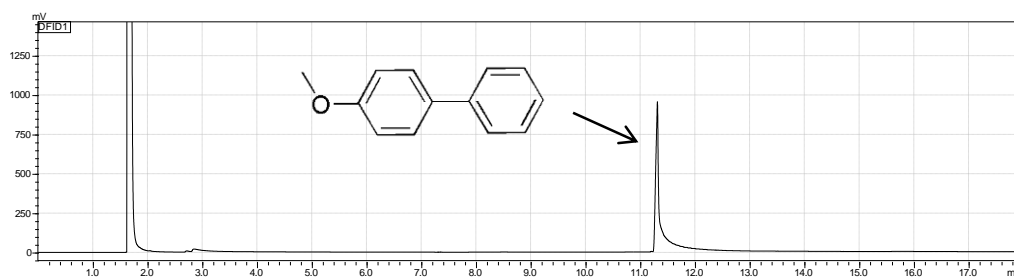

Fig. S29 GC of the reaction of 4-methoxyphenylboronic acid and iodobenzene.

(Table 5, entry 3)

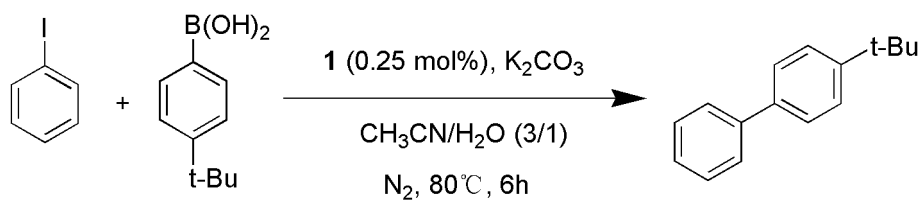

Scheme S24 1-catalyzed reaction of 4-tert-butylphenylboronic acid and iodobenzene.

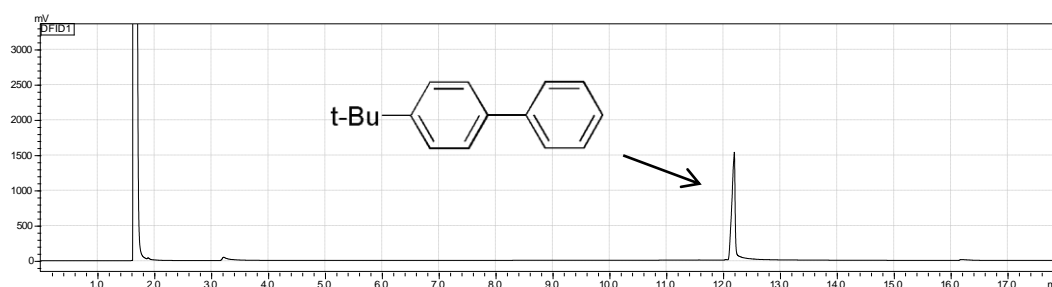

Fig. S30 GC of the of 4-tert-butylphenylboronic acid and iodobenzene.

(Table 5, entry 4)

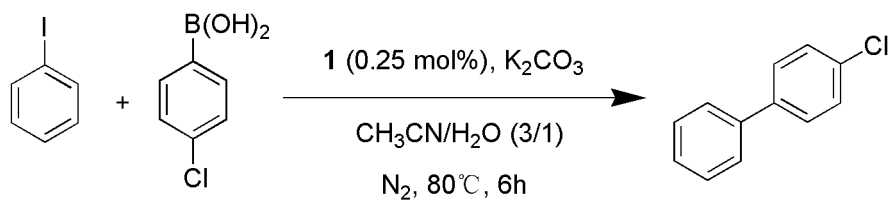

Scheme S25 1-catalyzed reaction of 4-chlorophenylboronic acid and iodobenzene.

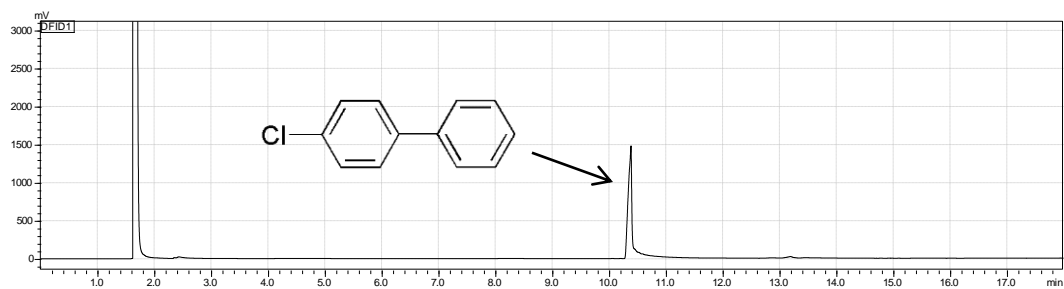

Fig. S31 GC of the reaction of 4-chlorophenylboronic acid and iodobenzene.

(Table 5, entry 5)

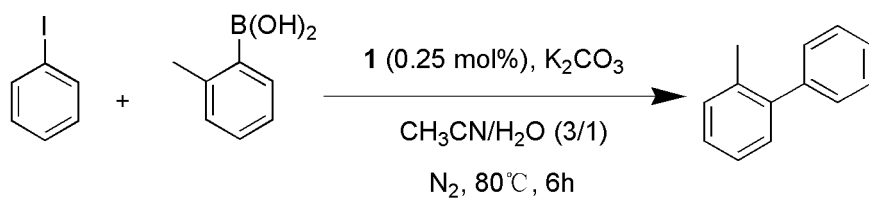

Scheme S26 1-catalyzed reaction of 2-methylphenylboronic acid and iodobenzene.

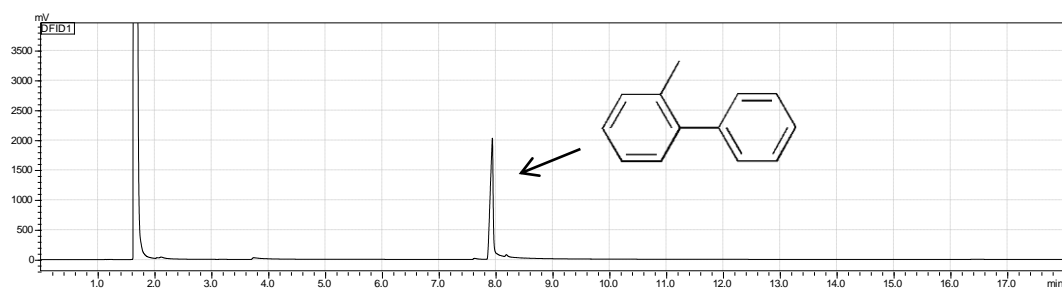

Fig. S32 GC of the reaction of 2-methylphenylboronic acid and iodobenzene.

(Table 5, entry 6)

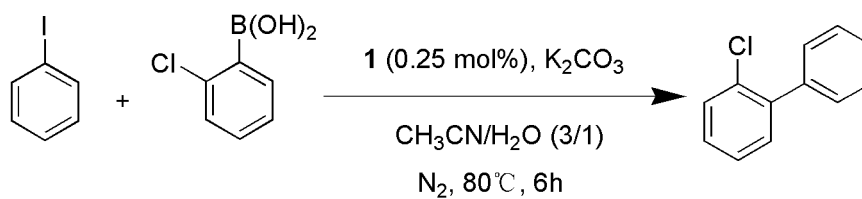

Scheme S27 **1**-catalyzed the reaction of 2-chlorophenylboronic acid and iodobenzene.

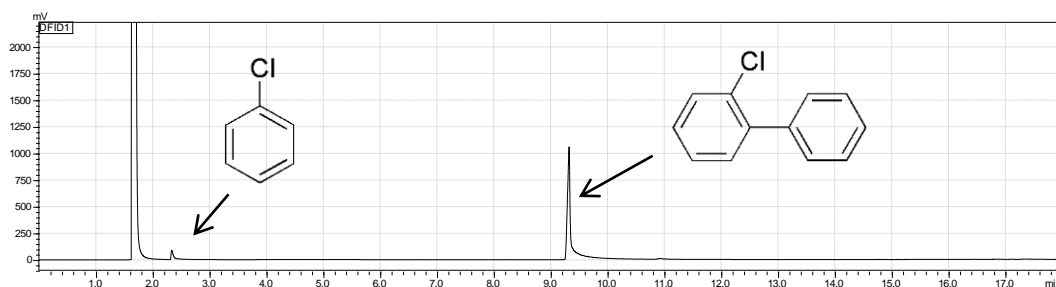

Fig. S33 GC of the reaction of 2-chlorophenylboronic acid and iodobenzene.

(Table 5, entry 7)

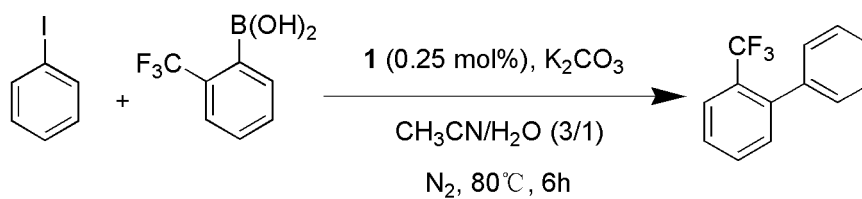

Scheme S28 **1**-catalyzed reaction of 2-(trifluoromethyl)phenylboronic acid and iodobenzene.

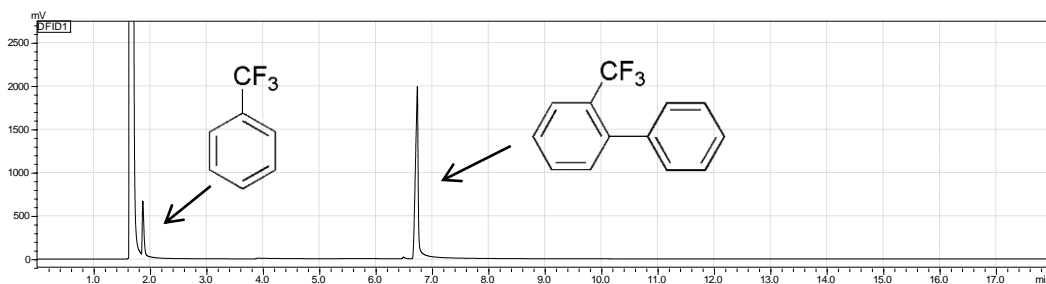

Fig. S34 GC of the reaction of 2-(trifluoromethyl)phenylboronic acid and iodobenzene.

(Table 5, entry 8)

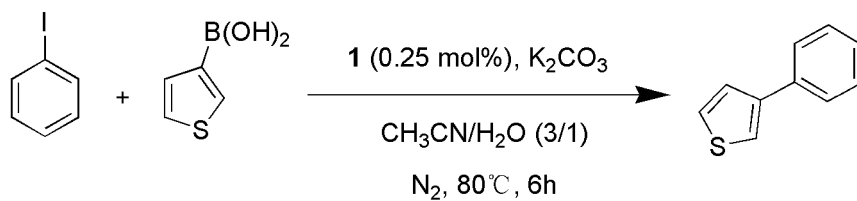

Scheme S29 1-catalyzed reaction of 3-thiopheneboronic acid and iodobenzene

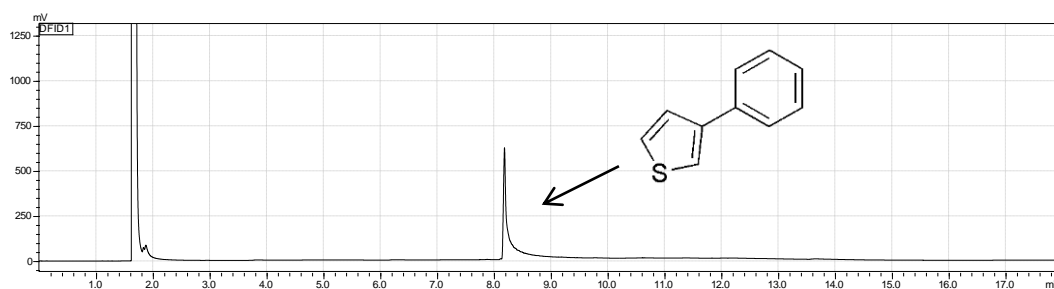

Fig. S35 GC of the reaction of 3-thiopheneboronic acid and iodobenzene.

(Table 3, entry 9)

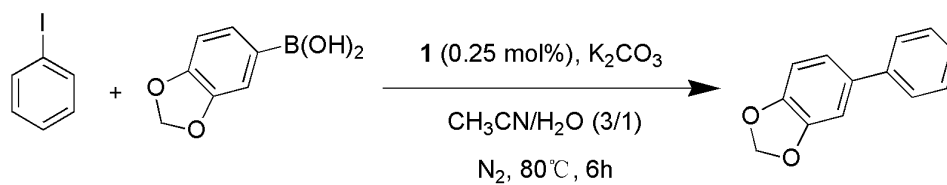

Scheme S30 1-catalyzed reaction of 3,4-(methylenedioxy)benzeneboronic acid and iodobenzene.

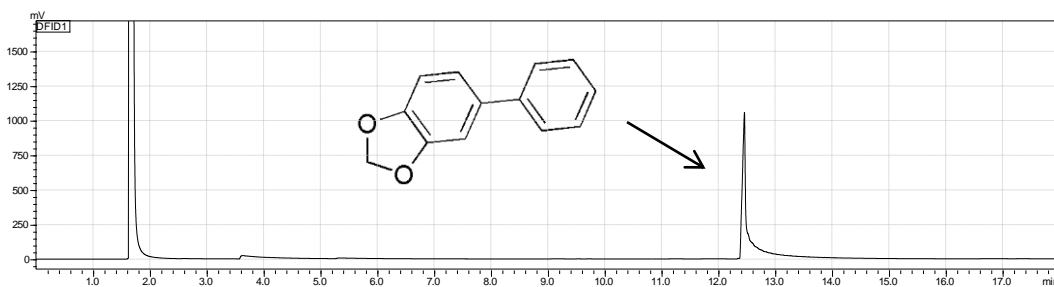

Fig. S36 GC of the reaction of 3,4-(methylenedioxy)benzeneboronic acid and iodobenzene.

Suzuki reaction of heterocyclic aryl iodide s with heterocyclic arylboronic acids

(Table 5, entry 11)

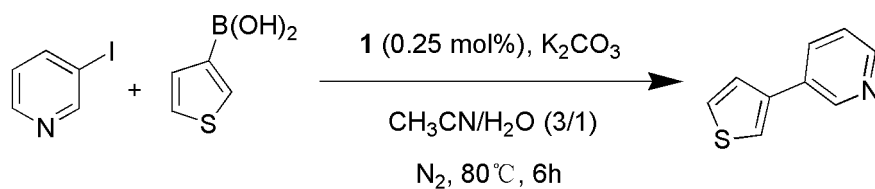

Scheme S31 1-catalyzed reaction of 3-iodopyridine and 3-thiopheneboronic acid.

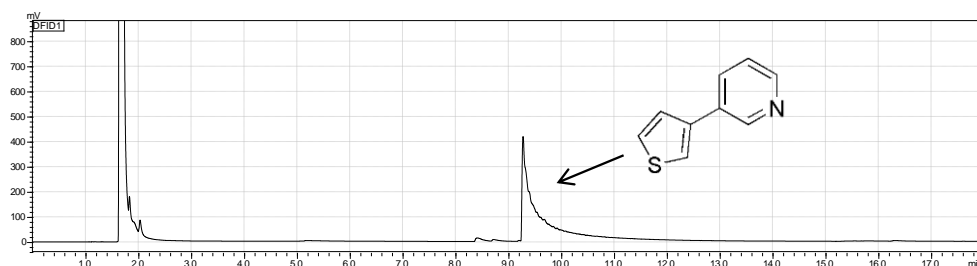

Fig. S37 GC of the reaction of 3-iodopyridine and 3-thiopheneboronic acid.

(Table 3, entry 12)

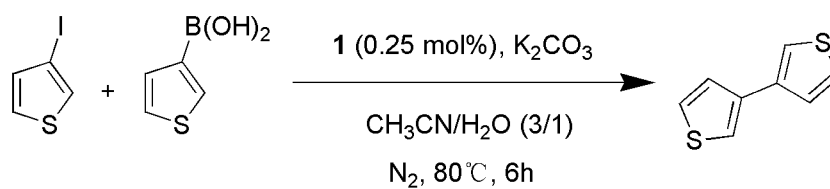

Scheme S32 1-catalyzed reaction of 3-iodothiophene and 3-thiopheneboronic acid.

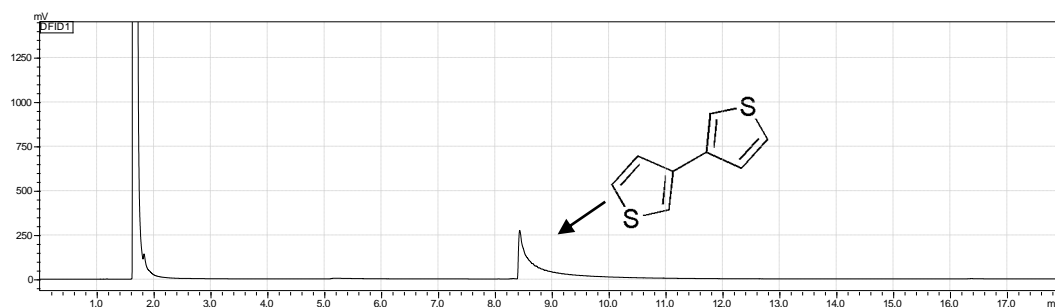

Fig. S38 GC of the reaction of 3-iodothiophene and 3-thiopheneboronic acid.



(Table 5, entry 13)

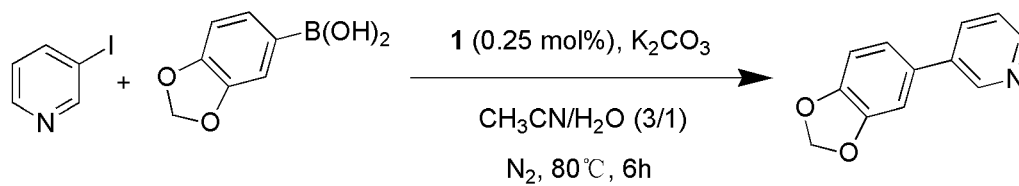

**Scheme S33** 1-catalyzed reaction of 3-iodopyridine and 3,4-(methylenedioxy)benzeneboronic acid.

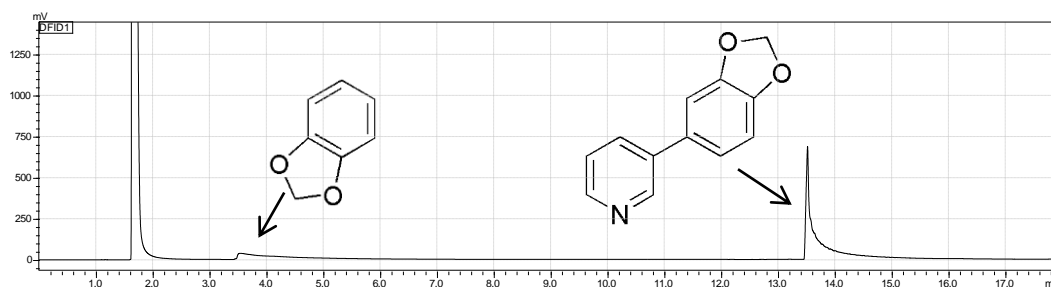

**Fig. S39** GC of the reaction of 3-iodopyridine and 3,4-(methylenedioxy)benzeneboronic acid.

(Table 5, entry 14)

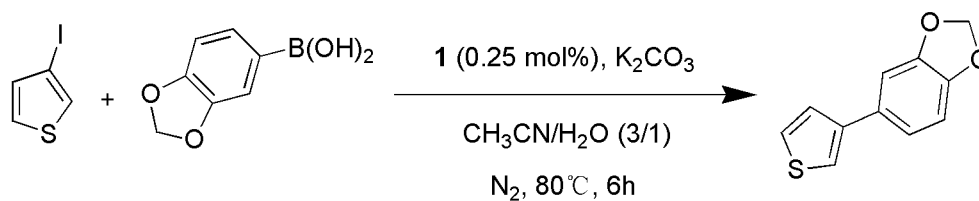

**Scheme S34** 1-catalyzed reaction of 3-iodothiophene and 3,4-(methylenedioxy)benzeneboronic acid.

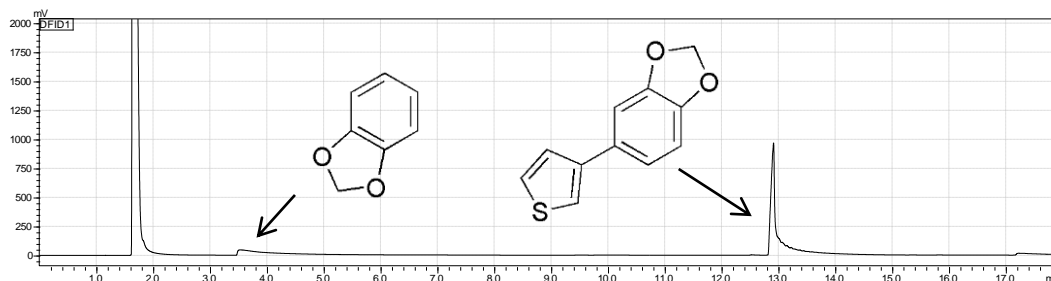

**Fig. S40** GC of the reaction of 3-iodothiophene and 3,4-(methylenedioxy)benzeneboronic acid.

**GC-MS of the reaction of 1-bromo-4-iodobenzene and phenylboronic acid catalyzed by four common palladium catalysts**

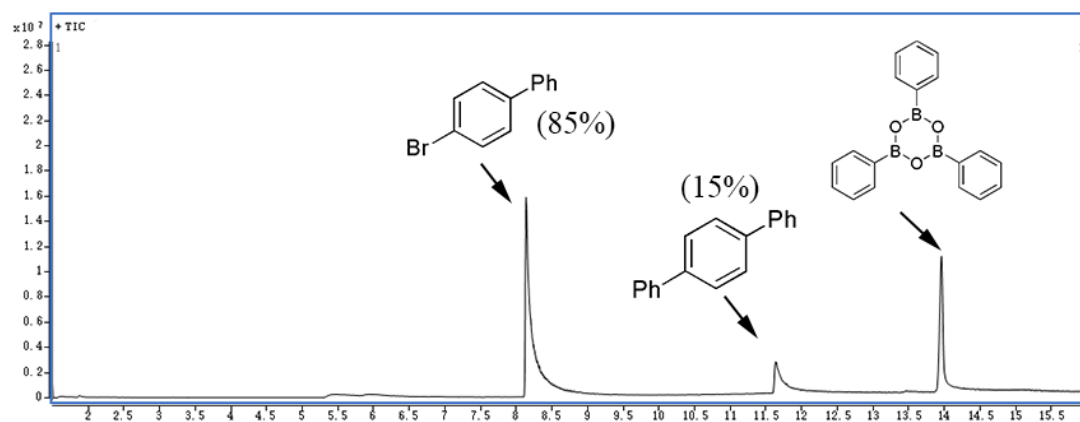

**Fig. S41** GC-MS of the reaction catalyzed by Pd(dba)<sub>2</sub>.

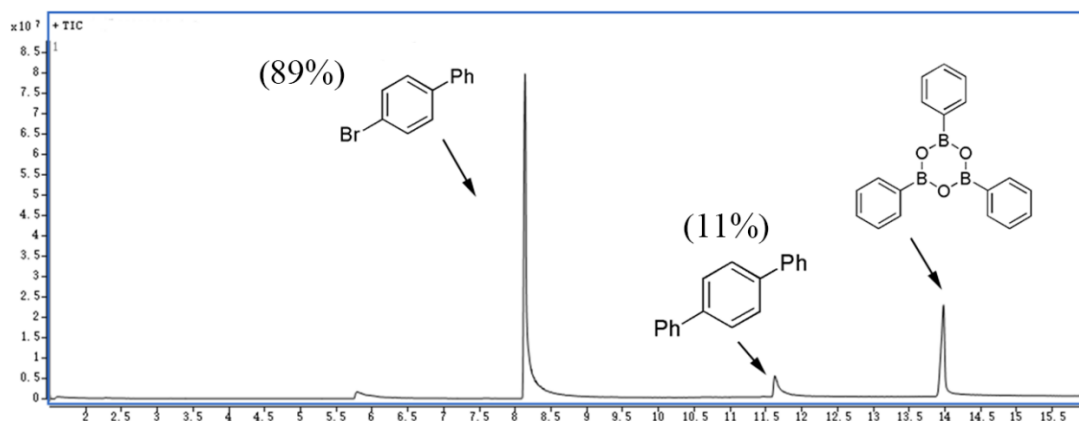

**Fig. S42** GC-MS of the reaction catalyzed by Pd(PPh<sub>3</sub>)<sub>4</sub>.

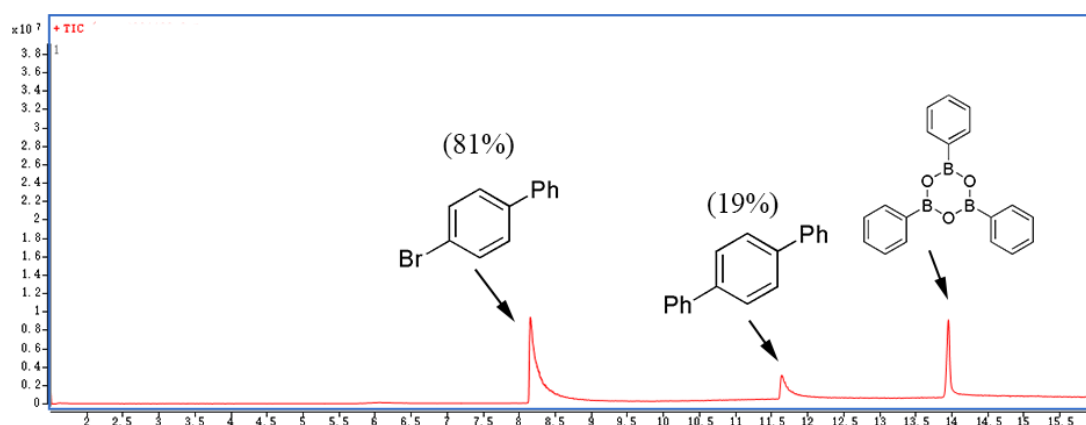

**Fig. S43** GC-MS of the reaction catalyzed by Pd(OAc)<sub>2</sub>.

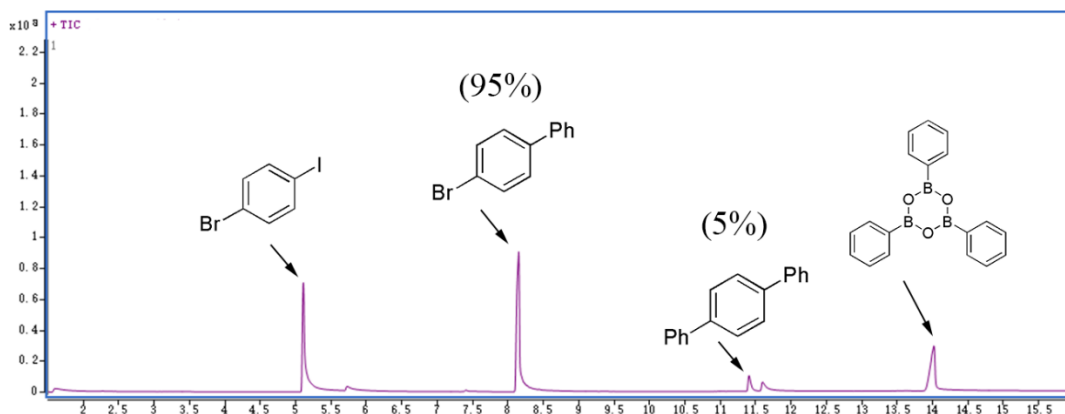

Fig. S44 GC-MS of the reaction catalyzed by Pd(PPh)<sub>2</sub>Cl<sub>2</sub>.

GC of the reaction of 1-chloro-4-iodobenzene and phenylboronic acid catalyzed by **1**

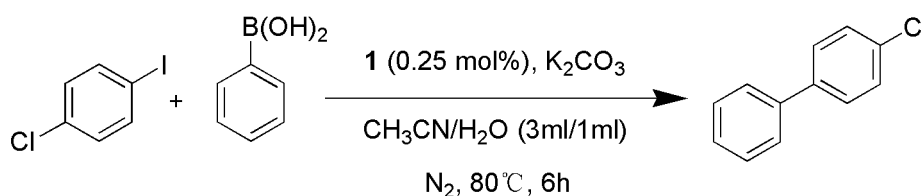

Scheme S35 **1**-catalyzed reaction of 1-chloro-4-iodobenzene and phenylboronic acid.

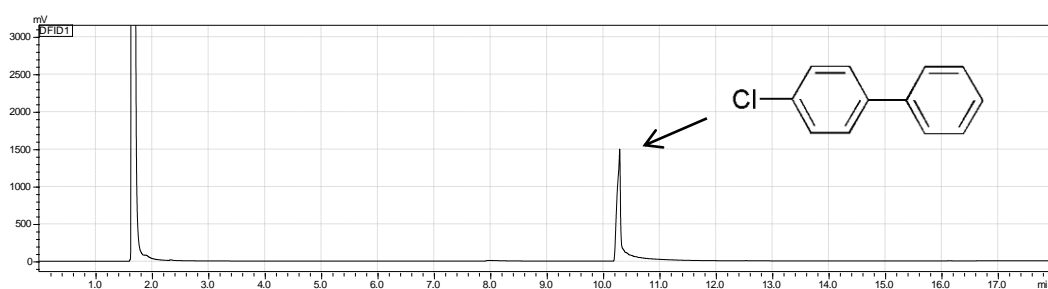

Fig. S45 GC of the reaction of 1-chloro-4-iodobenzene and phenylboronic acid.

## 8. Mechanism investigation

Experiments were designed to react **1** with iodobenzene and phenylboronic acid, respectively in the presence of K<sub>2</sub>CO<sub>3</sub> and monitored the changes by HRMS. After **1** reacted with iodobenzene for 2h, HRMS showed a new peak at 1256.9313 which was consistent with an iodine inserted palladium dimer Pd<sub>2</sub>I(PAr<sub>3</sub>)<sub>2</sub>(SAr')<sub>2</sub> (Ar=4-F-C<sub>6</sub>H<sub>4</sub>, Ar'=4-Cl-C<sub>6</sub>H<sub>4</sub>). However, no changes were observed in the reaction of **1** with phenylboronic acid.

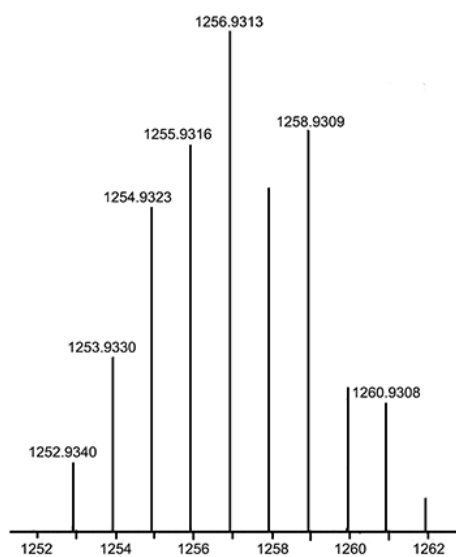

Fig. S46 HRMS of the  $[Pd_3]^+$  (**1**) reacts with iodobenzene in the presence of  $K_2CO_3$ : 10  $\mu$ L (0.1 mmol) iodobenzene, 2.4 mg (0.00125 mmol) **1**,  $K_2CO_3$  0.0138 g (0.1 mmol) and 3 mL  $CH_2Cl_2$ , rt, 2 h.

## 9. NMR spectra

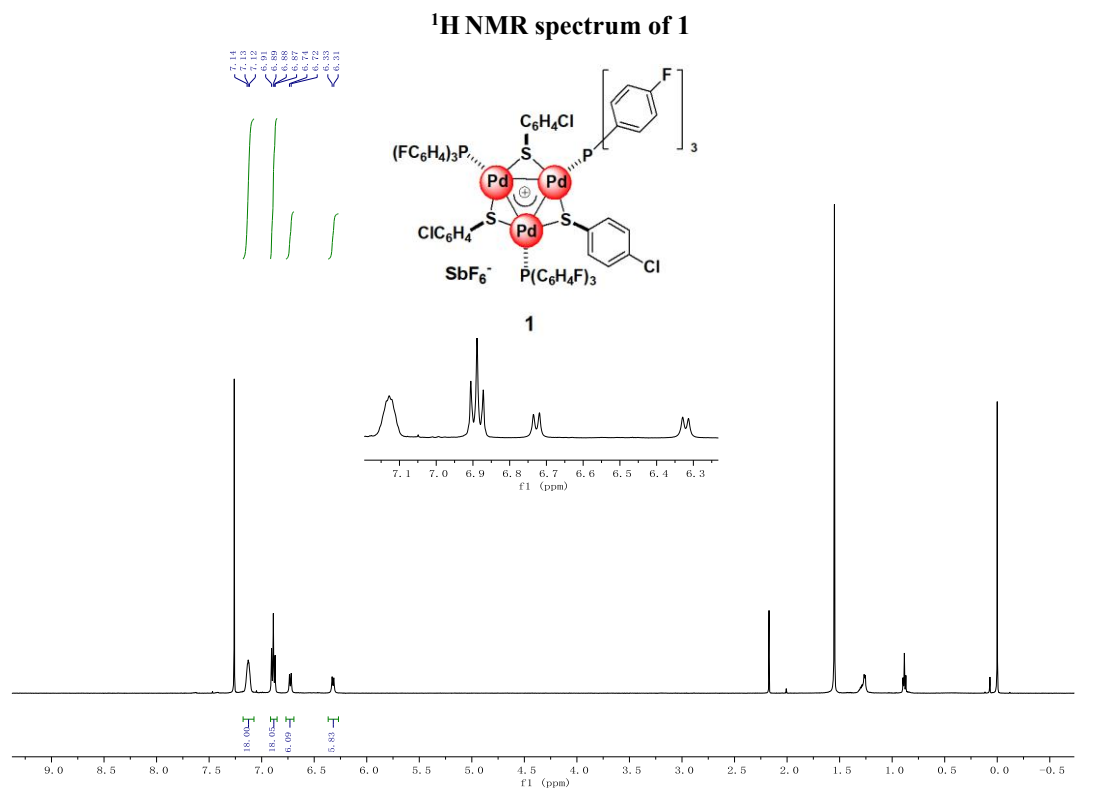

### $^{13}\text{C}$ NMR spectrum of 1

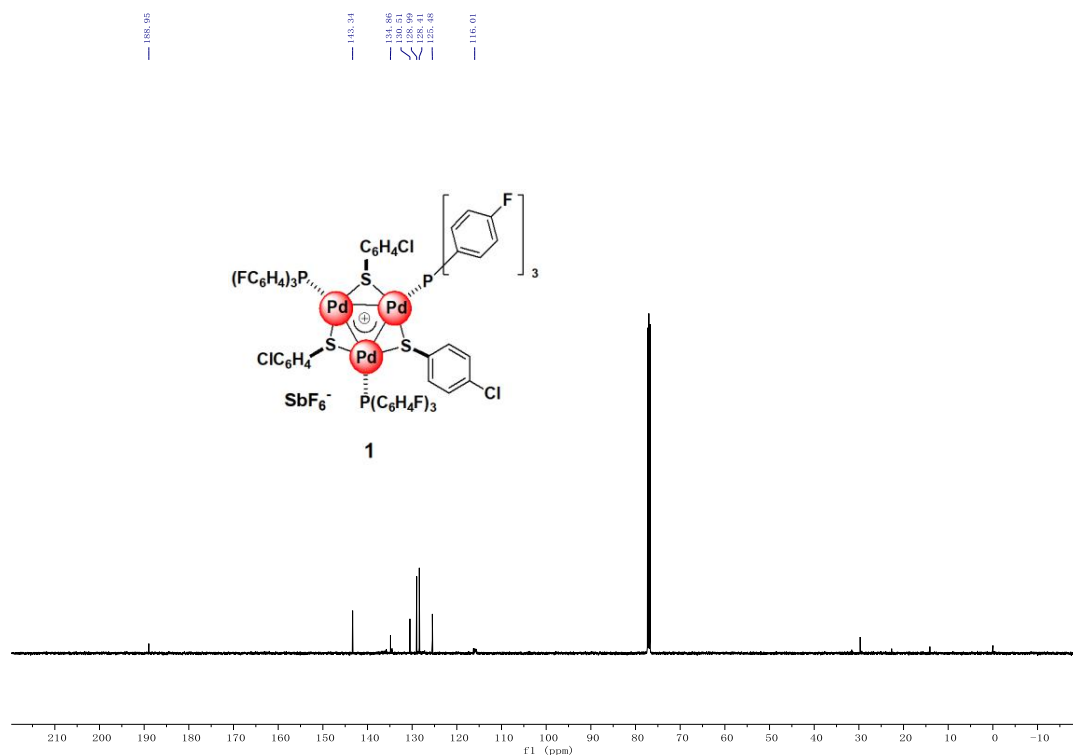

### $^{31}\text{P}$ NMR spectrum of 1

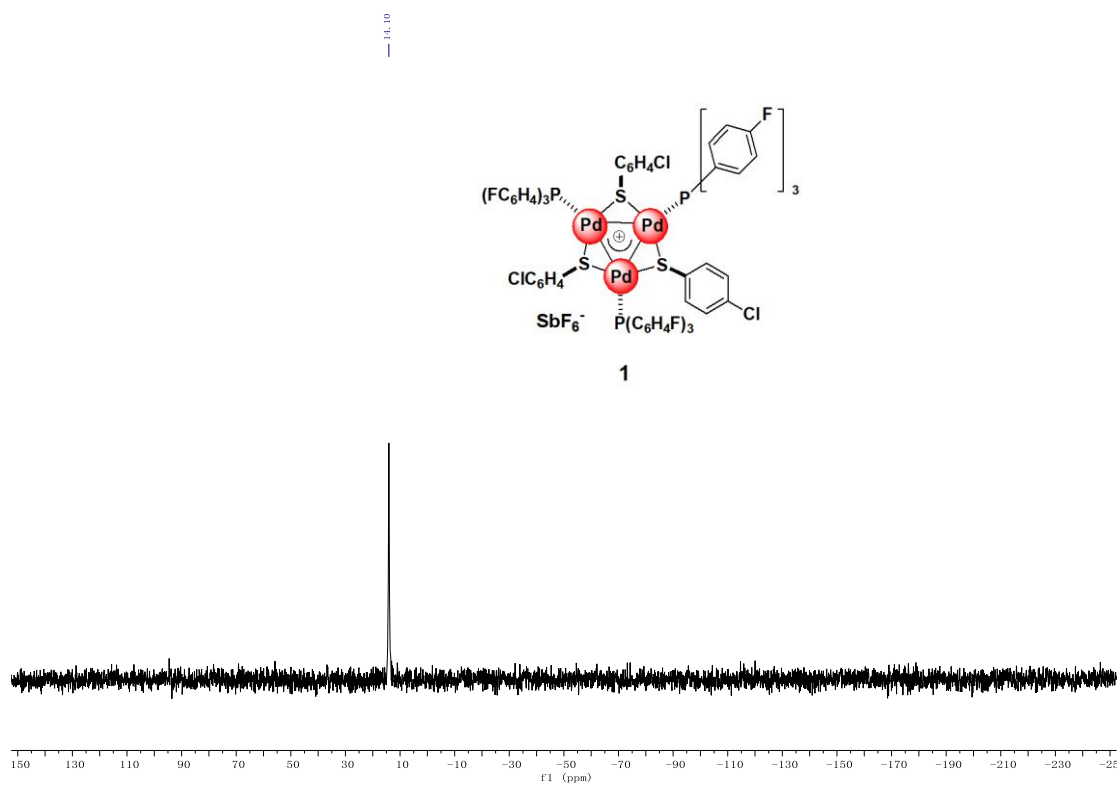

## $^1\text{H}$ NMR spectrum of **2**

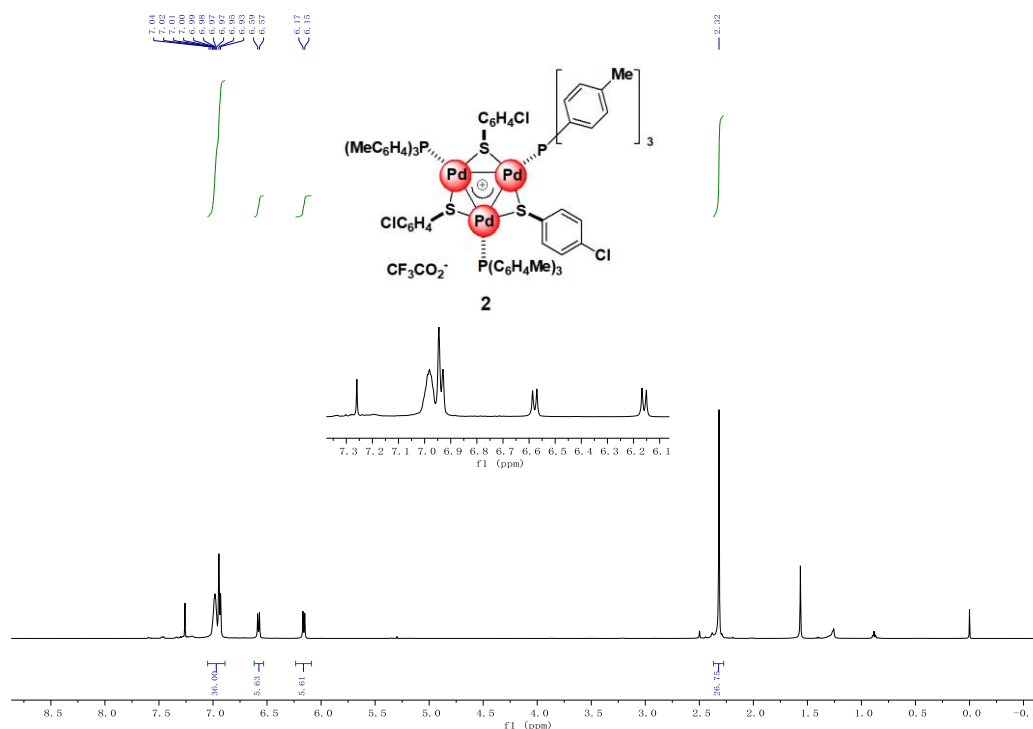

$^1\text{H}$  NMR (500 MHz, Chloroform-*d*)  $\delta$  7.05 – 6.89 (m, 36H), 6.58 (d,  $J$  = 8.2 Hz, 6H), 6.16 (d,  $J$  = 8.3 Hz, 6H), 2.32 (s, 27H).

## $^{13}\text{C}$ NMR spectrum of **2**

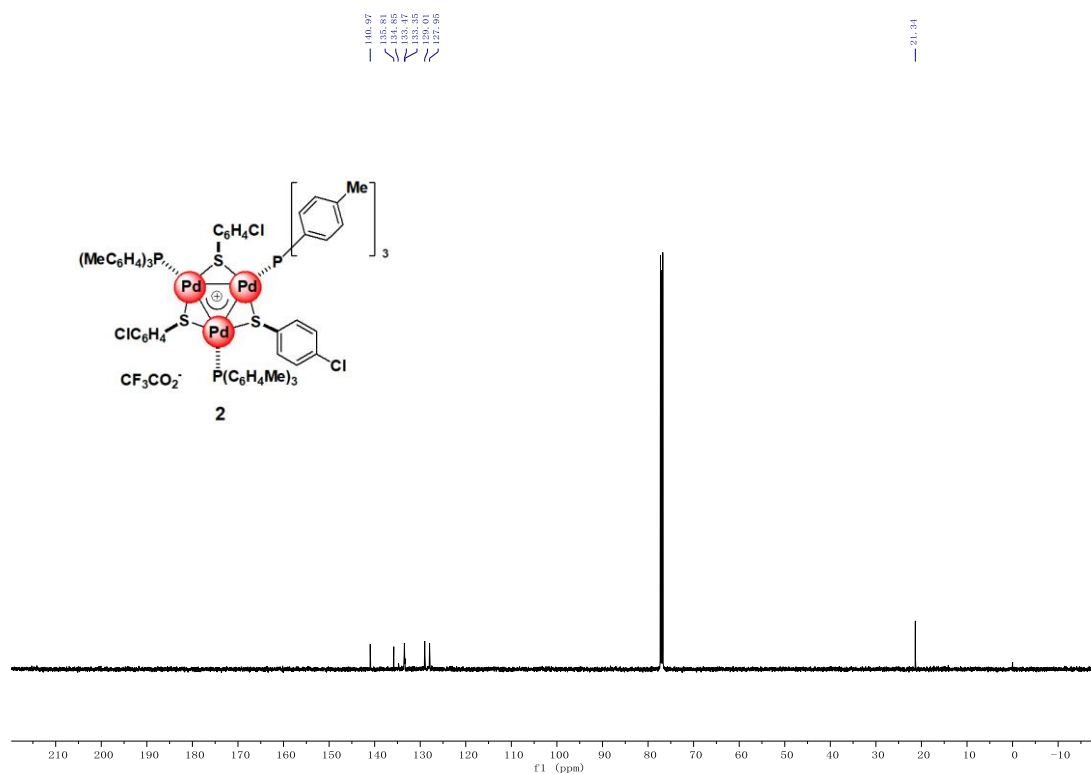

$^{13}\text{C}$  NMR (126 MHz, Chloroform-*d*)  $\delta$  140.97, 135.81, 134.85, 133.47, 133.35, 129.01, 127.95, 21.34.

### $^{31}\text{P}$ NMR spectrum of 2

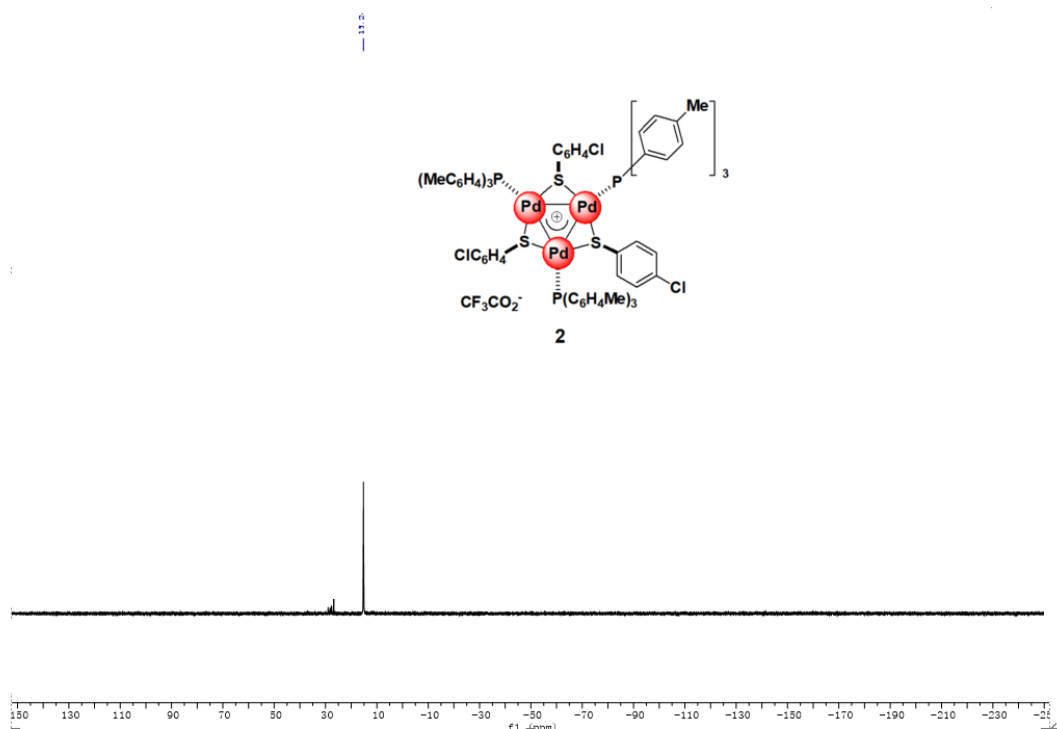

$^{31}\text{P}$  NMR (202 MHz, Chloroform-*d*)  $\delta$  15.24.

### $^1\text{H}$ NMR spectrum of 3

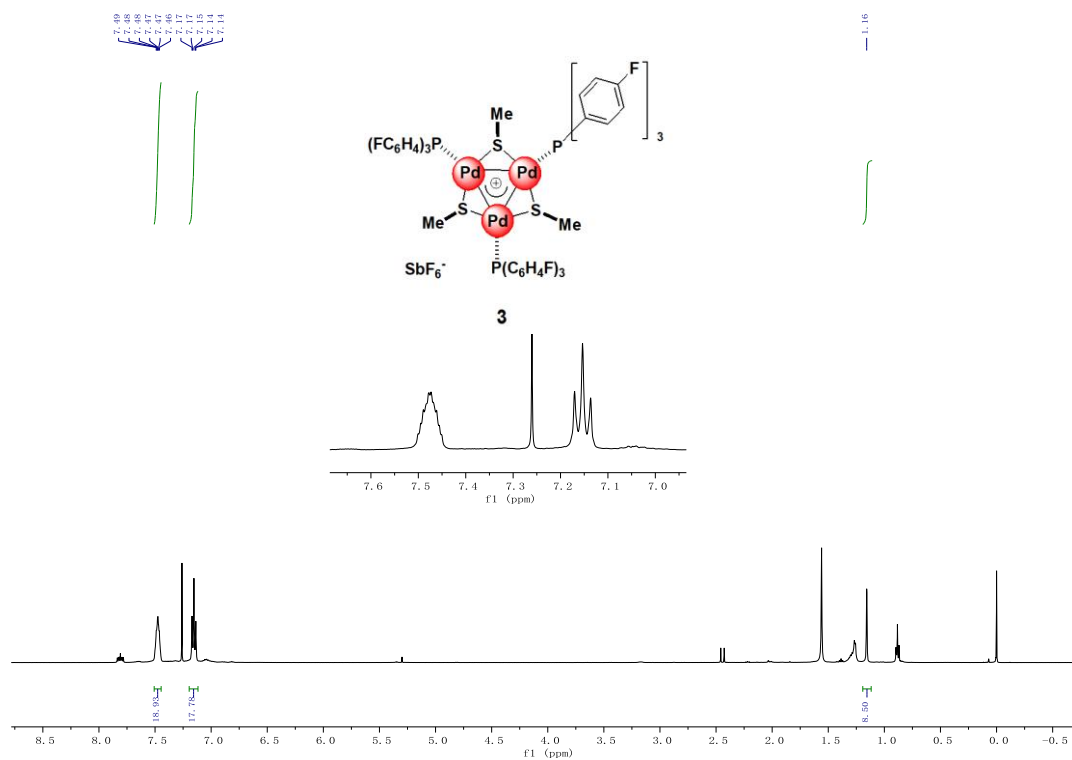

$^1\text{H}$  NMR (500 MHz, Chloroform-*d*)  $\delta$  7.49–7.46 (m, 18H), 7.15 (t, *J* = 8.5 Hz, 18H), 1.16 (s, 9H).

### <sup>13</sup>C NMR spectrum of 3

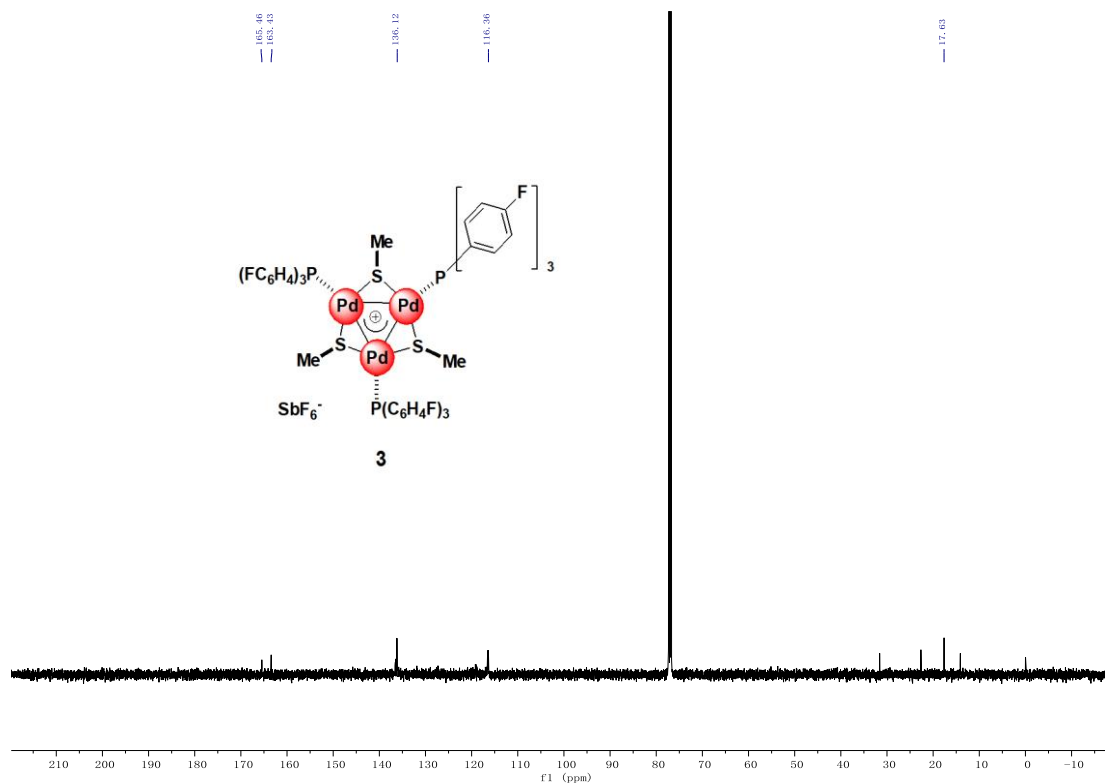

### <sup>31</sup>P NMR spectrum of 3

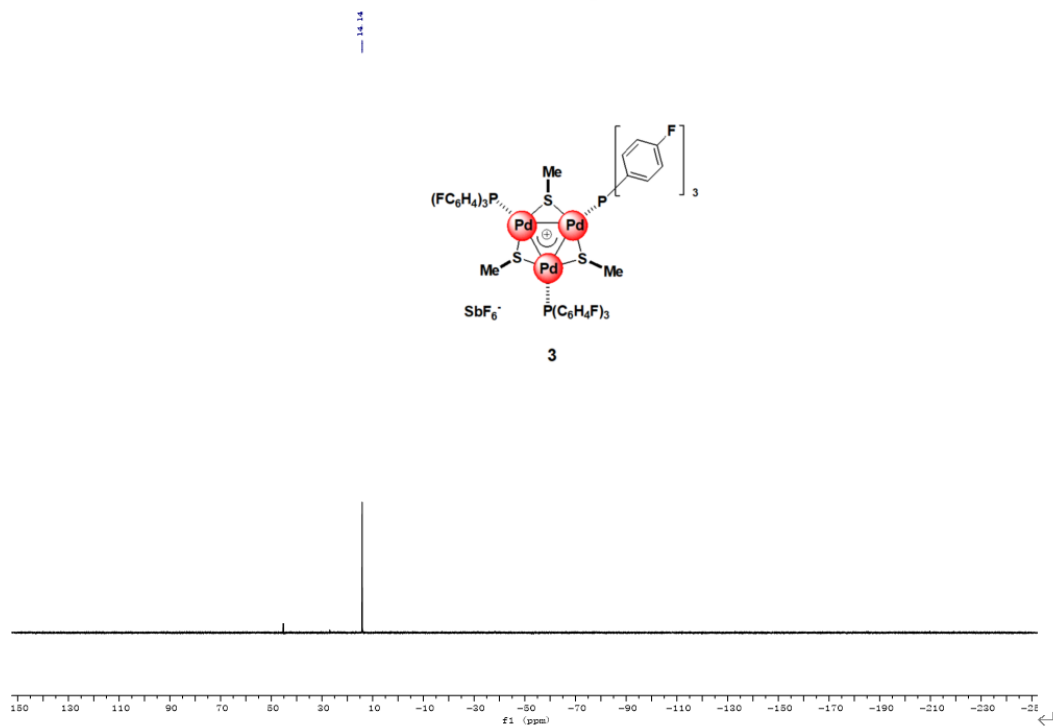



### <sup>1</sup>H NMR spectrum of 4

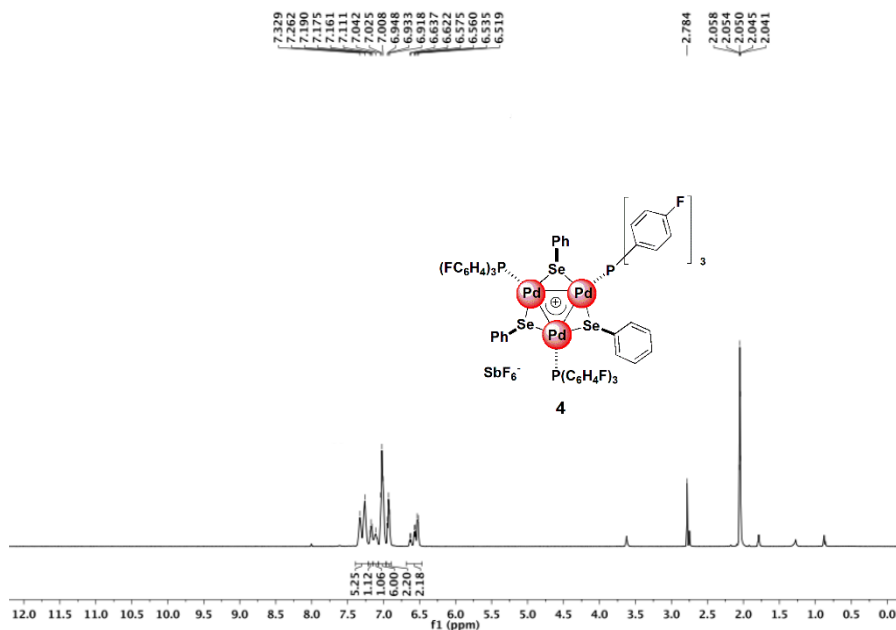

<sup>1</sup>H NMR (500 MHz, Chloroform-*d*):  $\delta$  7.57-7.31 (m, 18H), 7.23 (t, *J* = 7.6 Hz, 3H), 6.98 (t, *J* = 8.5 Hz, 18H), 6.91 (t, *J* = 7.6 Hz, 6H), 6.28 (d, *J* = 7.6 Hz, 6H).

### <sup>13</sup>C NMR spectrum of 4

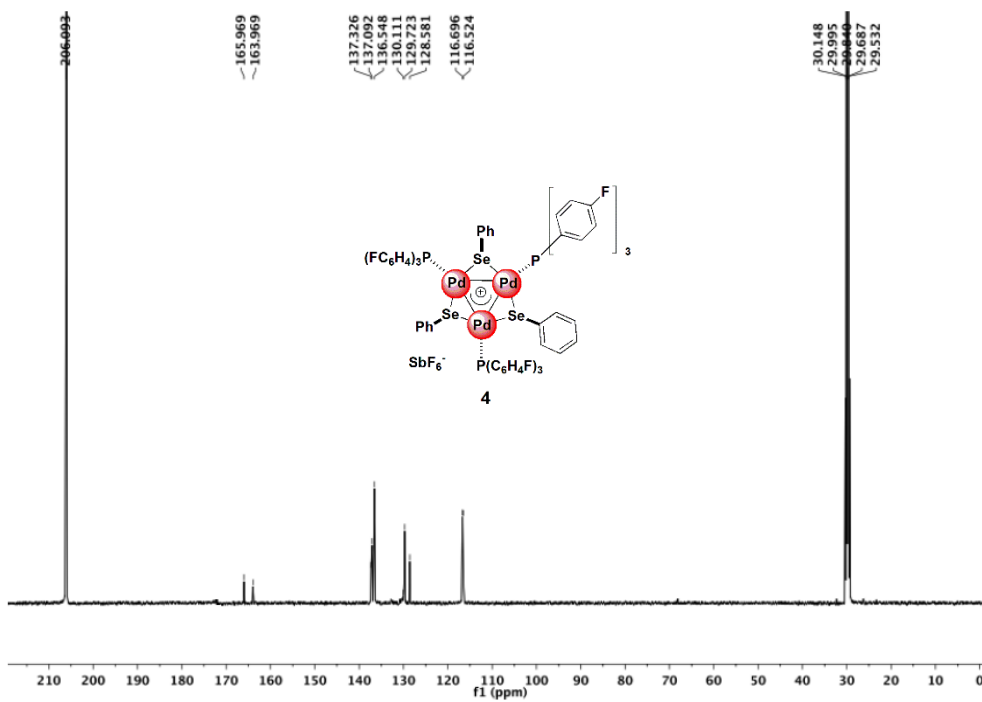

<sup>13</sup>C NMR (126 MHz, Chloroform-*d*):  $\delta$  165.0, 137.8, 137.3, 135.8, 129.4, 129.0, 128.4, 116.4.

(Table 1, entry 7)

**<sup>1</sup>H NMR spectrum of 4-Acetylbiphenyl**

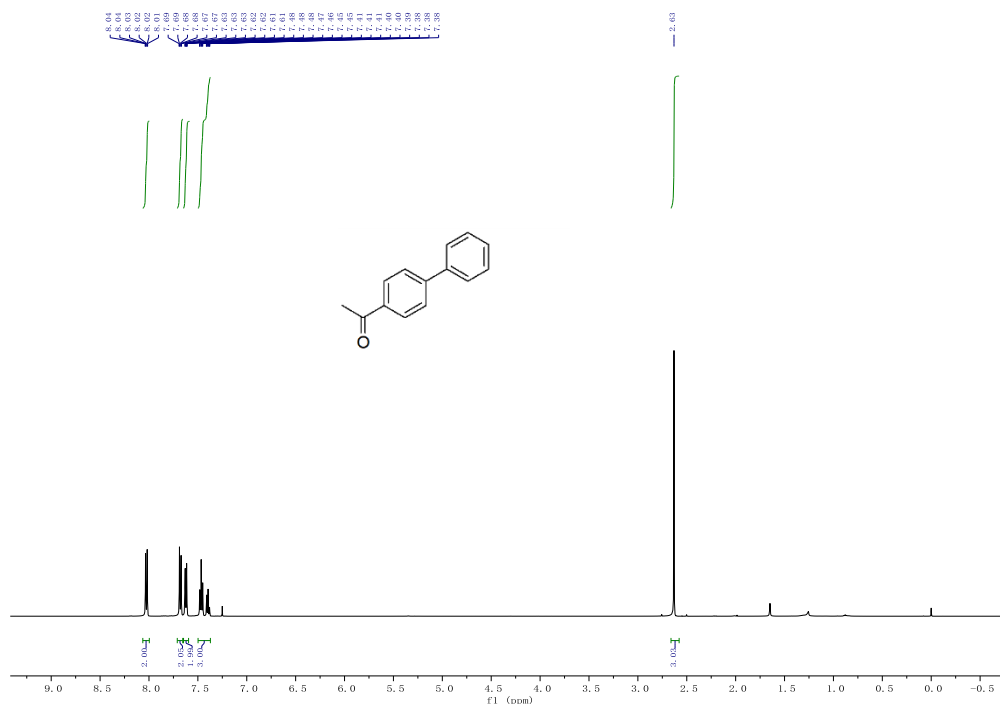

<sup>1</sup>H NMR (500 MHz, Chloroform-*d*) δ 8.06 – 8.00 (m, 2H), 7.71 – 7.65 (m, 2H), 7.65 – 7.60 (m, 2H), 7.50 – 7.37 (m, 3H), 2.63 (s, 3H).

**<sup>13</sup>C NMR spectrum of 4-Acetylbiphenyl**

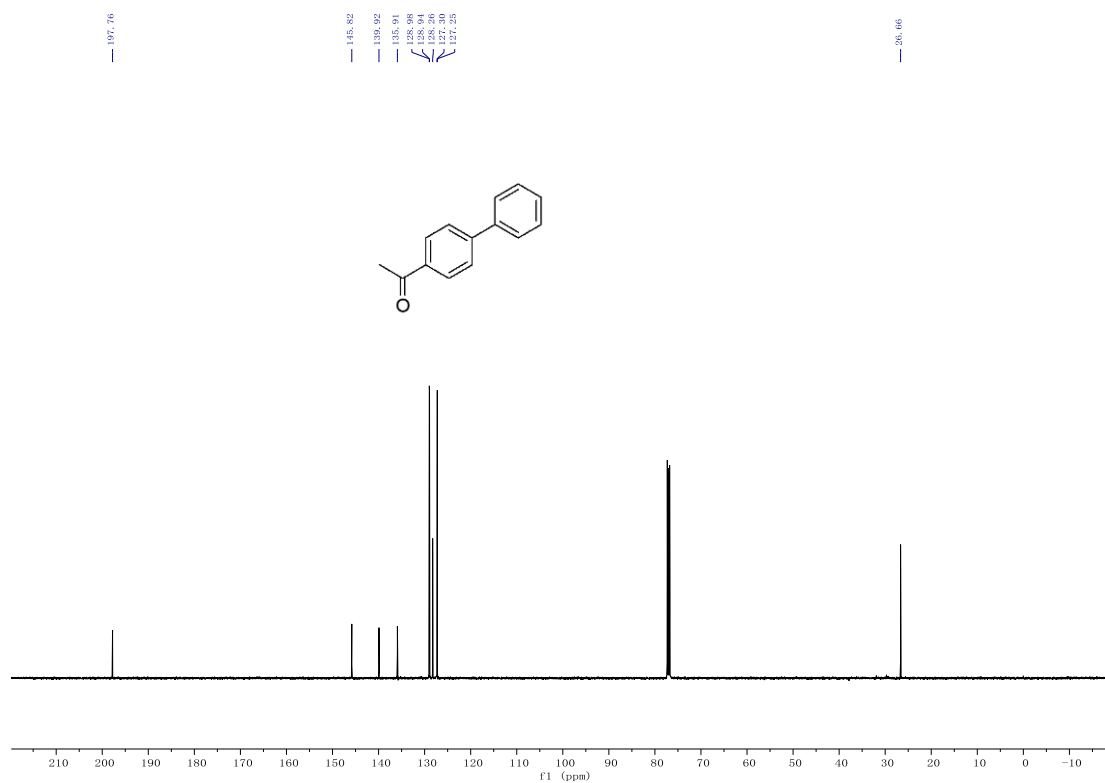

<sup>13</sup>C NMR (126 MHz, Chloroform-*d*) δ 197.7, 145.8, 139.9, 135.9, 128.9, 128.9, 128.2, 127.3, 127.2, 26.6.

(Table 2, entry 3)

<sup>1</sup>H NMR spectrum of 4-Bromobiphenyl

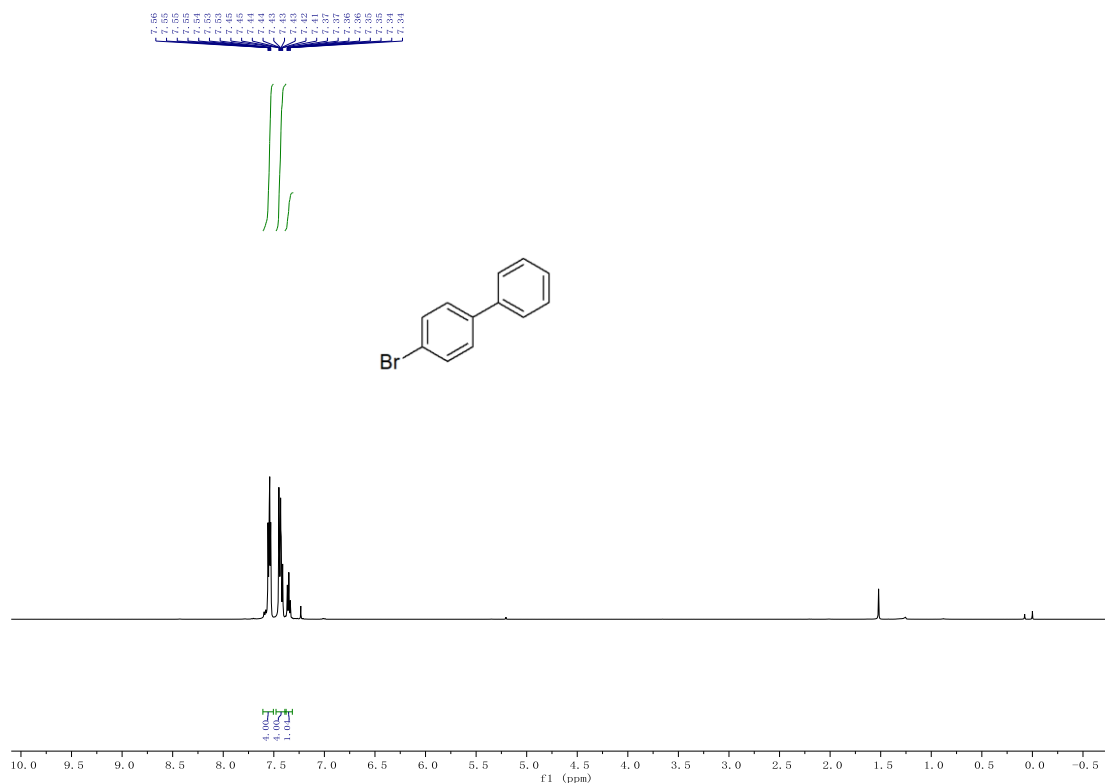

<sup>1</sup>H NMR (500 MHz, Chloroform-*d*) δ 7.61 – 7.50 (m, 4H), 7.46 – 7.39 (m, 4H), 7.38 – 7.32 (m, 1H).

<sup>13</sup>C NMR spectrum of 4-Bromobiphenyl

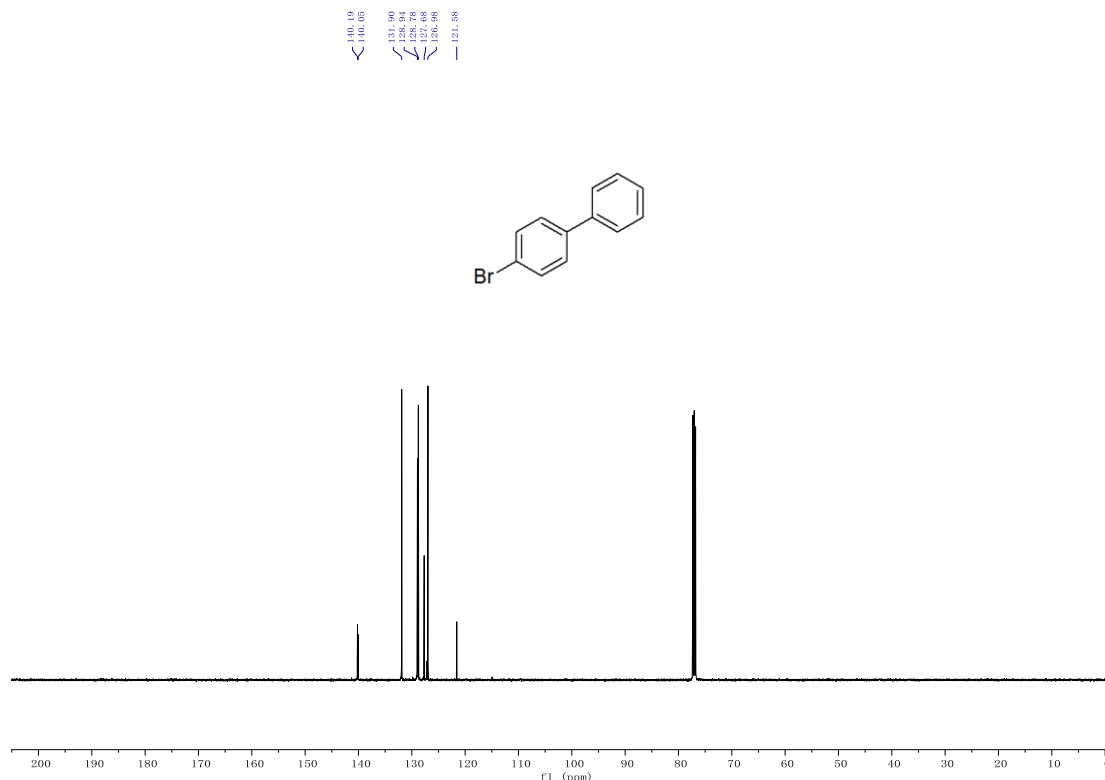

<sup>13</sup>C NMR (126 MHz, Chloroform-*d*) δ 140.2, 140.1, 131.9, 128.9, 128.7, 127.6, 126.9, 121.5.

(Table 2, entry 3)

### $^1\text{H}$ NMR spectrum of *p*-Terophenyl

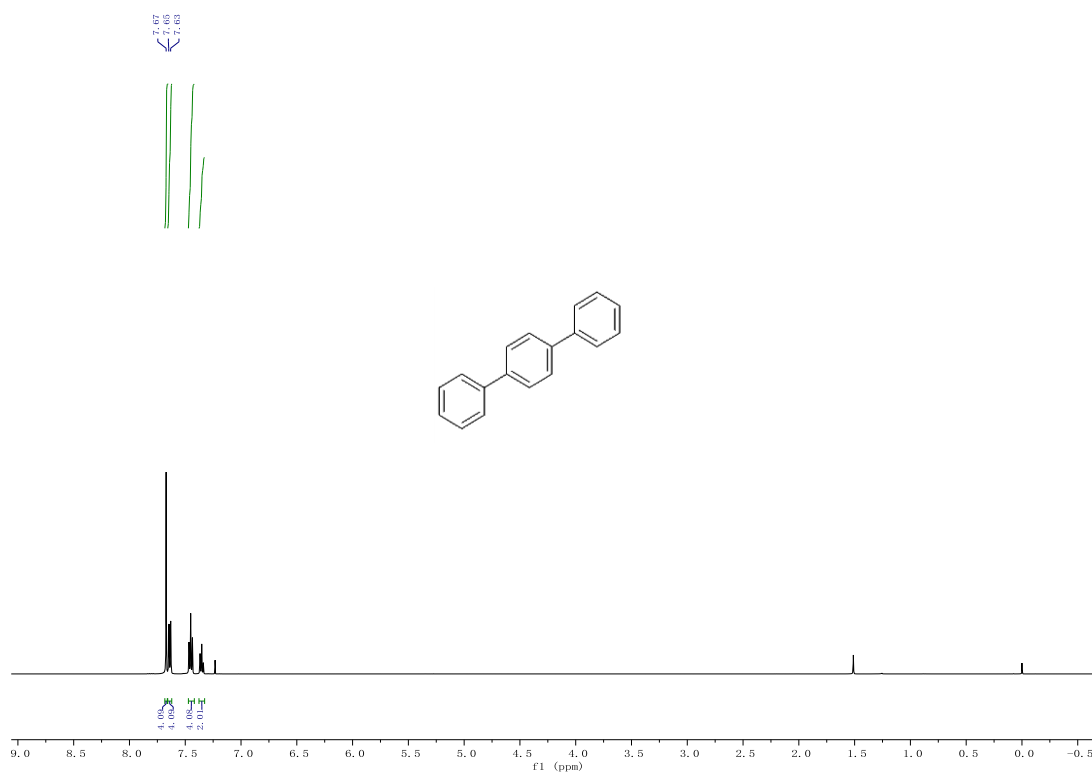

$^1\text{H}$  NMR (500 MHz, Chloroform-*d*)  $\delta$  7.67 (s, 4H), 7.64 (d,  $J = 8.7$  Hz, 4H), 7.45 (dd,  $J = 8.4, 7.0$  Hz, 4H), 7.38 – 7.33 (m, 2H).

### $^{13}\text{C}$ NMR spectrum of *p*-Terophenyl

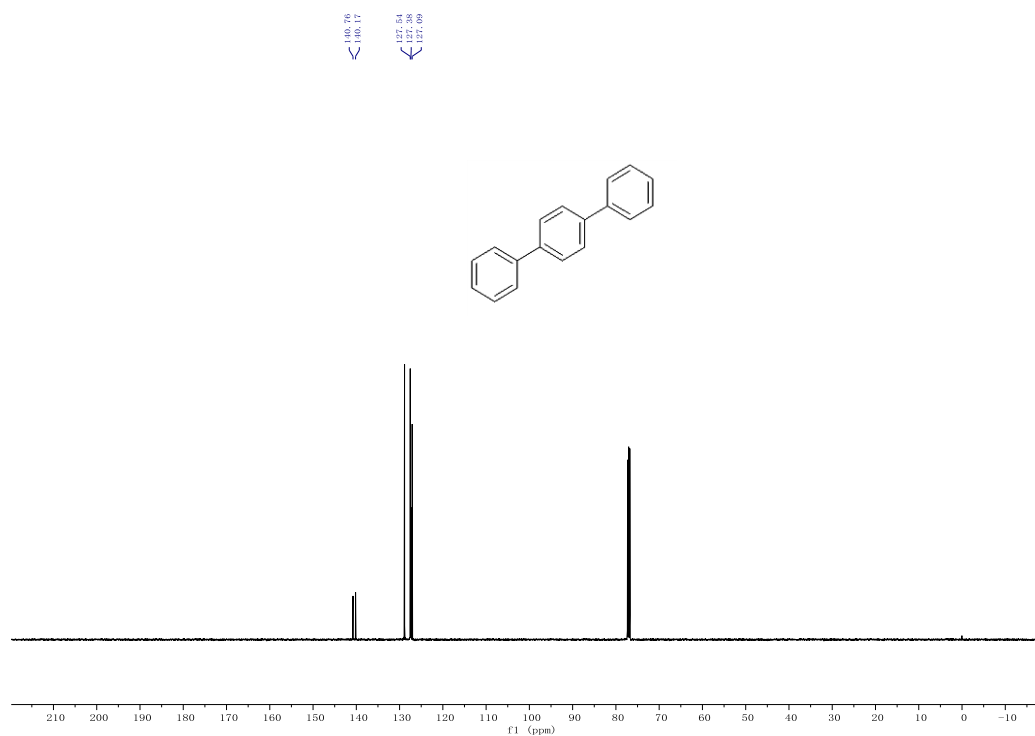

$^{13}\text{C}$  NMR (126 MHz, Chloroform-*d*)  $\delta$  140.76, 140.17, 128.85, 127.54, 127.38, 127.09.

(Table 2, entry 6)

<sup>1</sup>H NMR spectrum of 4-Chlorobiphenyl

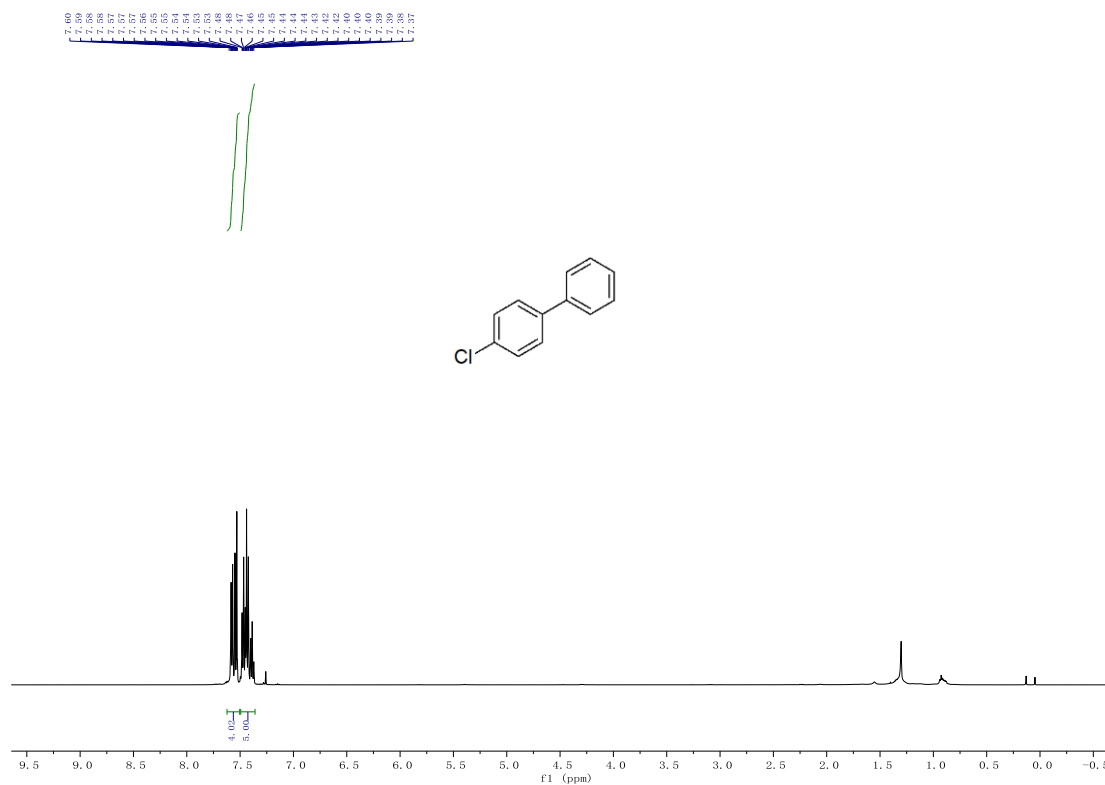

<sup>1</sup>H NMR (500 MHz, Chloroform-*d*) δ 7.61 – 7.50 (m, 4H), 7.49 – 7.36 (m, 5H).

<sup>13</sup>C NMR spectrum of 4-Chlorobiphenyl

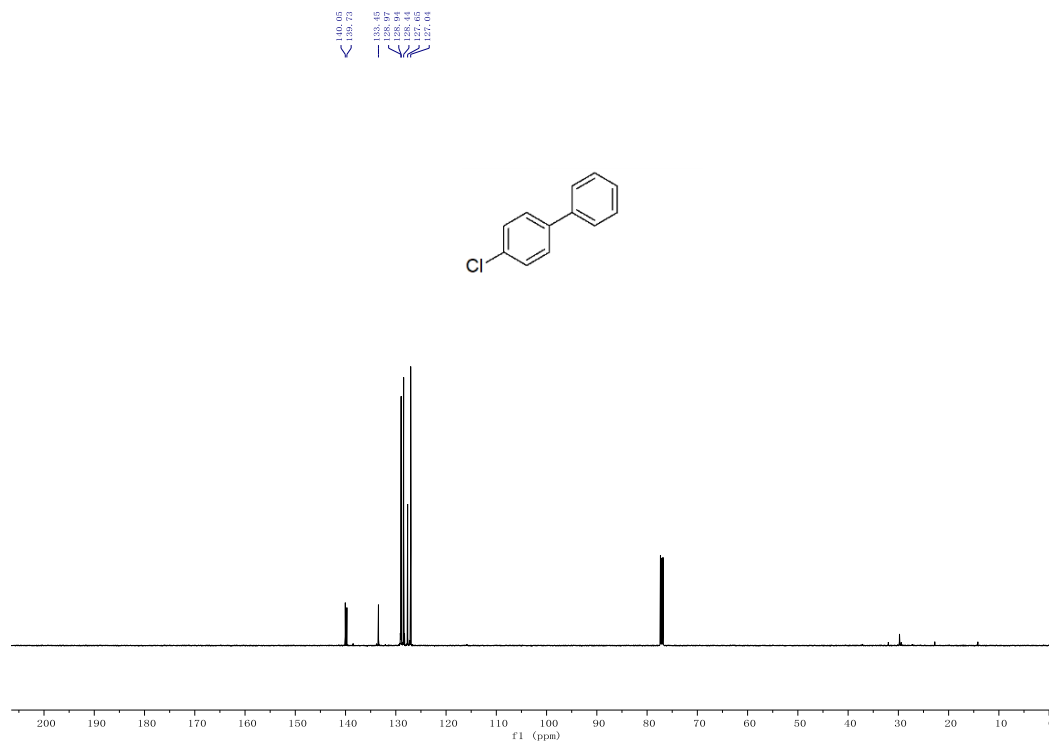

<sup>13</sup>C NMR (126 MHz, Chloroform-*d*) δ 140.1, 139.7, 133.4, 128.9, 128.9, 128.4, 127.6, 127.1.

(Table 3, entry 1)

### $^1\text{H}$ NMR spectrum of Biphenyl

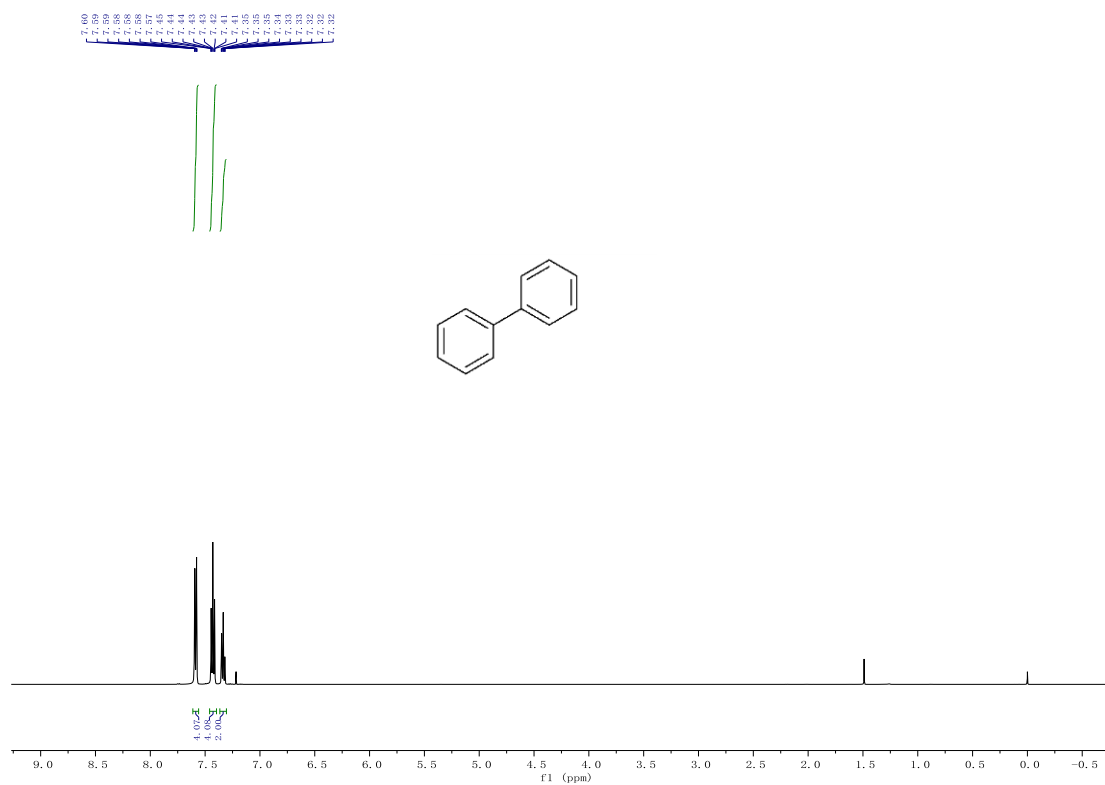

$^1\text{H}$  NMR (500 MHz, Chloroform-*d*)  $\delta$  7.61 – 7.56 (m, 4H), 7.43 (dd,  $J$  = 8.5, 6.9 Hz, 4H), 7.37 – 7.31 (m, 2H).

### $^{13}\text{C}$ NMR spectrum of Biphenyl

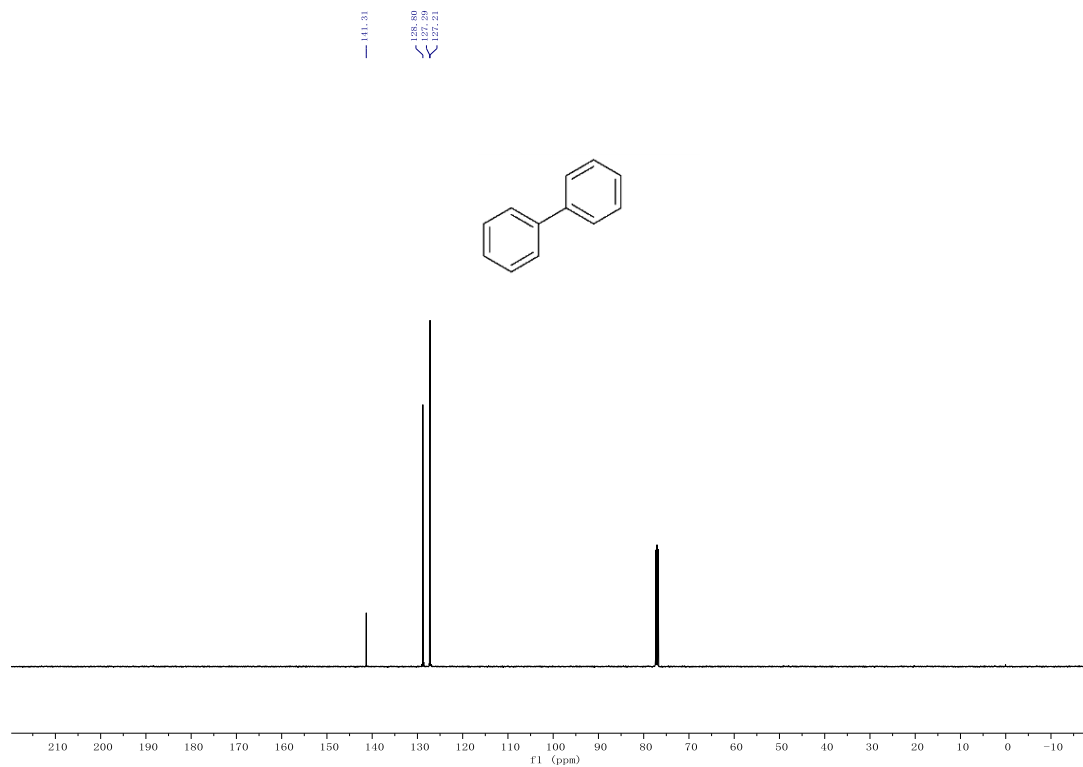

$^{13}\text{C}$  NMR (126 MHz, Chloroform-*d*)  $\delta$  141.3, 128.8, 127.3, 127.2.

(Table 3, entry 2)

<sup>1</sup>H NMR spectrum of 4-Methylbiphenyl

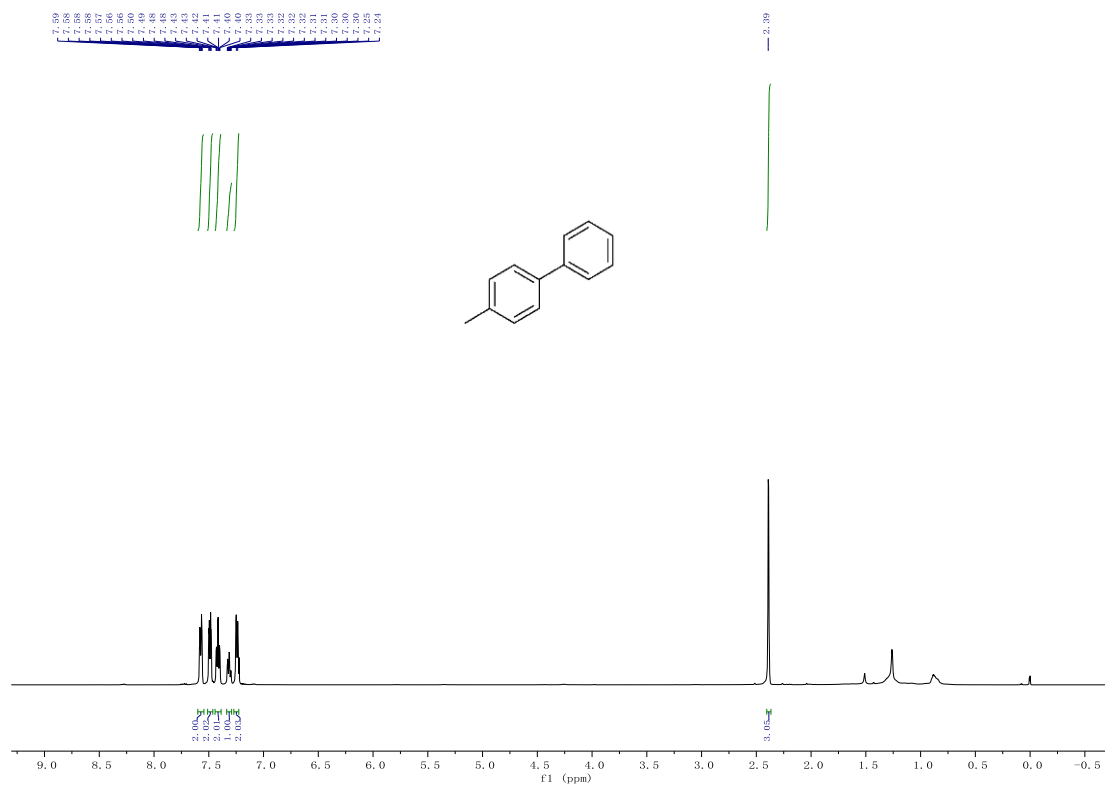

<sup>1</sup>H NMR (500 MHz, Chloroform-*d*)  $\delta$  7.60 – 7.54 (m, 2H), 7.49 (dd,  $J$  = 8.1, 2.3 Hz, 2H), 7.43 – 7.40 (m, 2H), 7.34 – 7.29 (m, 1H), 7.24 (d,  $J$  = 6.0 Hz, 2H), 2.39 (s, 3H).

<sup>13</sup>C NMR spectrum of 4-Methylbiphenyl

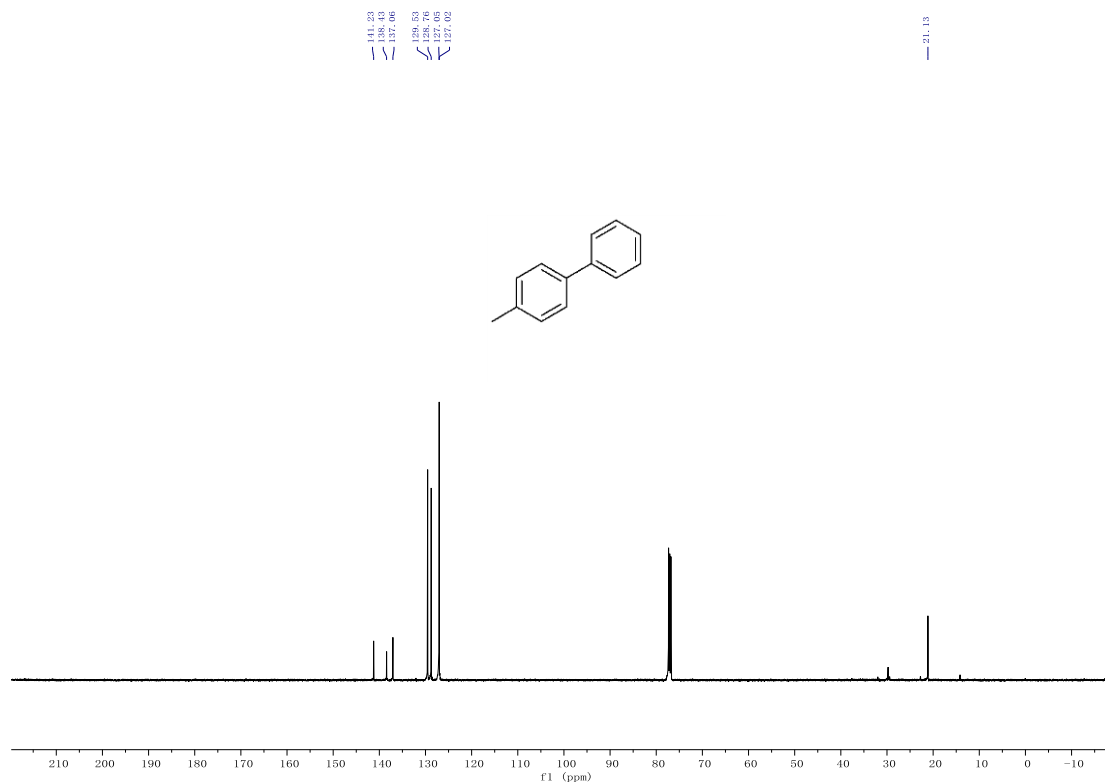

<sup>13</sup>C NMR (126 MHz, Chloroform-*d*)  $\delta$  141.2, 138.4, 137.1, 129.5, 128.7, 127.0, 127.0, 21.1.

(Table 3, entry 3)

### <sup>1</sup>H NMR spectrum of 4-Methoxybiphenyl

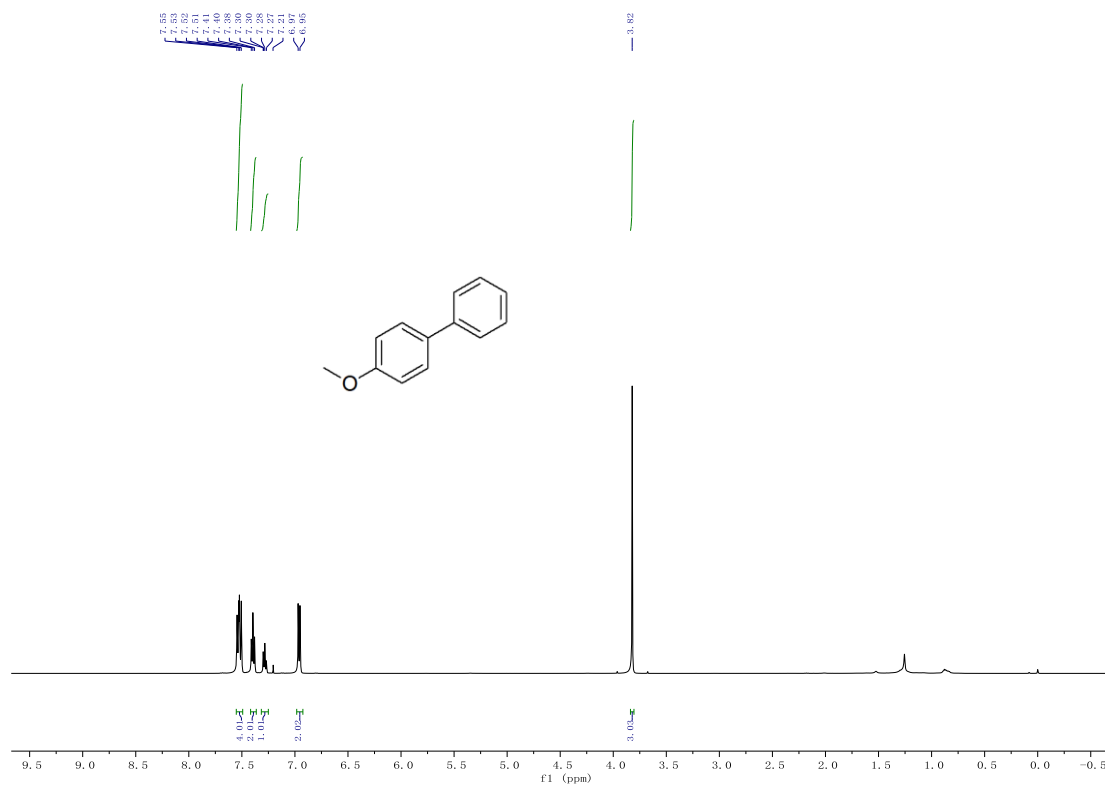

<sup>1</sup>H NMR (500 MHz, Chloroform-*d*)  $\delta$  7.55 – 7.51 (m, 4H), 7.40 (t,  $J = 7.7$  Hz, 2H), 7.32 – 7.25 (m, 1H), 6.96 (d,  $J = 8.6$  Hz, 2H), 3.82 (s, 3H).

### <sup>13</sup>C NMR spectrum of 4-Methoxybiphenyl

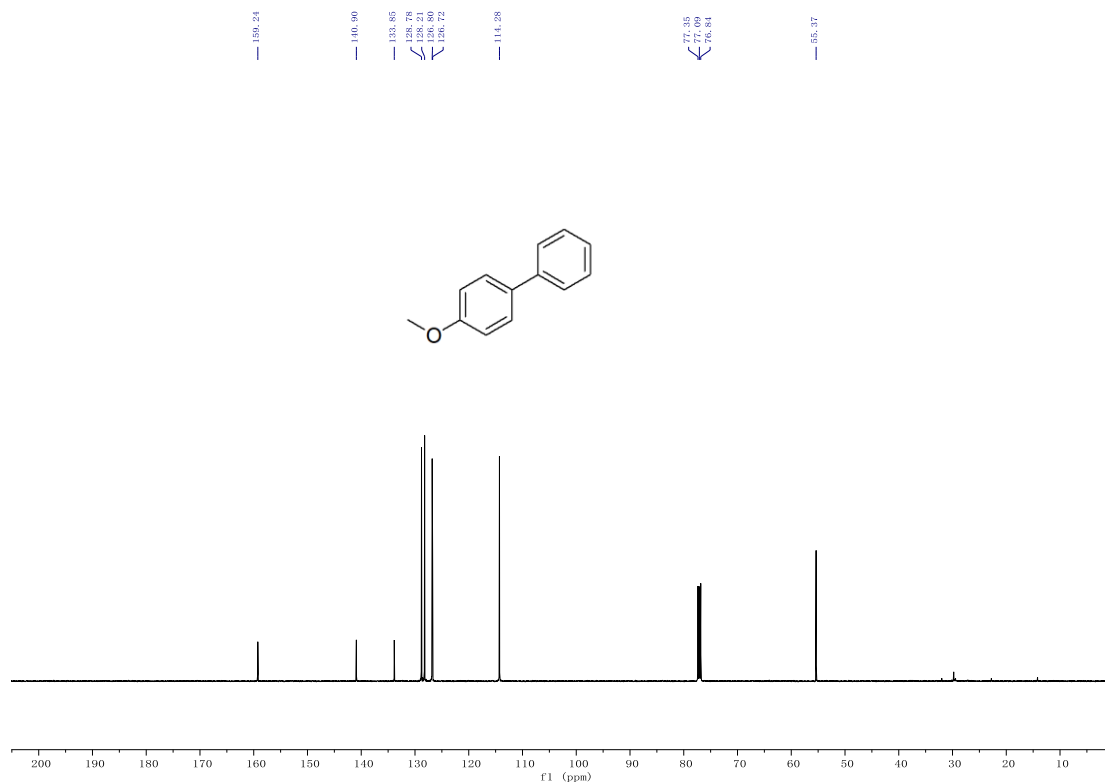

<sup>13</sup>C NMR (126 MHz, Chloroform-*d*)  $\delta$  159.2, 140.9, 133.9, 128.8, 128.2, 126.8, 126.7, 114.3, 55.4.



(Table 3, entry 4)

<sup>1</sup>H NMR spectrum of 4-tert-Butylbiphenyl

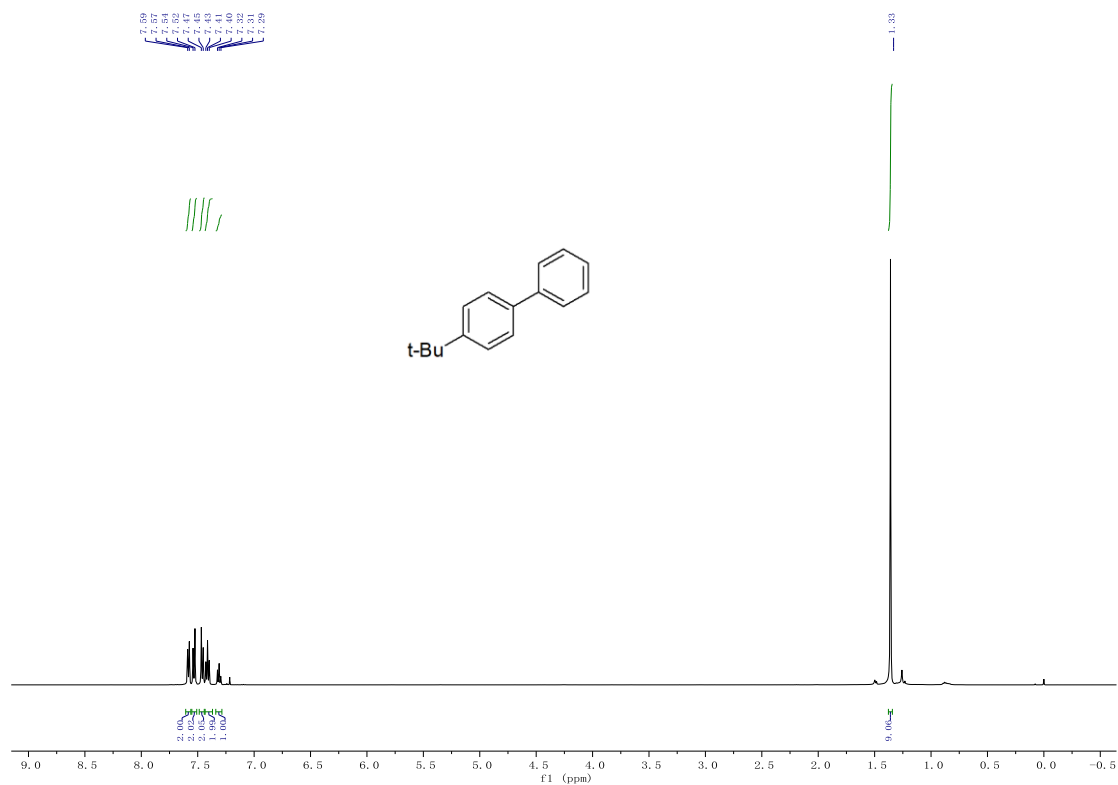

<sup>1</sup>H NMR (500 MHz, Chloroform-*d*)  $\delta$  7.58 (d,  $J$  = 7.3 Hz, 2H), 7.53 (d,  $J$  = 8.4 Hz, 2H), 7.46 (d,  $J$  = 8.4 Hz, 2H), 7.41 (t,  $J$  = 7.6 Hz, 2H), 7.31 (t,  $J$  = 7.7 Hz, 1H), 1.36 (s, 9H).

<sup>13</sup>C NMR spectrum of 2 4-tert-Butylbiphenyl

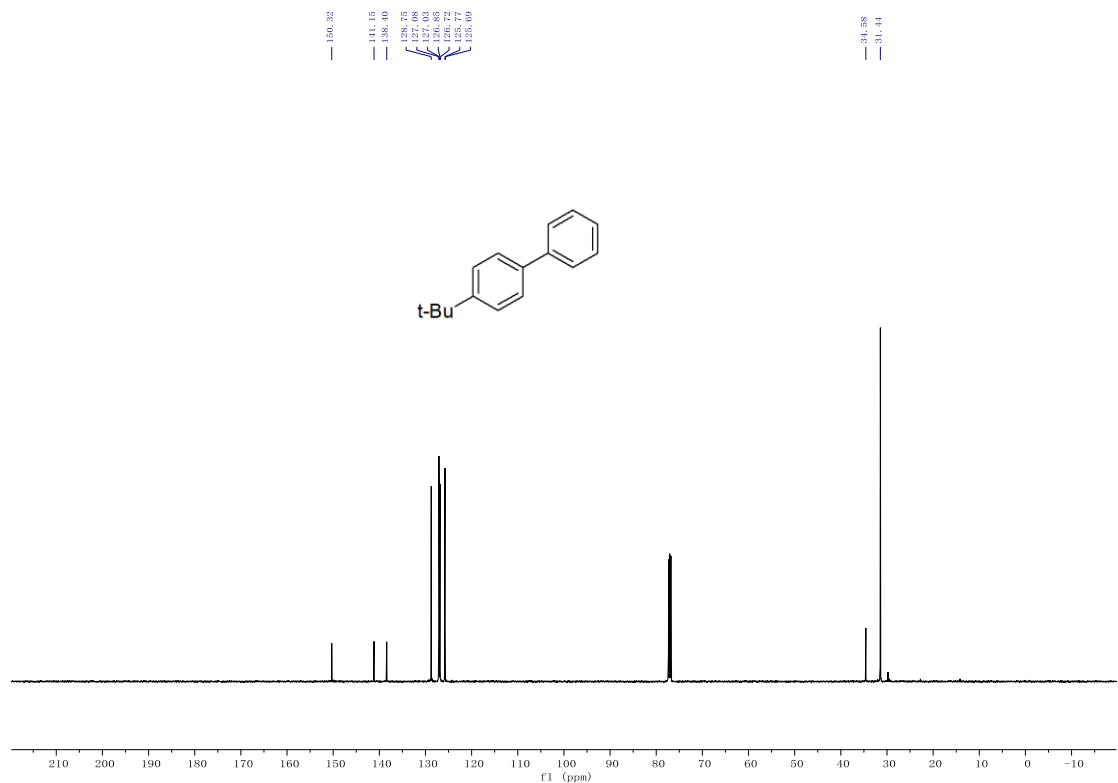

<sup>13</sup>C NMR (126 MHz, Chloroform-*d*)  $\delta$  150.3, 141.2, 138.4, 128.8, 127.1, 127.1, 126.9, 125.8, 34.6, 31.4.

(Table 3, entry 5)

<sup>1</sup>H NMR spectrum of 4-Nitrobiphenyl

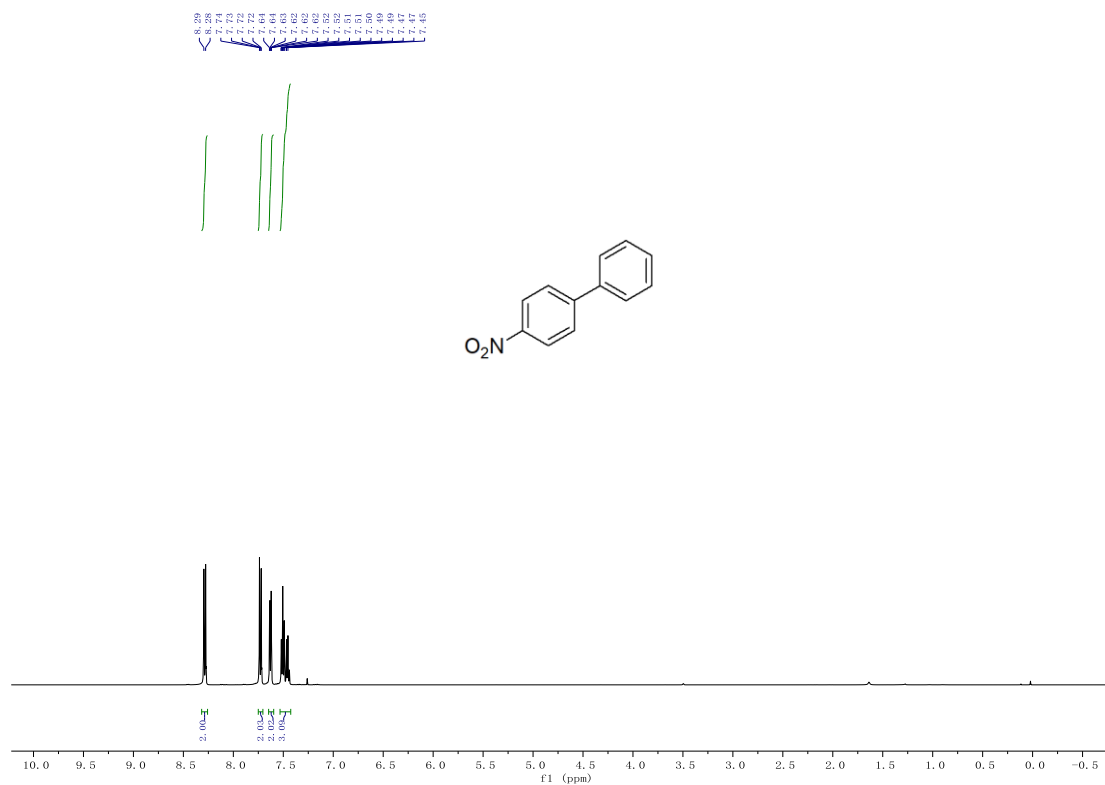

<sup>1</sup>H NMR (500 MHz, Chloroform-*d*)  $\delta$  8.29 (d,  $J = 8.8$  Hz, 2H), 7.75 – 7.70 (m, 2H), 7.65 – 7.60 (m, 2H), 7.53 – 7.42 (m, 3H).

<sup>13</sup>C NMR spectrum of 4-Nitrobiphenyl

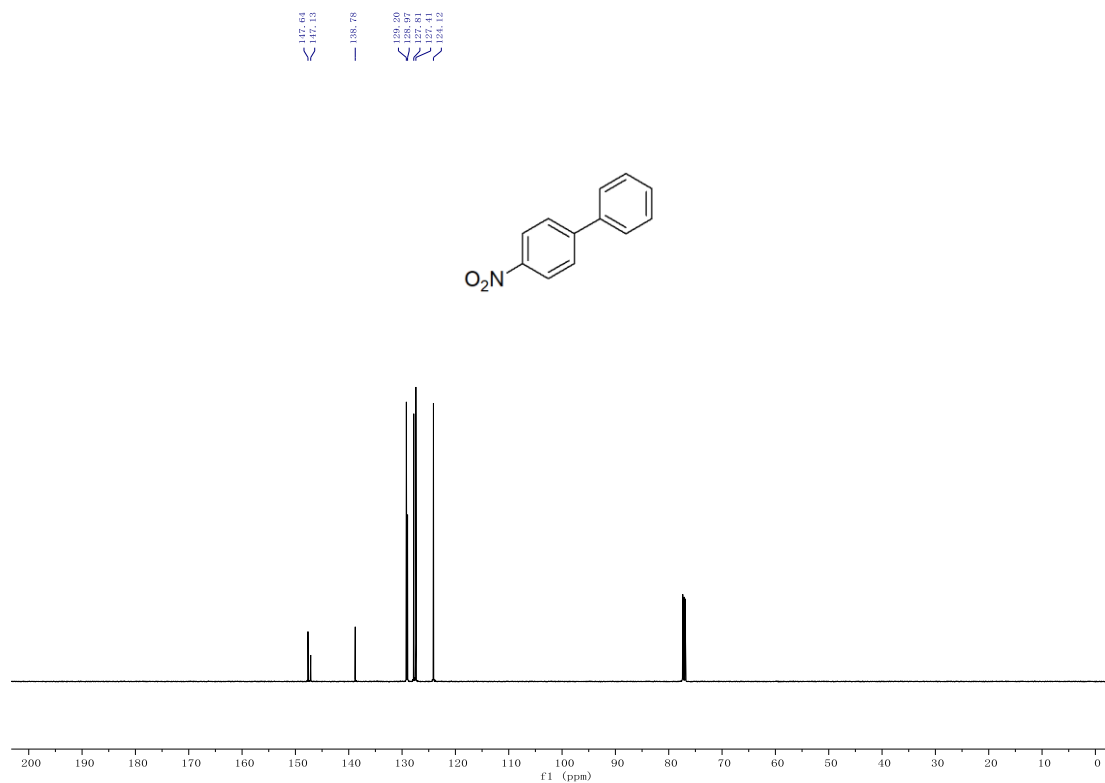

<sup>13</sup>C NMR (126 MHz, Chloroform-*d*)  $\delta$  147.6, 147.1, 138.7, 129.2, 128.9, 127.8, 127.4, 124.1.

(Table 3, entry 6)

<sup>1</sup>H NMR spectrum of 4-Cyanobiphenyl

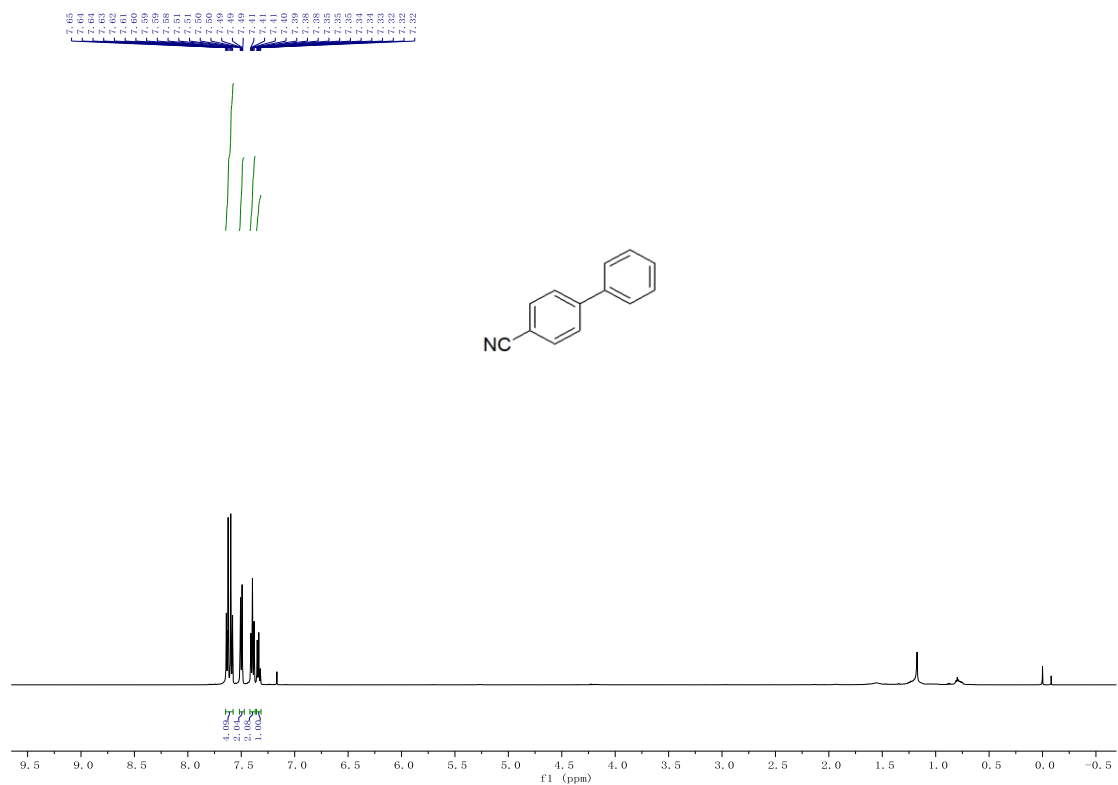

<sup>1</sup>H NMR (500 MHz, Chloroform-*d*)  $\delta$  7.65 – 7.58 (m, 4H), 7.52 – 7.47 (m, 2H), 7.42 – 7.37 (m, 2H), 7.36 – 7.32 (m, 1H).

<sup>13</sup>C NMR spectrum of 4-Cyanobiphenyl

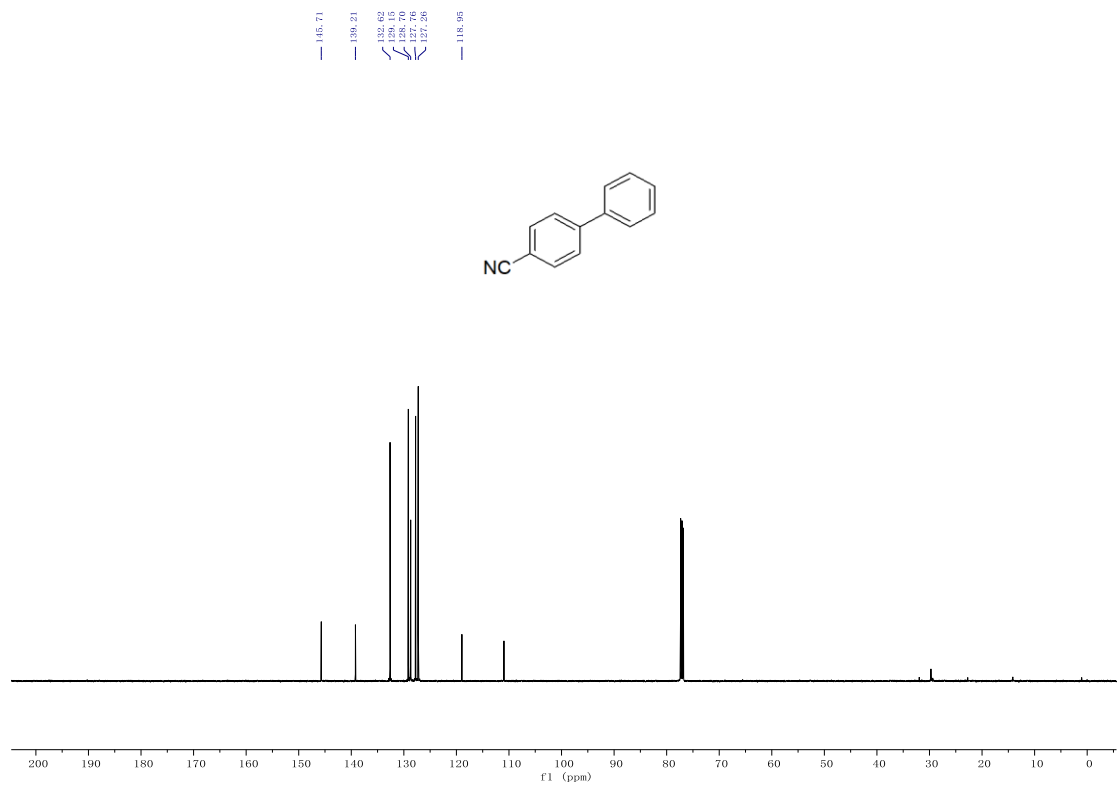

<sup>13</sup>C NMR (126 MHz, Chloroform-*d*)  $\delta$  145.7, 139.2, 132.6, 129.1, 128.7, 127.7, 127.2, 118.9, 110.9.

(Table 3, entry 7)

<sup>1</sup>H NMR spectrum of 4-(Trifluoromethyl)biphenyl

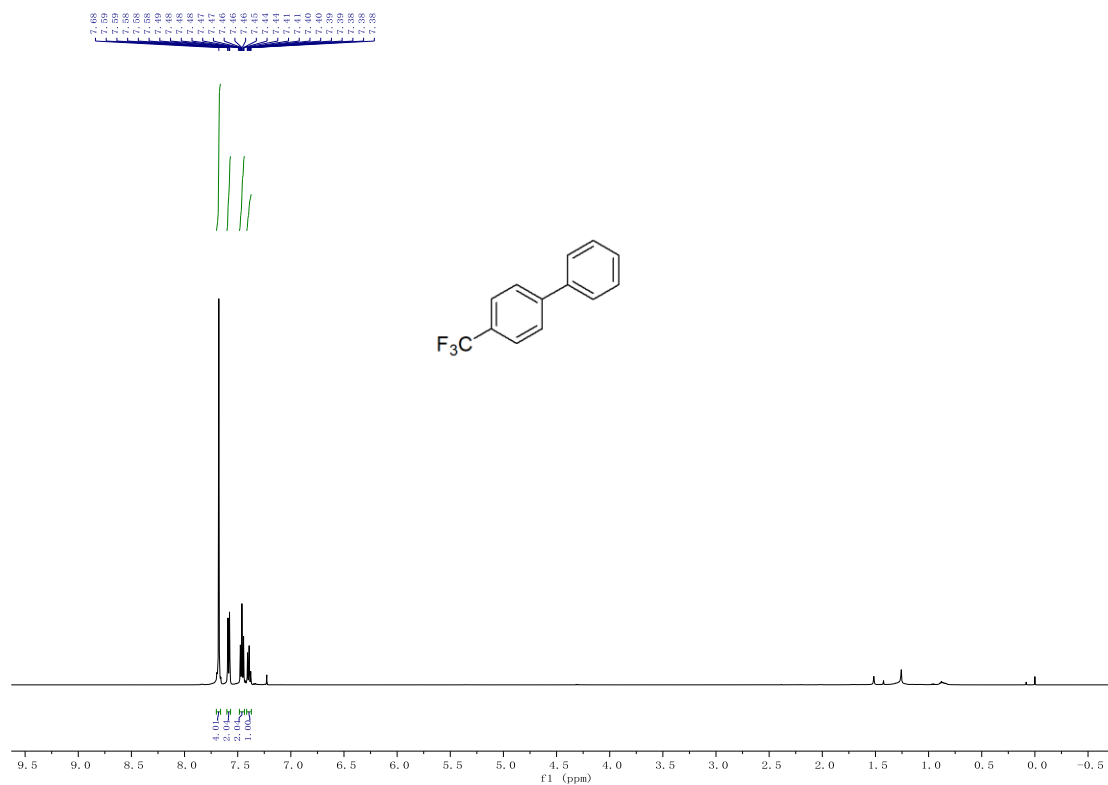

<sup>13</sup>C NMR spectrum of 4-(Trifluoromethyl)biphenyl

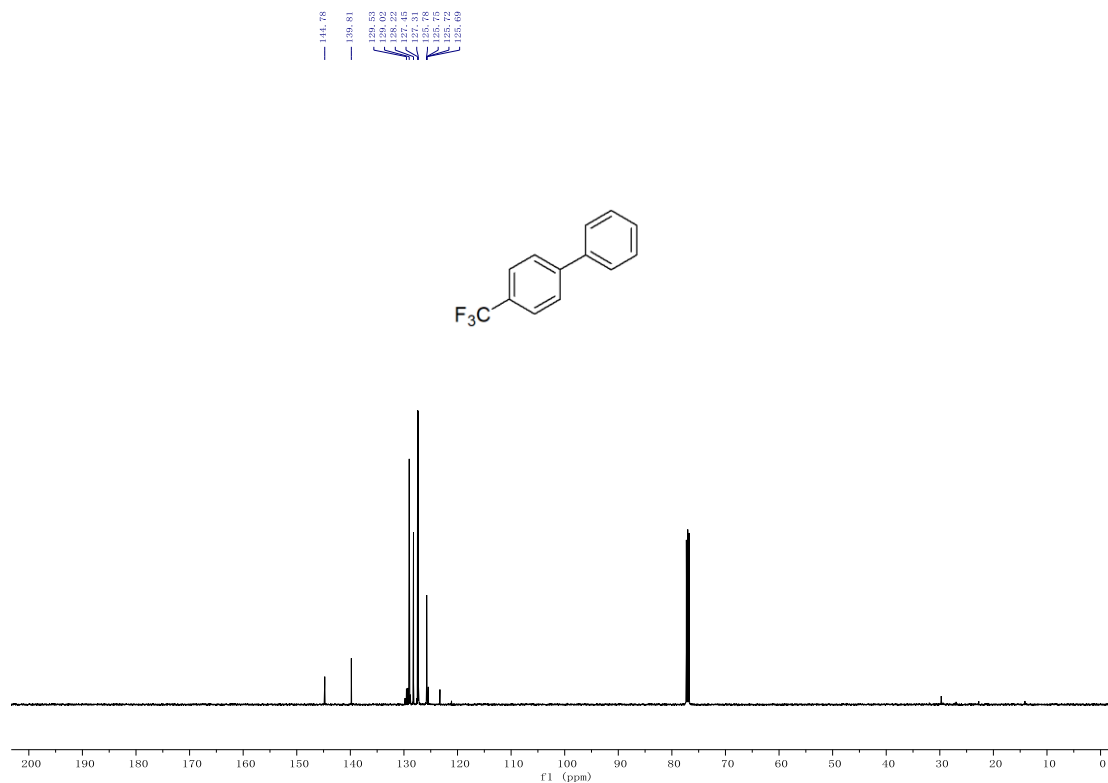

(Table 3, entry 8)

### $^1\text{H}$ NMR spectrum of 2-Phenyltoluene

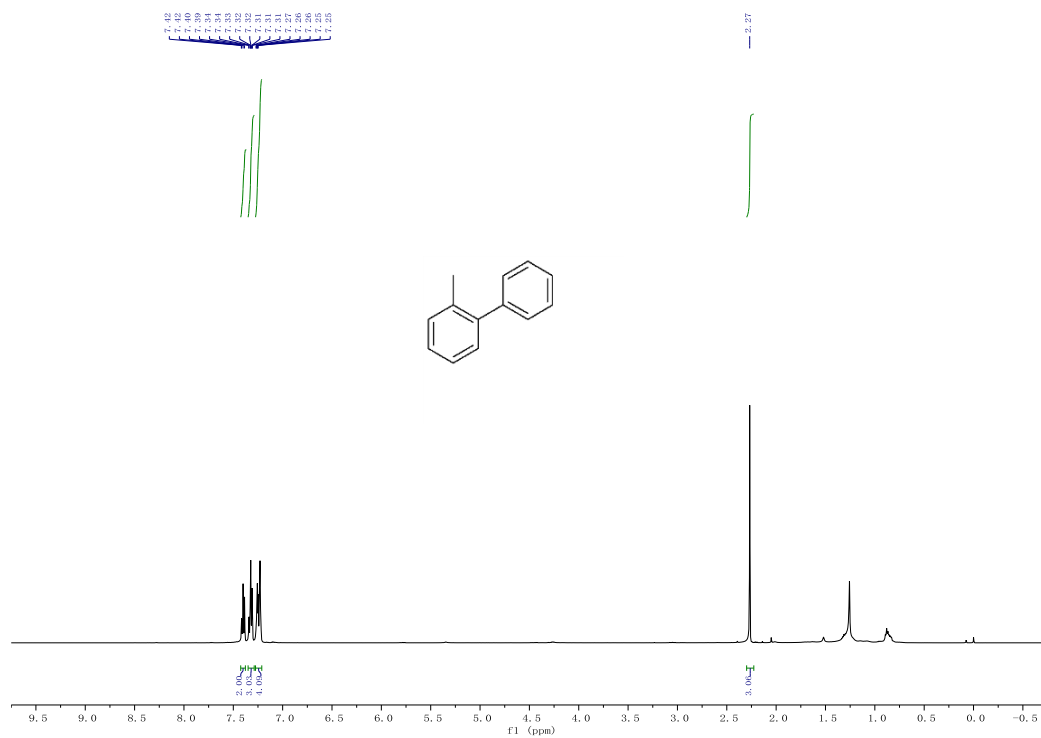

$^1\text{H}$  NMR (500 MHz, Chloroform-*d*)  $\delta$  7.40 (t,  $J = 7.4$  Hz, 2H), 7.35 – 7.29 (m, 3H), 7.27 – 7.21 (m, 4H), 2.27 (s, 3H).

### $^{13}\text{C}$ NMR spectrum of 2-Phenyltoluene

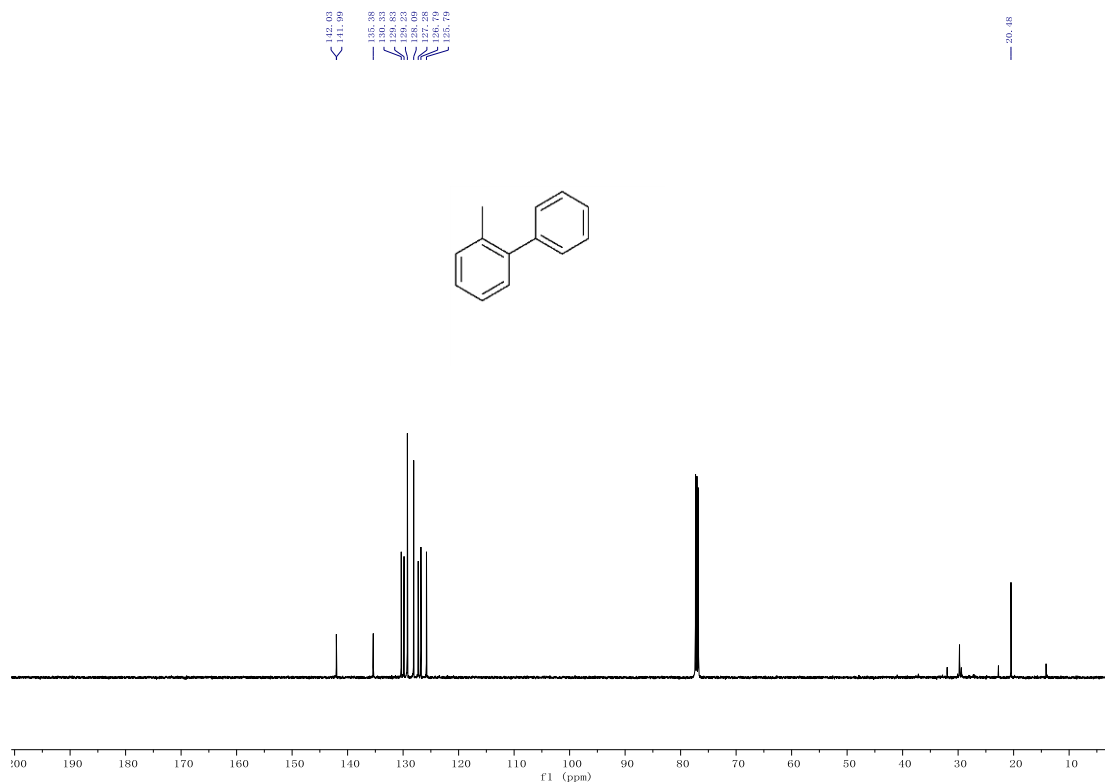

$^{13}\text{C}$  NMR (126 MHz, Chloroform-*d*)  $\delta$  142.0, 141.9, 135.3, 130.3, 129.8, 129.2, 128.1, 127.2, 126.7, 125.7, 20.4.

(Table 3, entry 9)

<sup>1</sup>H NMR spectrum of 2-Methoxybiphenyl

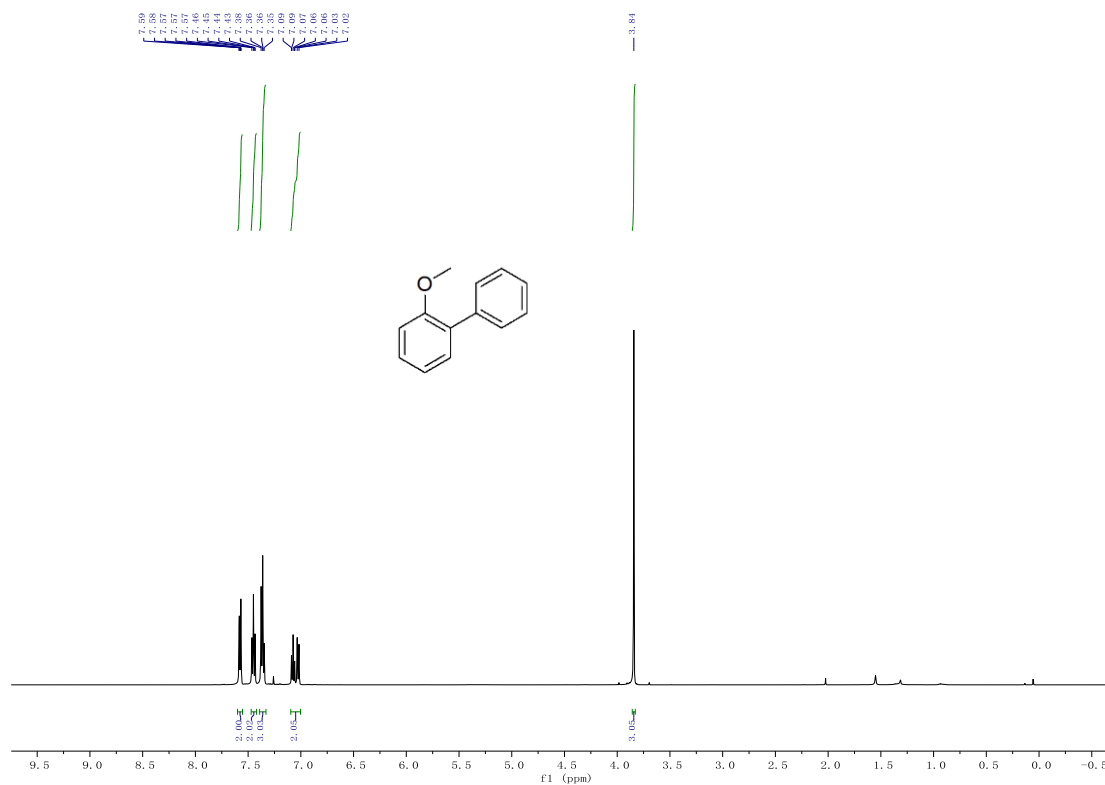

<sup>1</sup>H NMR (500 MHz, Chloroform-*d*)  $\delta$  7.60 – 7.55 (m, 2H), 7.45 (t,  $J = 7.7$  Hz, 2H), 7.36 (t,  $J = 7.2$  Hz, 3H), 7.10 – 7.00 (m, 2H), 3.84 (s, 3H).

<sup>13</sup>C NMR spectrum of 2-Methoxybiphenyl

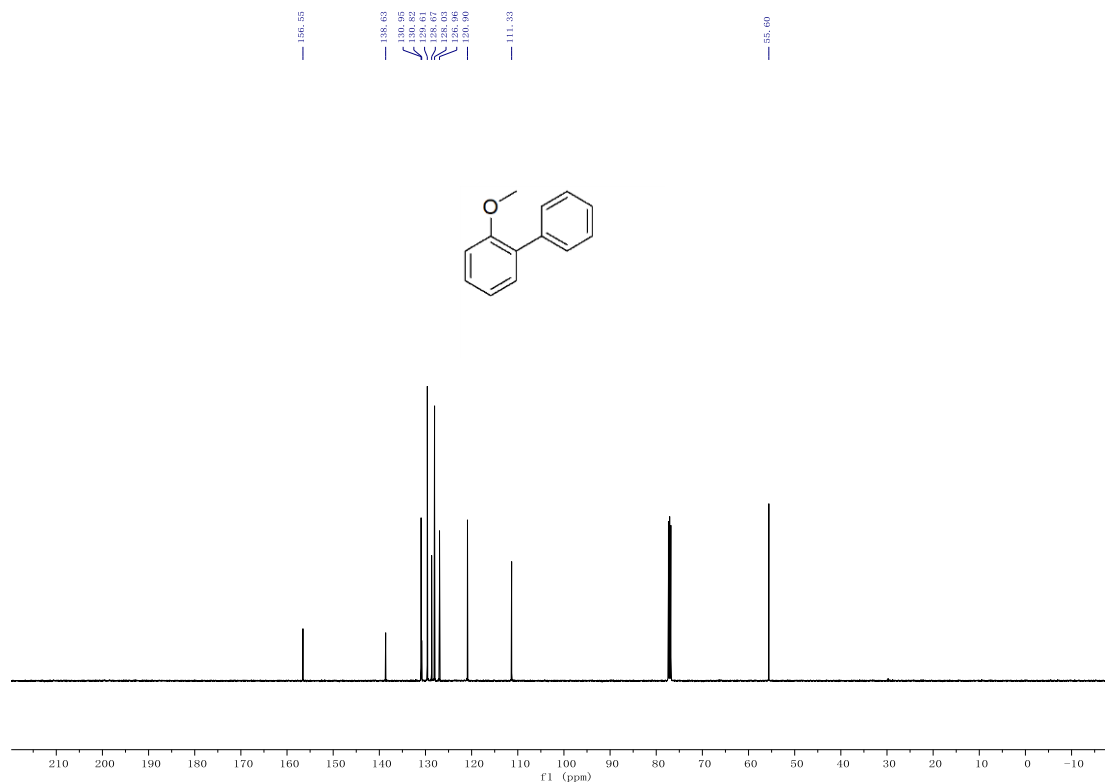

<sup>13</sup>C NMR (126 MHz, Chloroform-*d*)  $\delta$  156.5, 138.6, 130.9, 130.8, 129.6, 128.6, 128.1, 126.9, 120.9, 111.3, 55.6.

(Table 3, entry 10)

<sup>1</sup>H NMR spectrum of 2-Isopropylbiphenyl

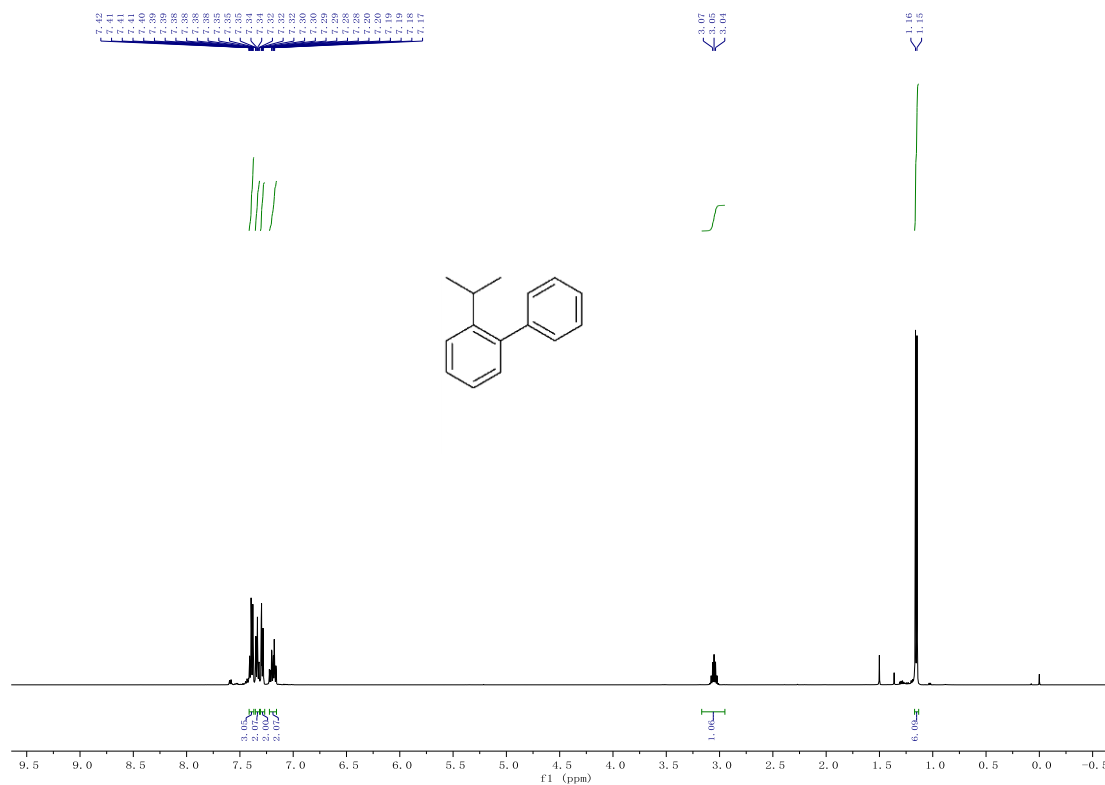

<sup>1</sup>H NMR (500 MHz, Chloroform-*d*)  $\delta$  7.41 – 7.37 (m, 3H), 7.36 – 7.32 (m, 2H), 7.31 – 7.27 (m, 2H), 7.22 – 7.16 (m, 2H), 3.17 – 2.95 (m, 1H), 1.15 (d,  $J = 6.9$  Hz, 6H).

<sup>13</sup>C NMR spectrum of 2-Isopropylbiphenyl

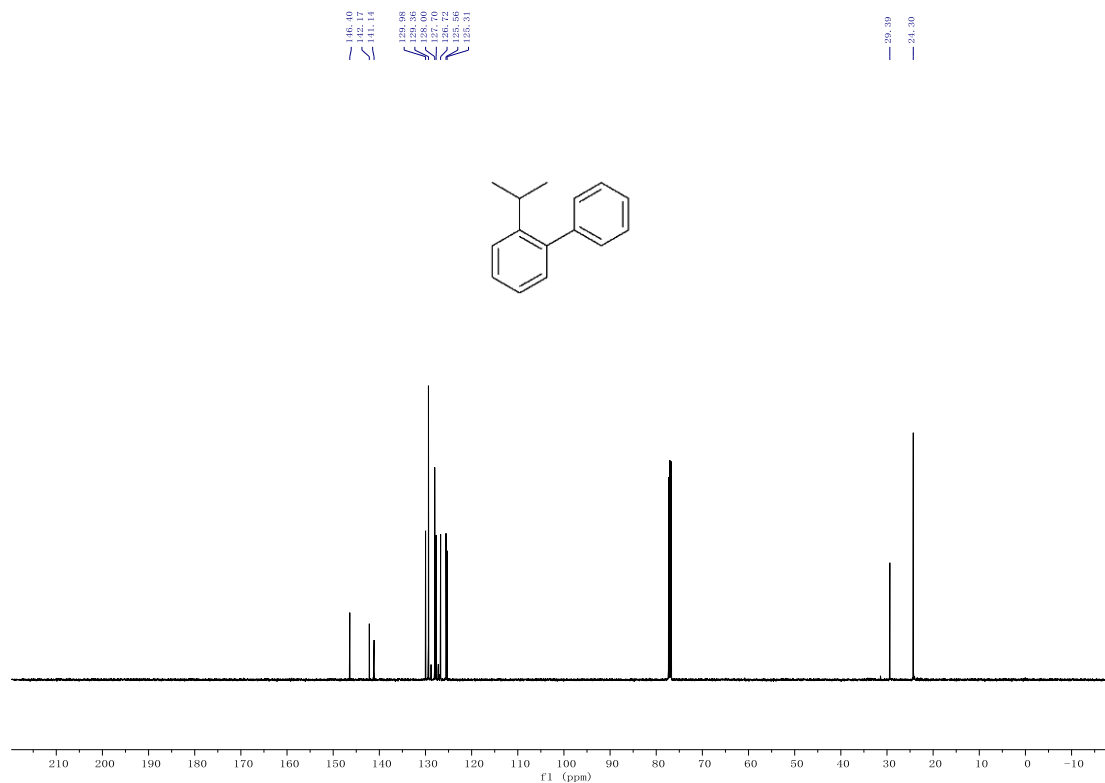

<sup>13</sup>C NMR (126 MHz, Chloroform-*d*)  $\delta$  146.4, 142.1, 141.1, 129.9, 129.3, 128.0, 127.7, 126.7, 125.5, 125.3, 29.3, 24.3.

(Table 3, entry 11)

<sup>1</sup>H NMR spectrum of 2-Nitrodiphenyl

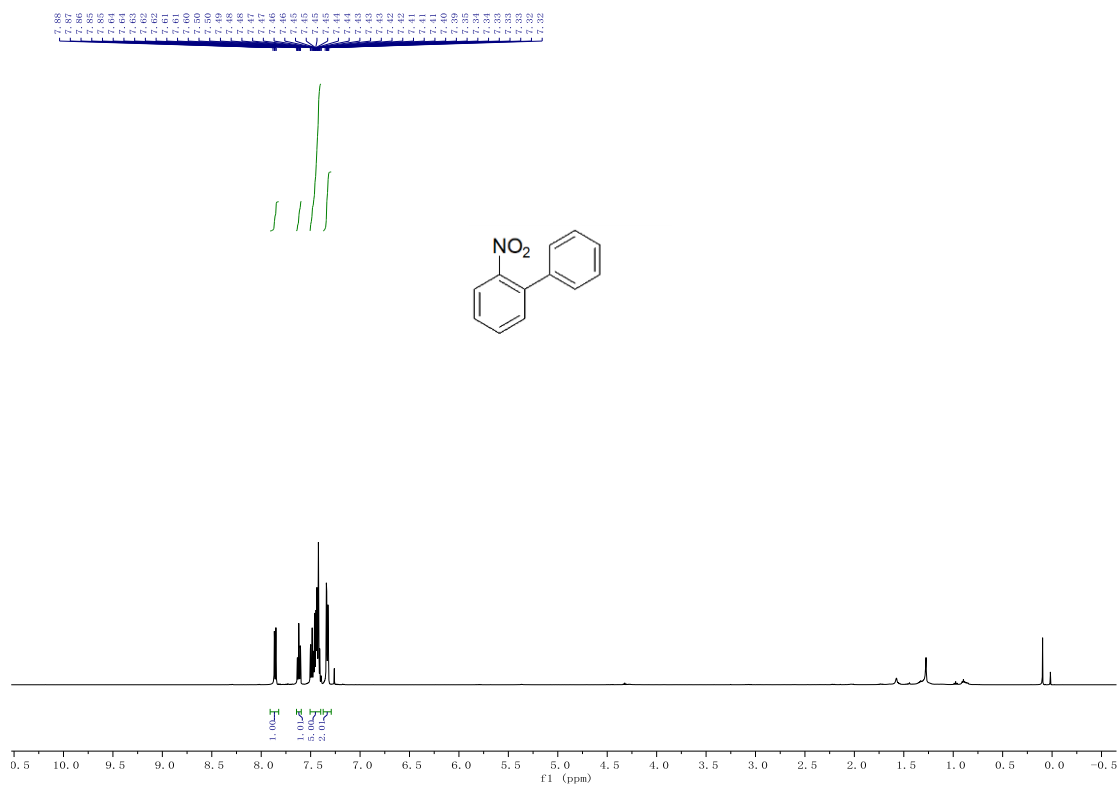

<sup>1</sup>H NMR (500 MHz, Chloroform-*d*)  $\delta$  7.86 (dd,  $J = 8.0, 1.3$  Hz, 1H), 7.64–7.60 (m, 1H), 7.51 – 7.40 (m, 5H), 7.37 – 7.29 (m, 2H).

<sup>13</sup>C NMR spectrum of 2-Nitrodiphenyl

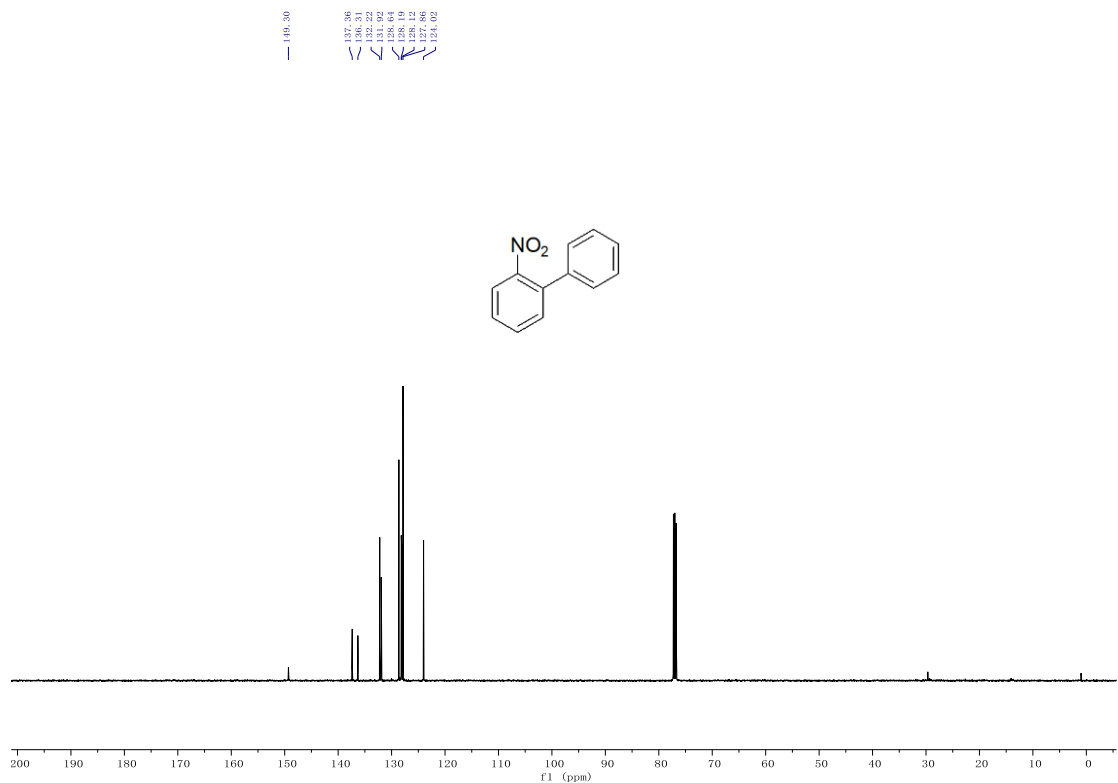

<sup>13</sup>C NMR (126 MHz, Chloroform-*d*)  $\delta$  149.3, 137.3, 136.3, 132.2, 131.9, 128.6, 128.1, 128.1, 127.8, 124.0.



(Table 3, entry 12)

<sup>1</sup>H NMR spectrum of 2-Cyanobiphenyl

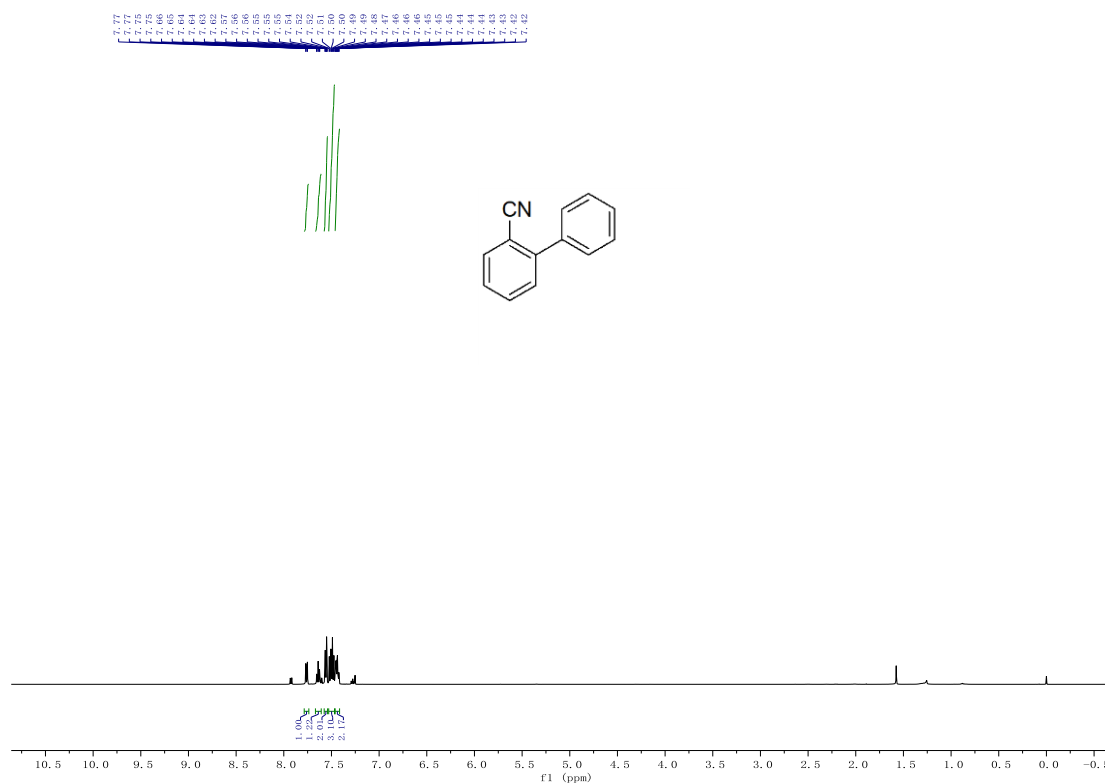

<sup>1</sup>H NMR (500 MHz, Chloroform-*d*)  $\delta$  7.76 (dd,  $J = 7.8, 1.4$  Hz, 1H), 7.66 – 7.62 (m, 1H), 7.58 – 7.54 (m, 2H), 7.53 – 7.47 (m, 3H), 7.46 – 7.42 (m, 2H).

<sup>13</sup>C NMR spectrum of 2-Cyanobiphenyl

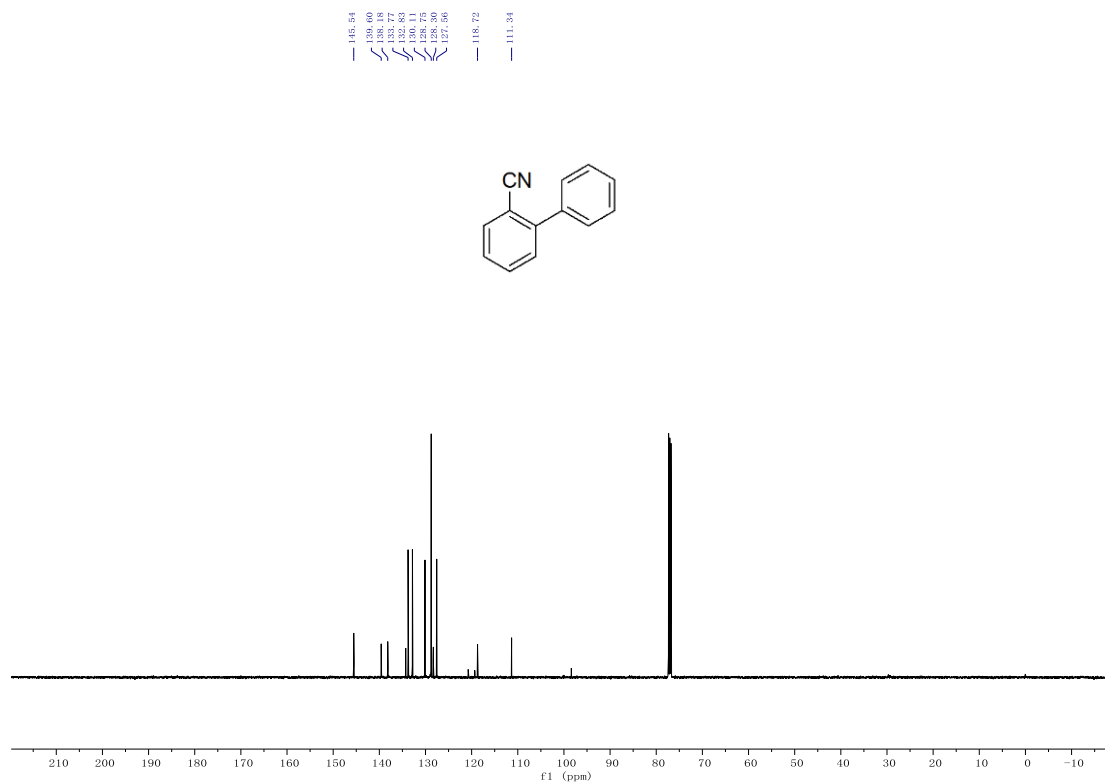

<sup>13</sup>C NMR (126 MHz, Chloroform-*d*)  $\delta$  145.5, 139.6, 138.1, 133.7, 132.8, 130.1, 128.7, 128.3, 127.5, 118.7, 111.3.

(Table 3, entry 13)

**<sup>1</sup>H NMR spectrum of 2-(Trifluoromethyl)biphenyl**

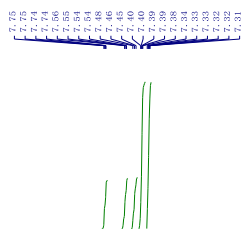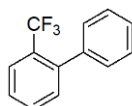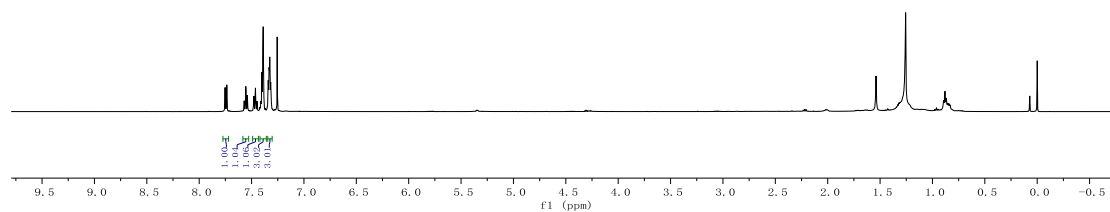

<sup>1</sup>H NMR (500 MHz, Chloroform-d)  $\delta$  7.74 (dd,  $J = 7.9, 1.3$  Hz, 1H), 7.56 – 7.54 (m, 1H), 7.48 – 7.45 (m, 1H), 7.40 – 7.38 (m, 3H), 7.34 – 7.31 (m, 3H).

**<sup>13</sup>C NMR spectrum of 2-(Trifluoromethyl)biphenyl**

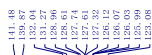

29.71

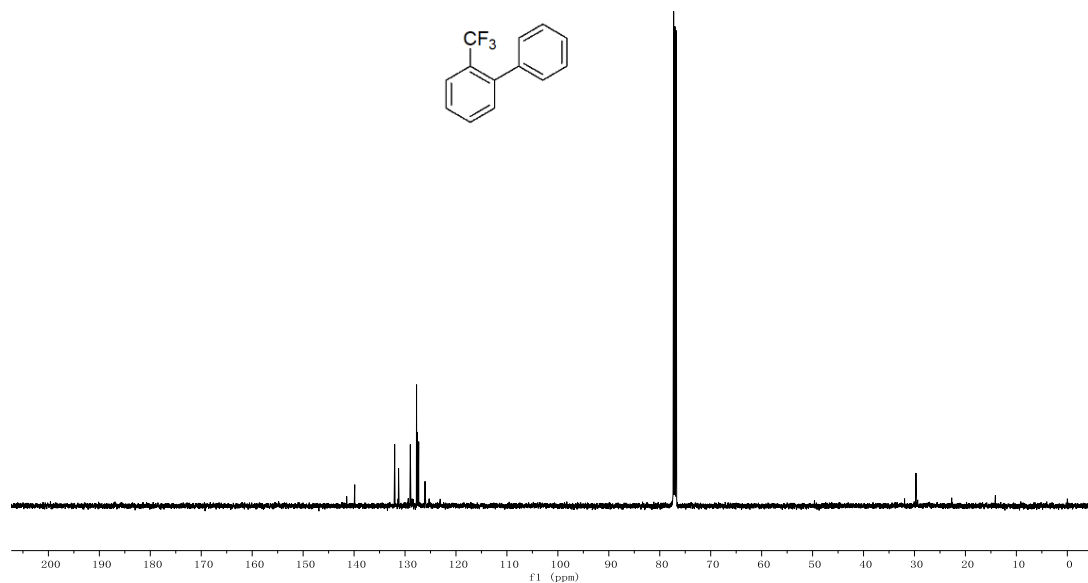

<sup>13</sup>C NMR (126 MHz, Chloroform-d)  $\delta$  141.4, 139.8, 132.0, 131.2, 128.9, 128.6, 127.7, 127.6, 127.3, 126.1 (q,  $J = 5.3$  Hz), 123.1.

(Table 3, entry 14)

<sup>1</sup>H NMR spectrum of 3,5-dimethyl-1,1'-biphenyl

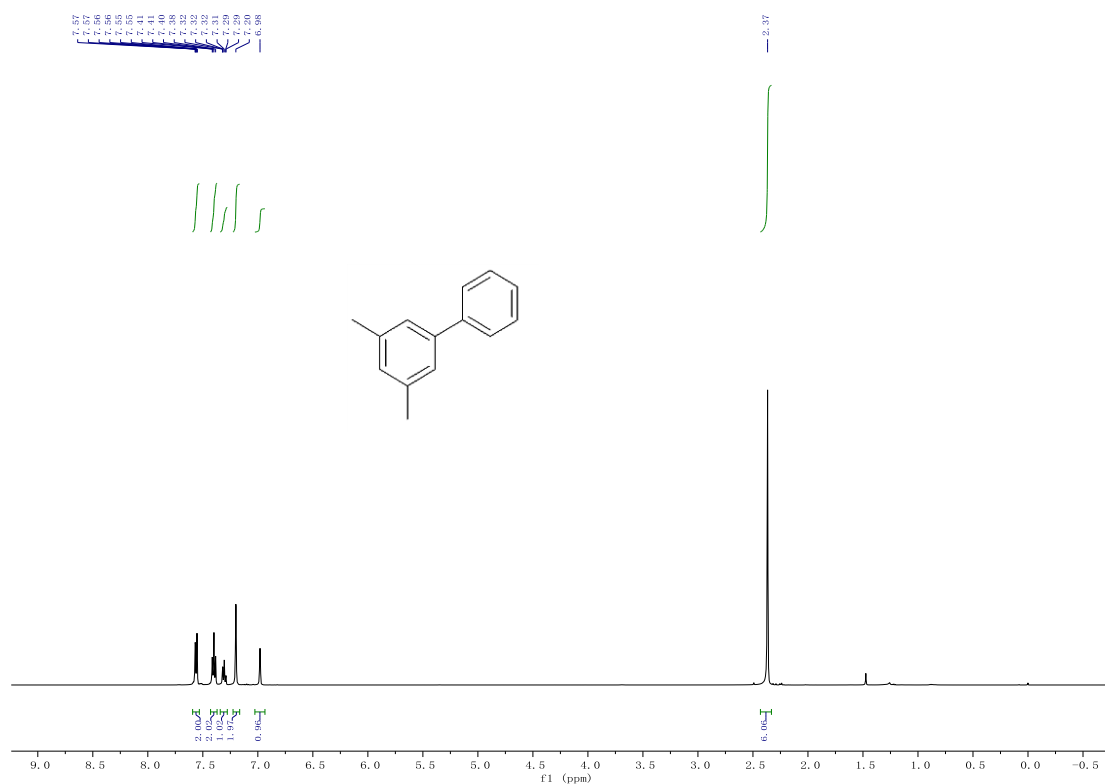

<sup>1</sup>H NMR (500 MHz, Chloroform-*d*)  $\delta$  7.59 – 7.53 (m, 2H), 7.40 (t,  $J = 7.6$  Hz, 2H), 7.34 – 7.28 (m, 1H), 7.20 (s, 2H), 6.98 (s, 1H), 2.37 (s, 6H).

<sup>13</sup>C NMR spectrum of 3,5-dimethyl-1,1'-biphenyl

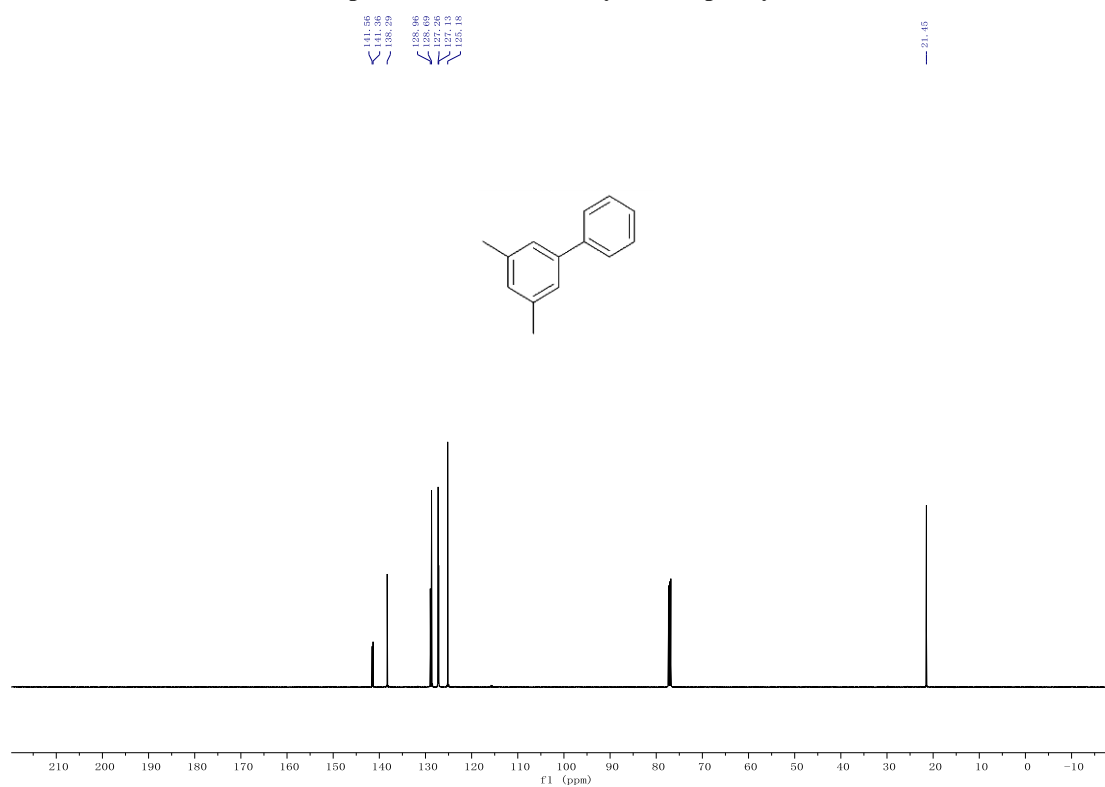

<sup>13</sup>C NMR (126 MHz, Chloroform-*d*)  $\delta$  141.6, 141.4, 138.3, 128.9, 128.7, 127.3, 127.1, 125.2, 21.5.

(Table 3, entry 15)

<sup>1</sup>H NMR spectrum of 2,4-Difluorobiphenyl

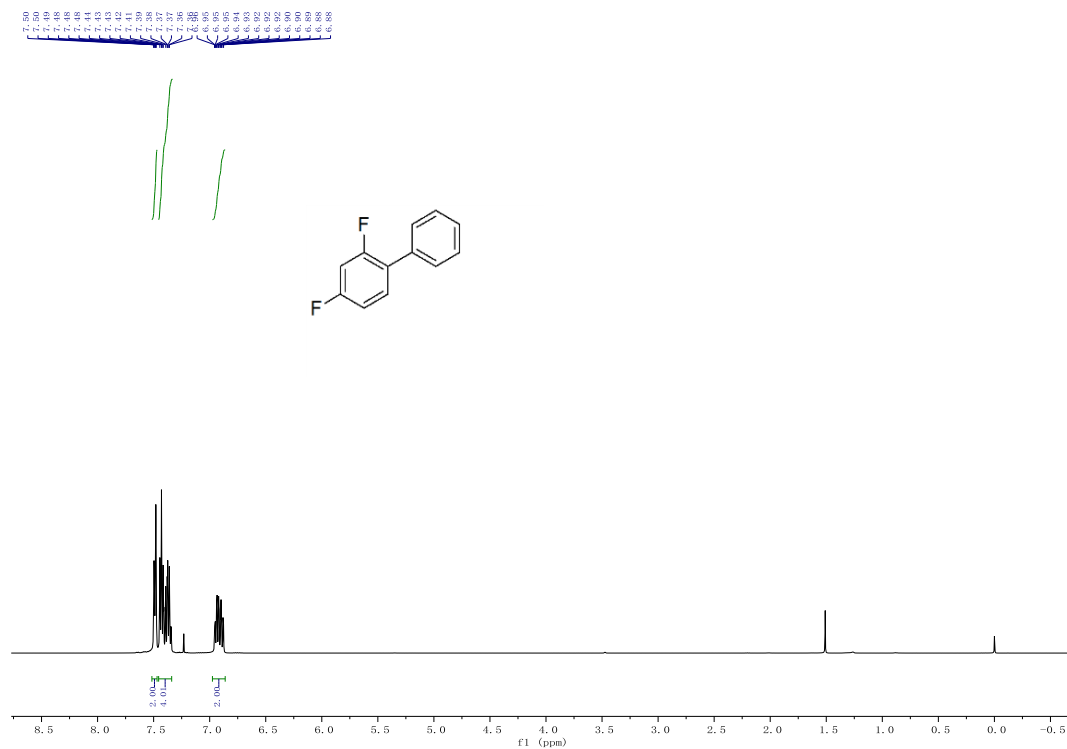

<sup>1</sup>H NMR (500 MHz, Chloroform-*d*) δ 7.50–7.48 (m, 2H), 7.46 – 7.34 (m, 4H), 6.98 – 6.86 (m, 2H).

<sup>13</sup>C NMR spectrum of 2,4-Difluorobiphenyl

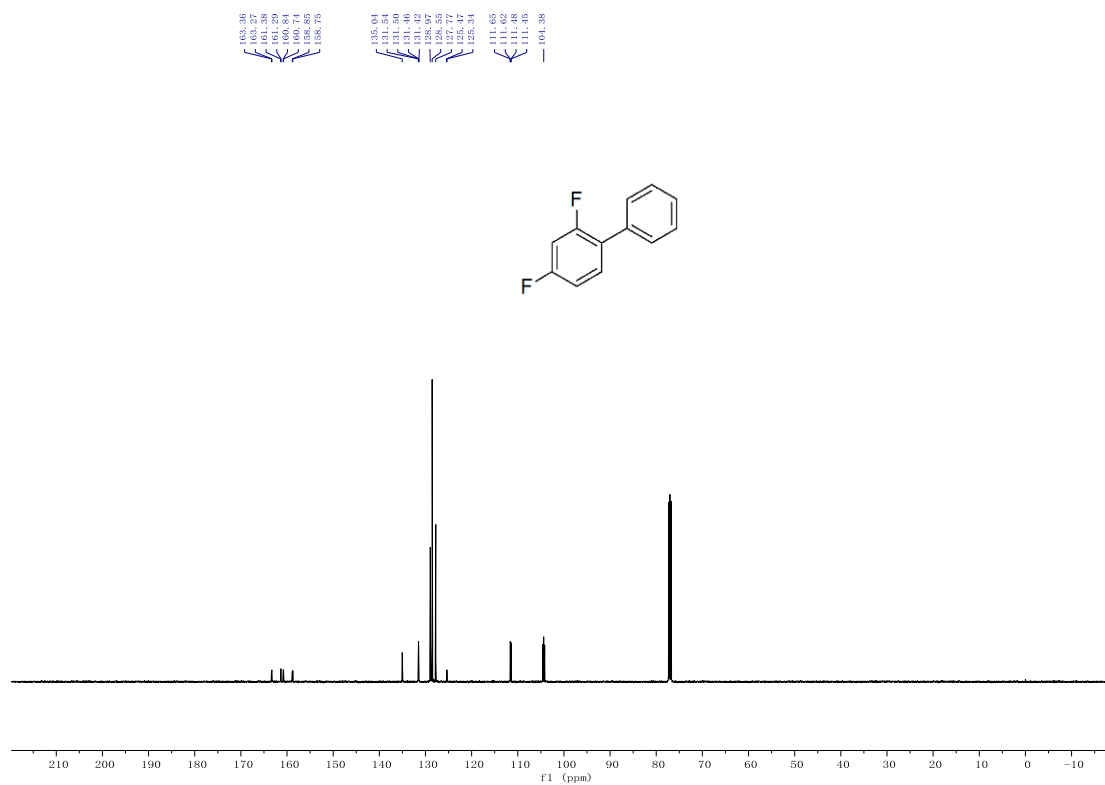

<sup>13</sup>C NMR (126 MHz, Chloroform-*d*) δ 162.3 (dd, *J* = 248.9, 11.9 Hz), 159.8 (dd, *J* = 250.2, 11.8 Hz), 135.0, 131.5 (dd, *J* = 9.3, 4.8 Hz), 128.9, 128.6, 127.7, 125.4 (d, *J* = 17.5 Hz), 111.6 (dd, *J* = 21.1, 3.7 Hz), 104.4.

(Table 3, entry 16)

<sup>1</sup>H NMR spectrum of 2,4,6-Trimethyl-1,1'-biphenyl

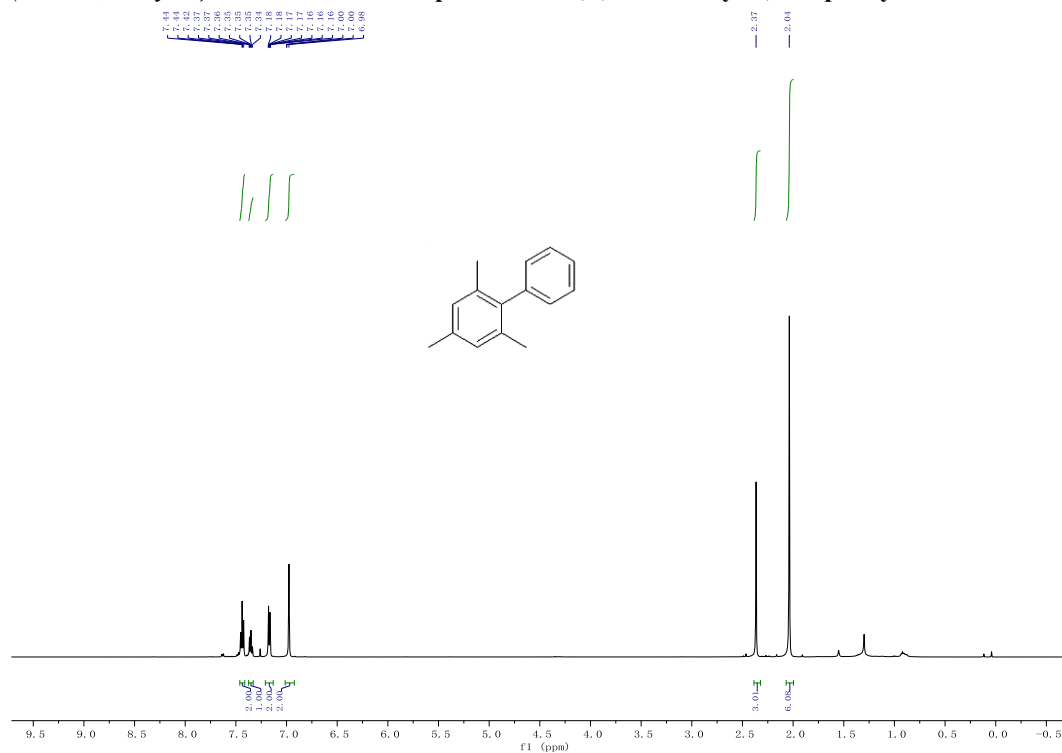

<sup>1</sup>H NMR (500 MHz, Chloroform-*d*) δ 7.43 (d,  $J = 7.6$  Hz, 2H), 7.37 – 7.33 (m, 1H), 7.21 – 7.13 (m, 2H), 6.98 (s, 2H), 2.37 (s, 3H), 2.04 (s, 6H).

<sup>13</sup>C NMR spectrum of 2,4,6-Trimethyl-1,1'-biphenyl

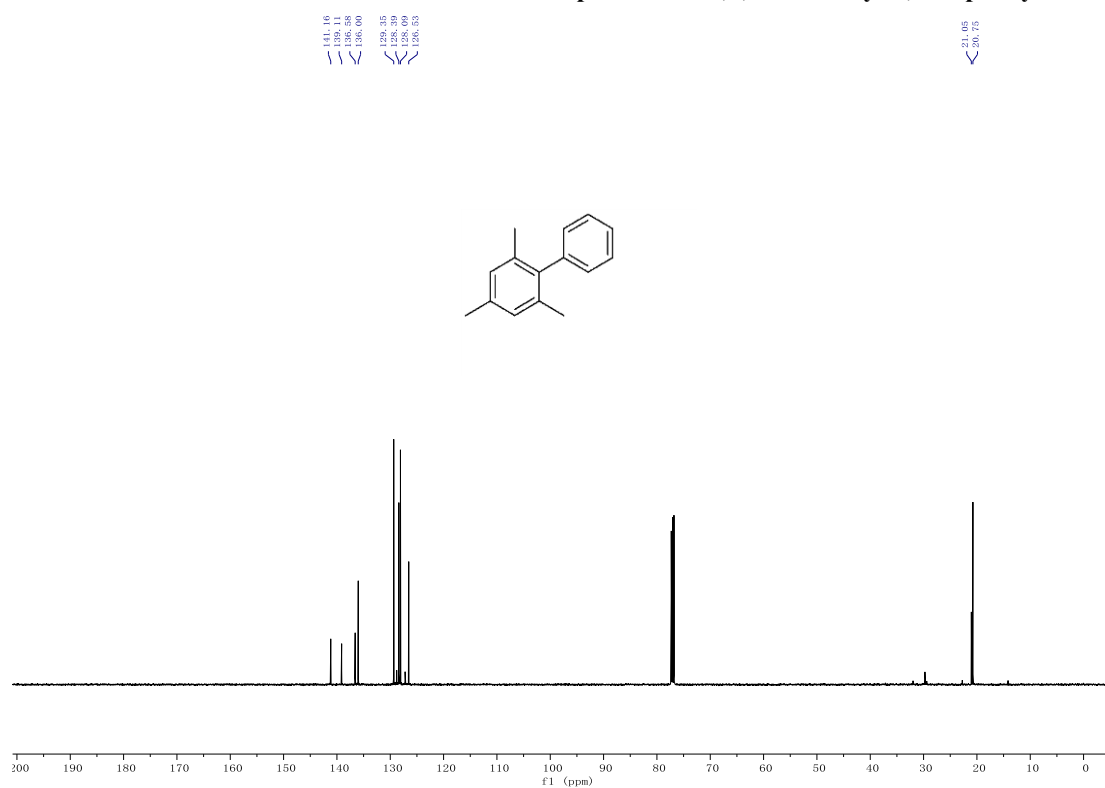

<sup>13</sup>C NMR (126 MHz, Chloroform-*d*) δ 141.56, 141.36, 138.29, 128.96, 128.69, 127.26, 127.13, 125.18, 21.45.

(Table 4, entry 1)

<sup>1</sup>H NMR spectrum of 3-Phenylpyridine

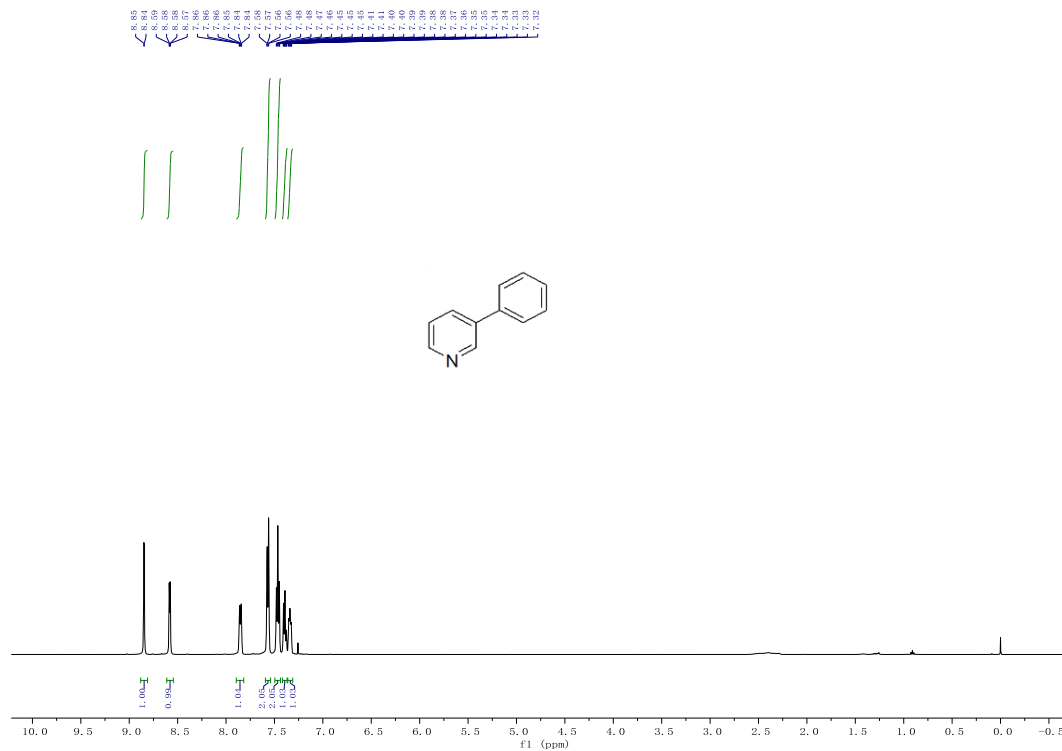

<sup>1</sup>H NMR (500 MHz, Chloroform-d) δ 8.85 (d, J = 2.3 Hz, 1H), 8.58 (dd, J = 4.8, 1.6 Hz, 1H), 7.86 – 7.84 (m, 1H), 7.57 (dd, J = 7.3, 2.0 Hz, 2H), 7.46 (dd, J = 8.6, 6.8 Hz, 2H), 7.42 – 7.37 (m, 1H), 7.36 – 7.32 m, 1H).

<sup>13</sup>C NMR spectrum of 3-Phenylpyridine

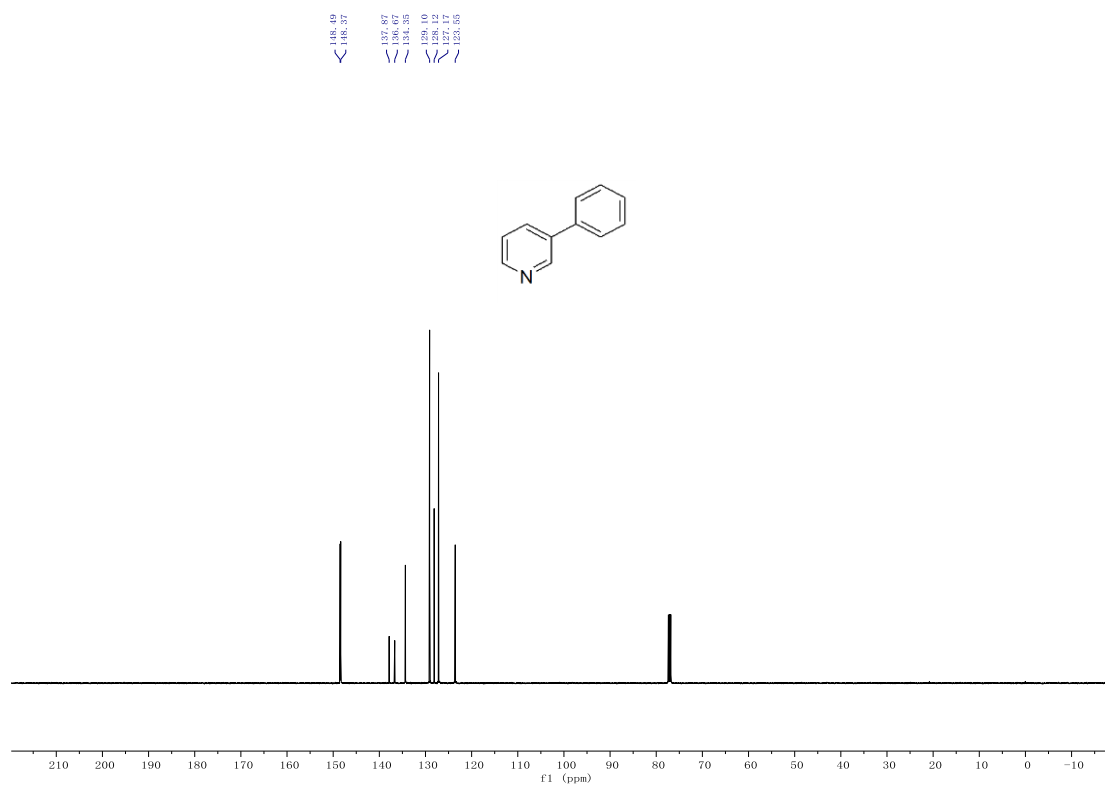

<sup>13</sup>C NMR (126 MHz, Chloroform-d) δ 148.49, 148.37, 137.87, 136.67, 134.35, 129.10, 128.12, 127.17, 123.55.

(Table 4, entry 2)

<sup>1</sup>H NMR spectrum of 2-Phenylpyrazine

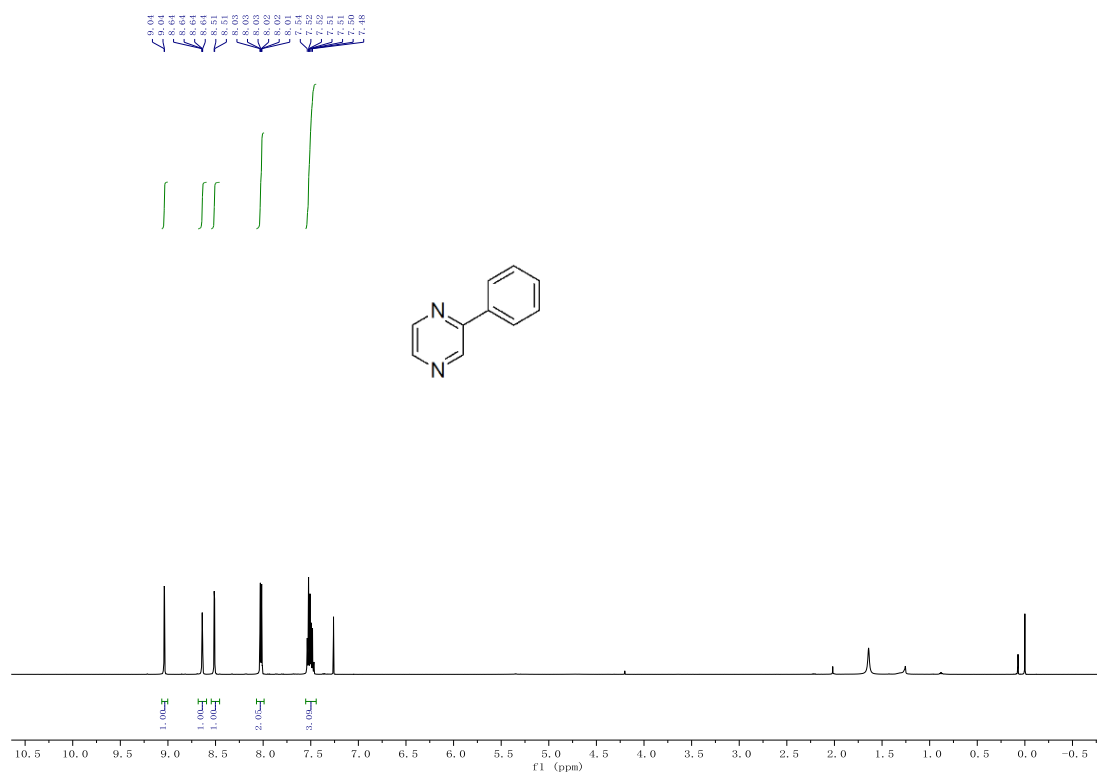

<sup>13</sup>C NMR spectrum of 2-Phenylpyrazine

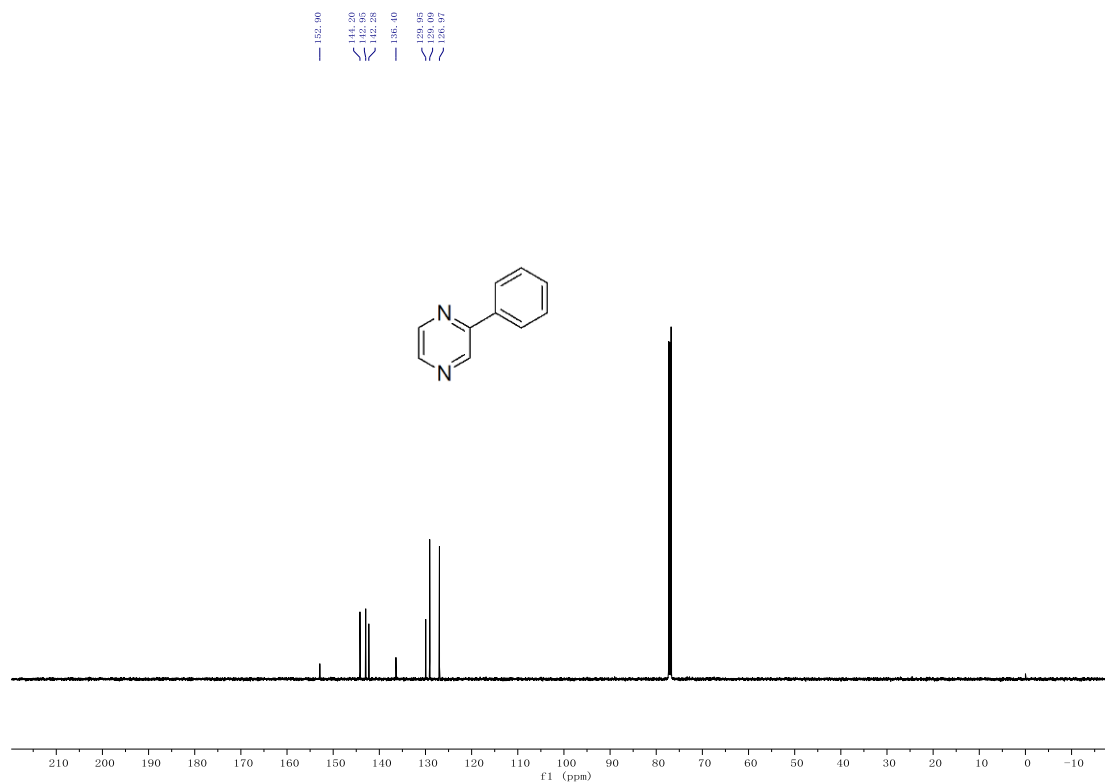

(Table 4, entry 4)

**<sup>1</sup>H NMR spectrum of 3-Phenylthiophene**

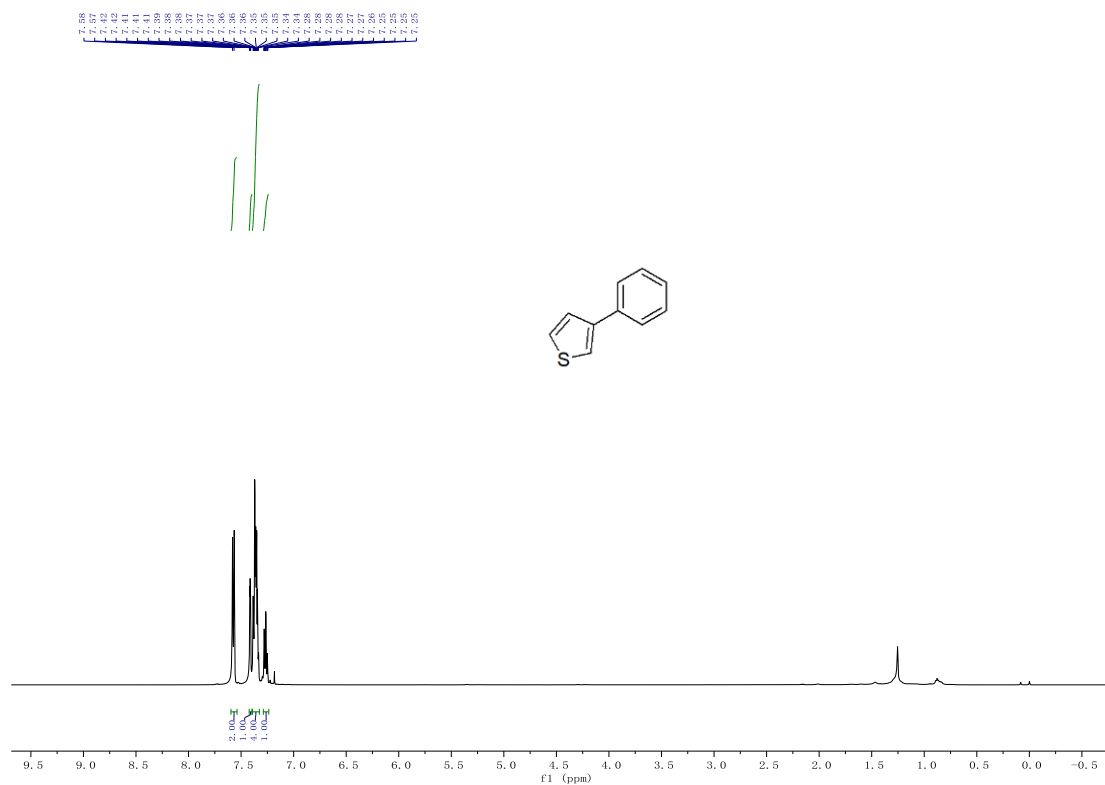

<sup>1</sup>H NMR (500 MHz, Chloroform-*d*) δ 7.57 (d, *J* = 7.4 Hz, 2H), 7.42 – 7.40 (m, 1H), 7.39 – 7.34 (m, 4H), 7.29 – 7.24 (m, 1H).

**<sup>13</sup>C NMR spectrum of 3-Phenylthiophene**

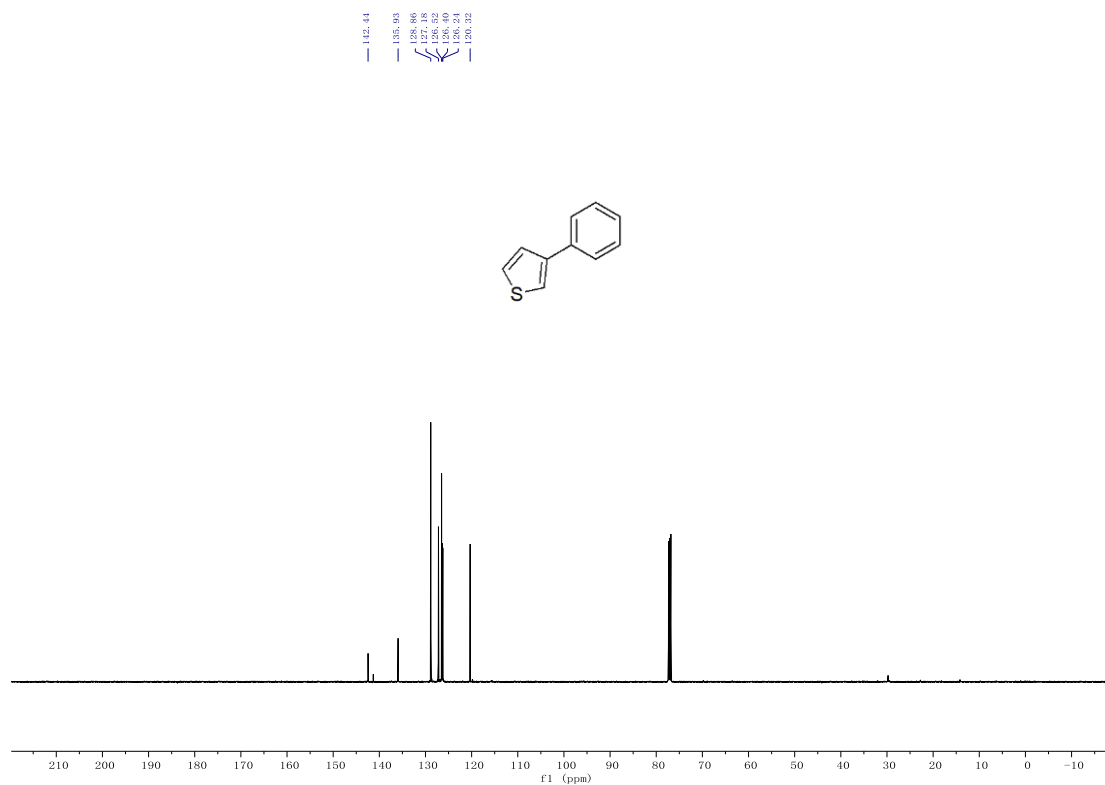

<sup>13</sup>C NMR (126 MHz, Chloroform-*d*) δ 142.4, 135.9, 128.8, 127.1, 126.5, 126.4, 126.2, 120.3.



(Table 4, entry 5)

**<sup>1</sup>H NMR spectrum of 1-Phenylnaphthalene**

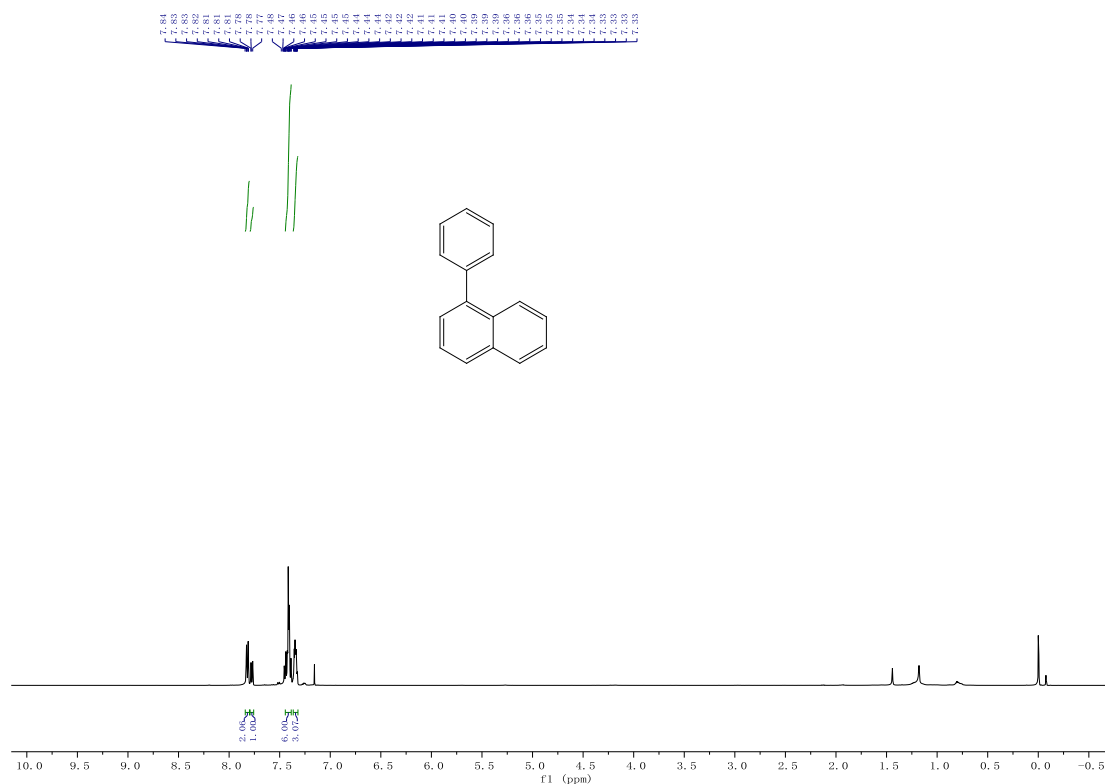

<sup>1</sup>H NMR (500 MHz, Chloroform-*d*)  $\delta$  7.84 – 7.81 (m, 2H), 7.79 – 7.76 (m, 1H), 7.44 – 7.39 (m, 6H), 7.36 – 7.33 (m, 3H).

**<sup>13</sup>C NMR spectrum of 1-Phenylnaphthalene**

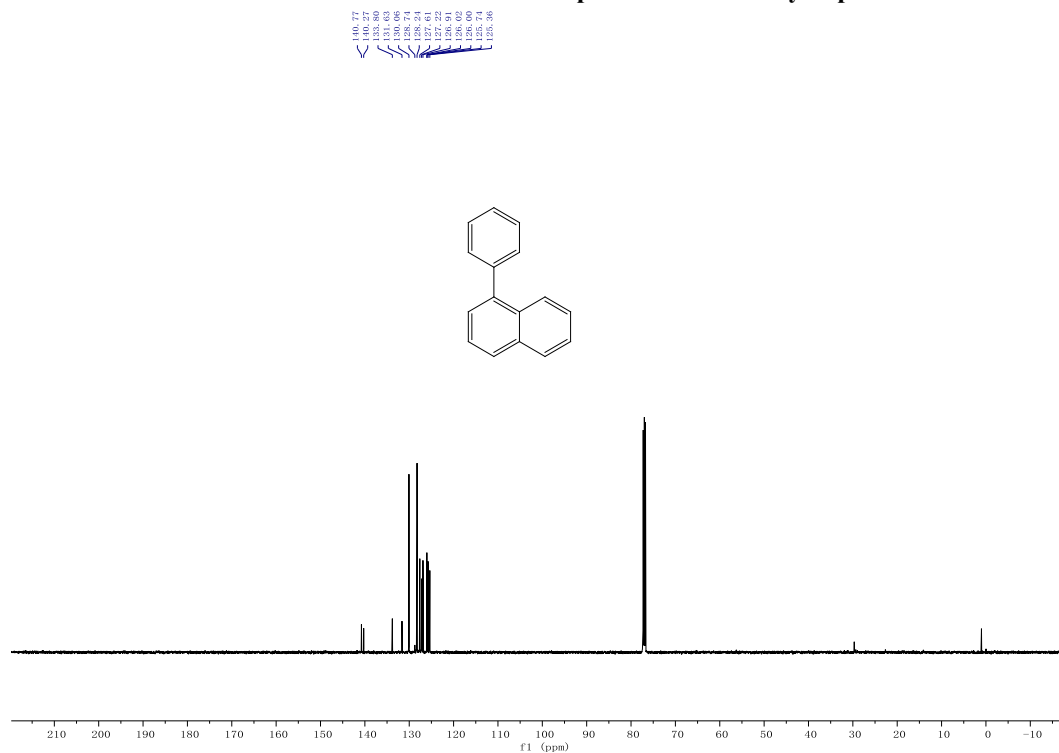

<sup>13</sup>C NMR (126 MHz, Chloroform-*d*)  $\delta$  140.7, 140.2, 133.8, 131.6, 130.1, 128.7, 128.2, 127.6, 127.2, 126.9, 126.0, 126.0, 125.7, 125.3.

(Table 5, entry 6)

<sup>1</sup>H NMR spectrum of 2-Chlorobiphenyl

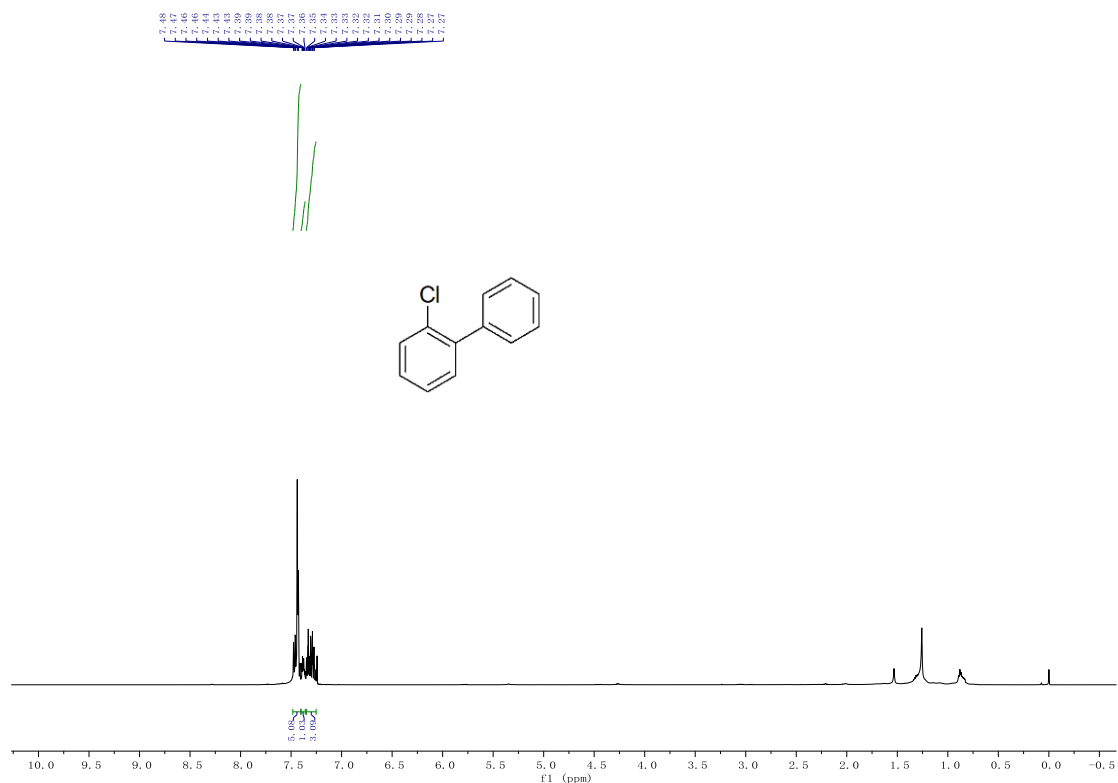

<sup>1</sup>H NMR (500 MHz, Chloroform-*d*)  $\delta$  7.48 – 7.40 (m, 5H), 7.40 – 7.36 (m, 1H), 7.35 – 7.25 (m, 3H).

<sup>13</sup>C NMR spectrum of 2-Chlorobiphenyl

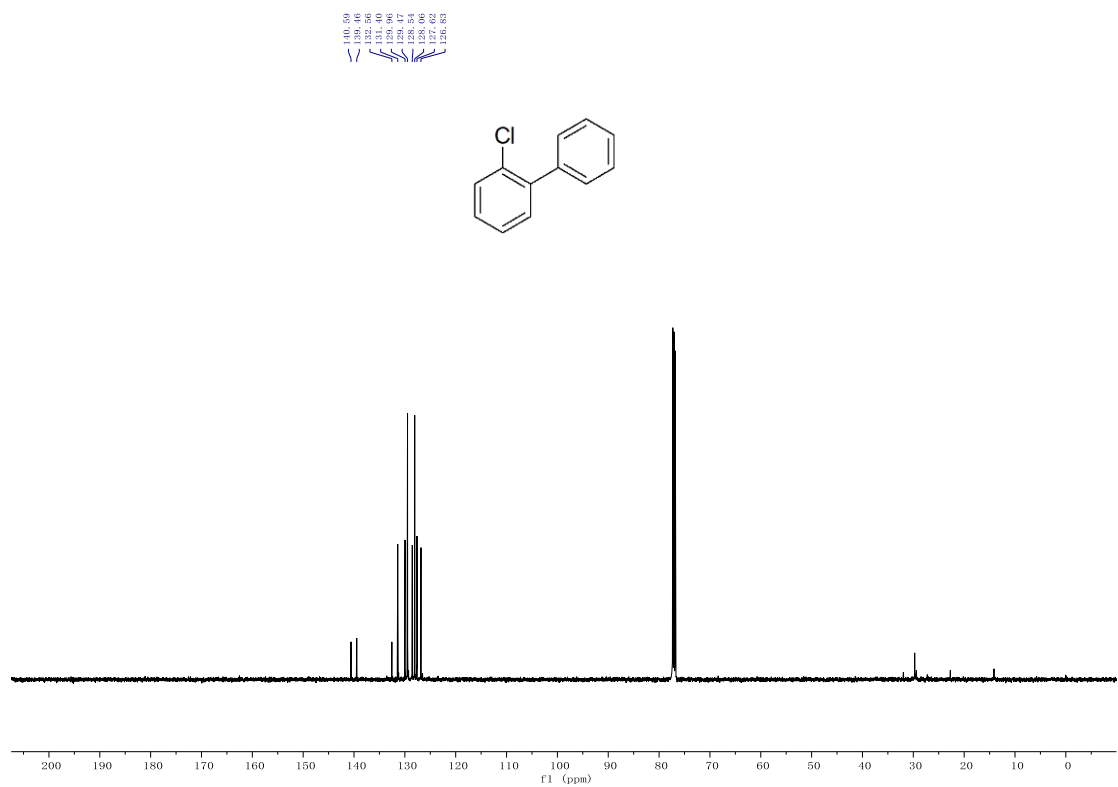

<sup>13</sup>C NMR (126 MHz, Chloroform-*d*)  $\delta$  140.5, 139.4, 132.5, 131.4, 129.9, 129.4, 128.5, 128.1, 127.6, 126.8.

(Table 5, entry 9)

**<sup>1</sup>H NMR spectrum of 5-phenyl-1,3-benzodioxole**

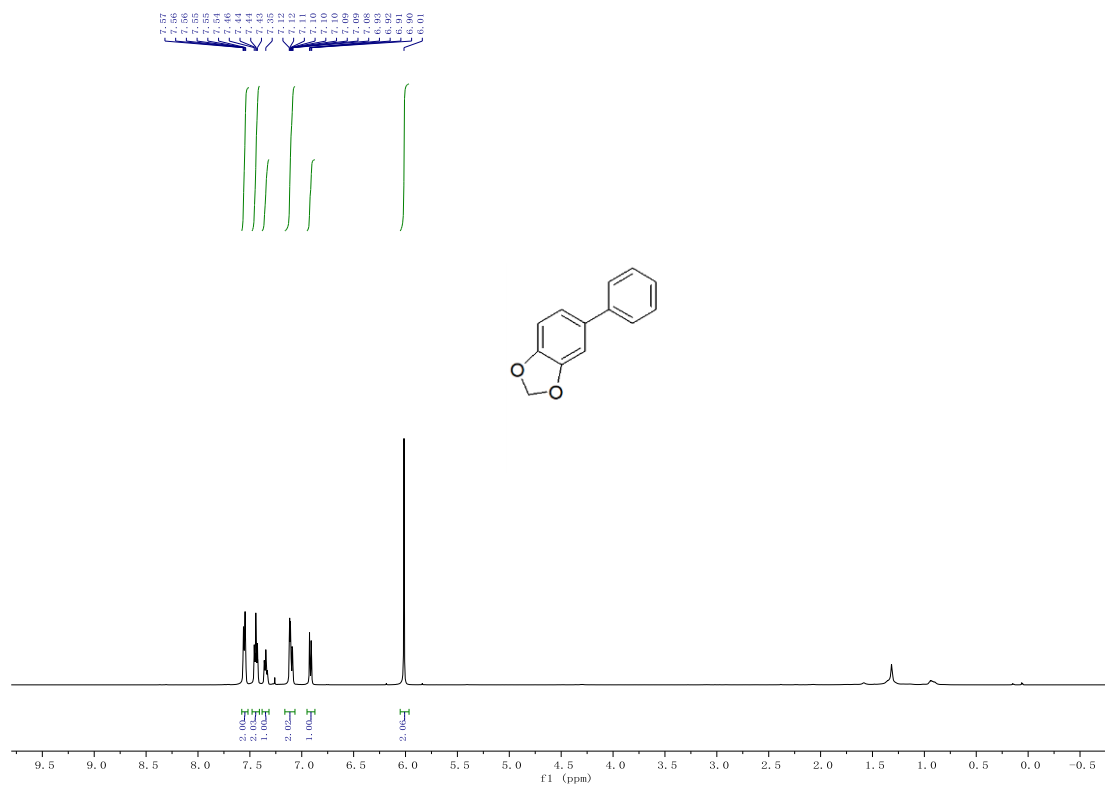

<sup>1</sup>H NMR (500 MHz, Chloroform-*d*) δ 7.57 – 7.54 (m, 2H), 7.48 – 7.41 (m, 2H), 7.35 (s, 1H), 7.16 – 7.07 (m, 2H), 6.93 – 6.90 (m, 1H), 6.01 (s, 2H).

**<sup>13</sup>C NMR spectrum of 5-phenyl-1,3-benzodioxole**

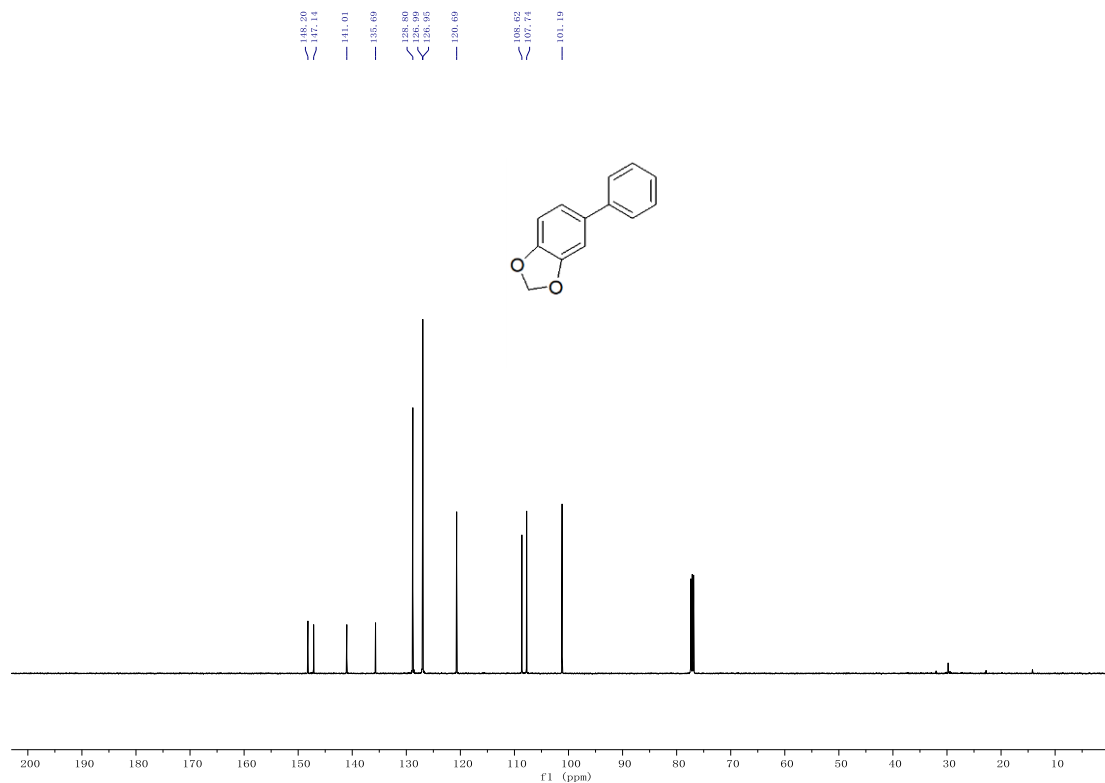

<sup>13</sup>C NMR (126 MHz, Chloroform-*d*) δ 148.2, 147.1, 141.0, 135.6, 128.8, 126.9, 126.9, 120.6, 108.6, 107.7, 101.1.

(Table 5, entry 11)

<sup>1</sup>H NMR spectrum of 3-(thiophen-3-yl)pyridine

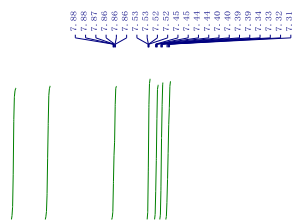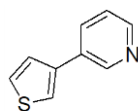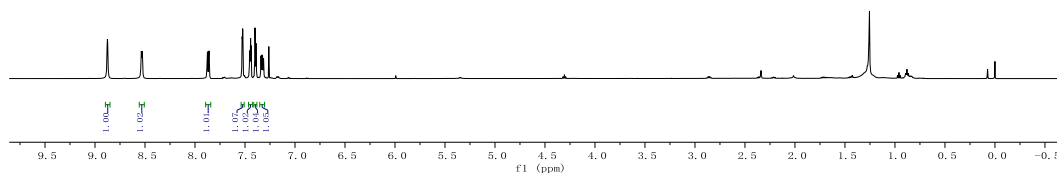

<sup>1</sup>H NMR (500 MHz, Chloroform-*d*)  $\delta$  8.88 (d,  $J = 2.4$  Hz, 1H), 8.56 – 8.51 (m, 1H), 7.88 – 7.86 (m, 1H), 7.52 (dd,  $J = 3.0, 1.4$  Hz, 1H), 7.45 (dd,  $J = 5.0, 3.0$  Hz, 1H), 7.39 (dd,  $J = 5.0, 1.4$  Hz, 1H), 7.33 (dd,  $J = 7.9, 4.8$  Hz, 1H).

<sup>13</sup>C NMR spectrum of 3-(thiophen-3-yl)pyridine

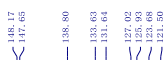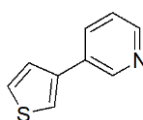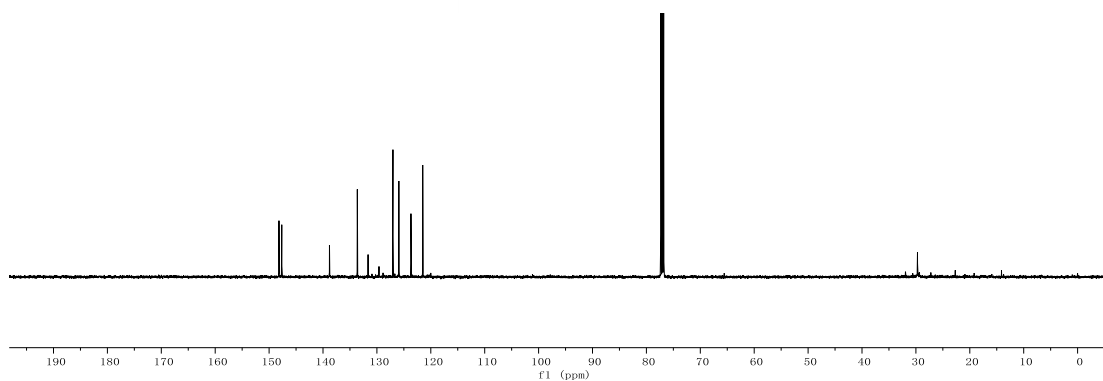

<sup>13</sup>C NMR (126 MHz, Chloroform-*d*)  $\delta$  148.1, 147.6, 138.8, 133.6, 131.6, 127.0, 125.9, 123.6, 121.5.

(Table 5, entry 12)

<sup>1</sup>H NMR spectrum of 3,3'-Bithiophene

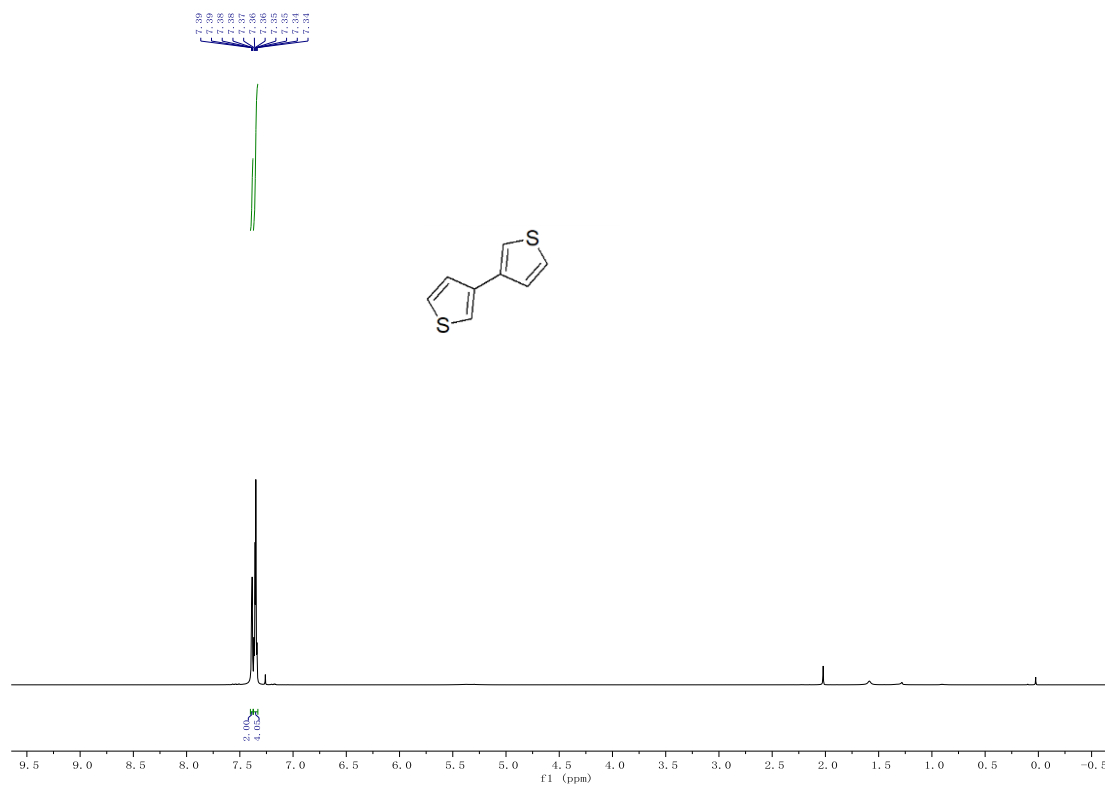

<sup>1</sup>H NMR (500 MHz, Chloroform-*d*)  $\delta$  7.39 (dd,  $J$  = 2.8, 1.4 Hz, 2H), 7.37 – 7.33 (m, 4H).

<sup>13</sup>C NMR spectrum of 3,3'-Bithiophene

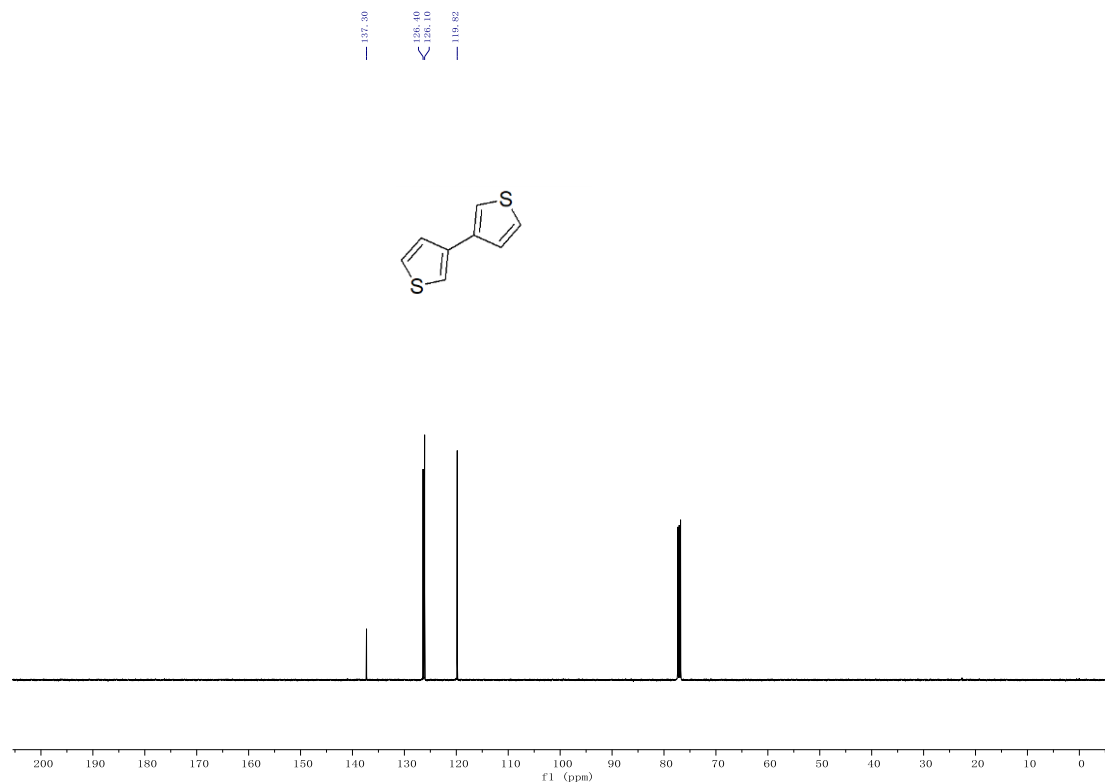

<sup>13</sup>C NMR (126 MHz, Chloroform-*d*)  $\delta$  137.3, 126.4, 126.1, 119.8.

(Table 5, entry 13)

<sup>1</sup>H NMR spectrum of 3-(3,4-methylenedioxyphenyl)pyridine

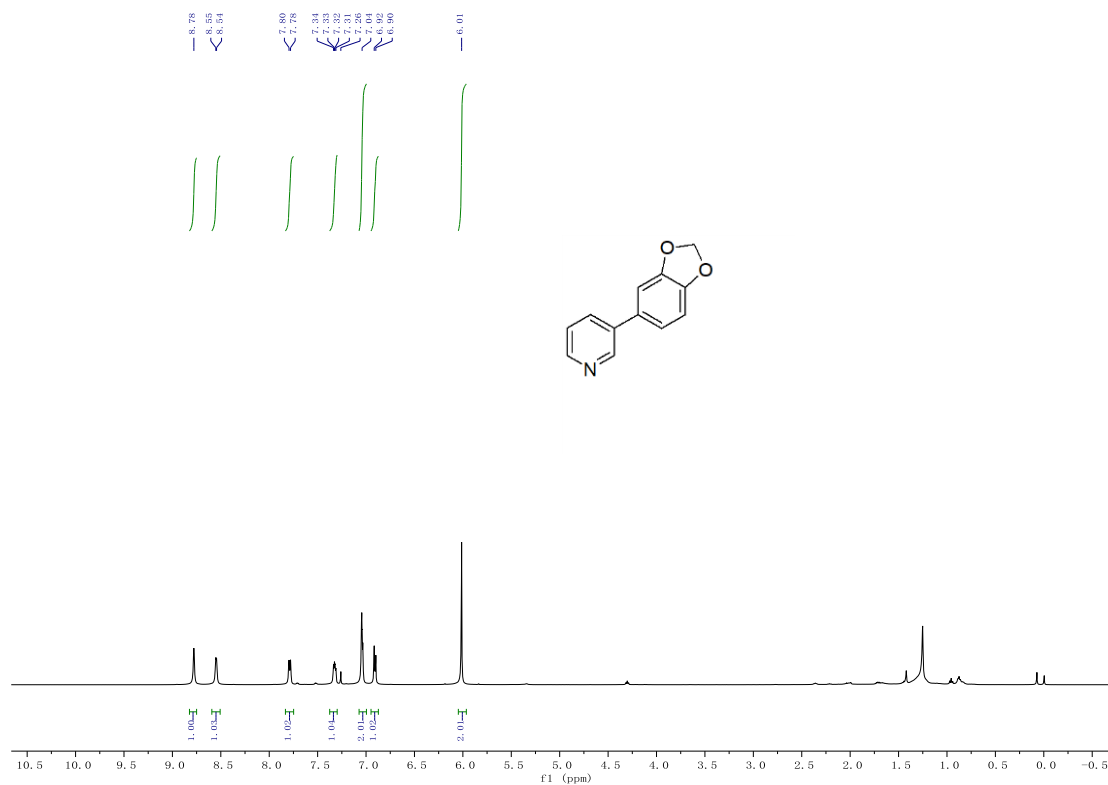

<sup>13</sup>C NMR spectrum of 3-(3,4-methylenedioxyphenyl)pyridine

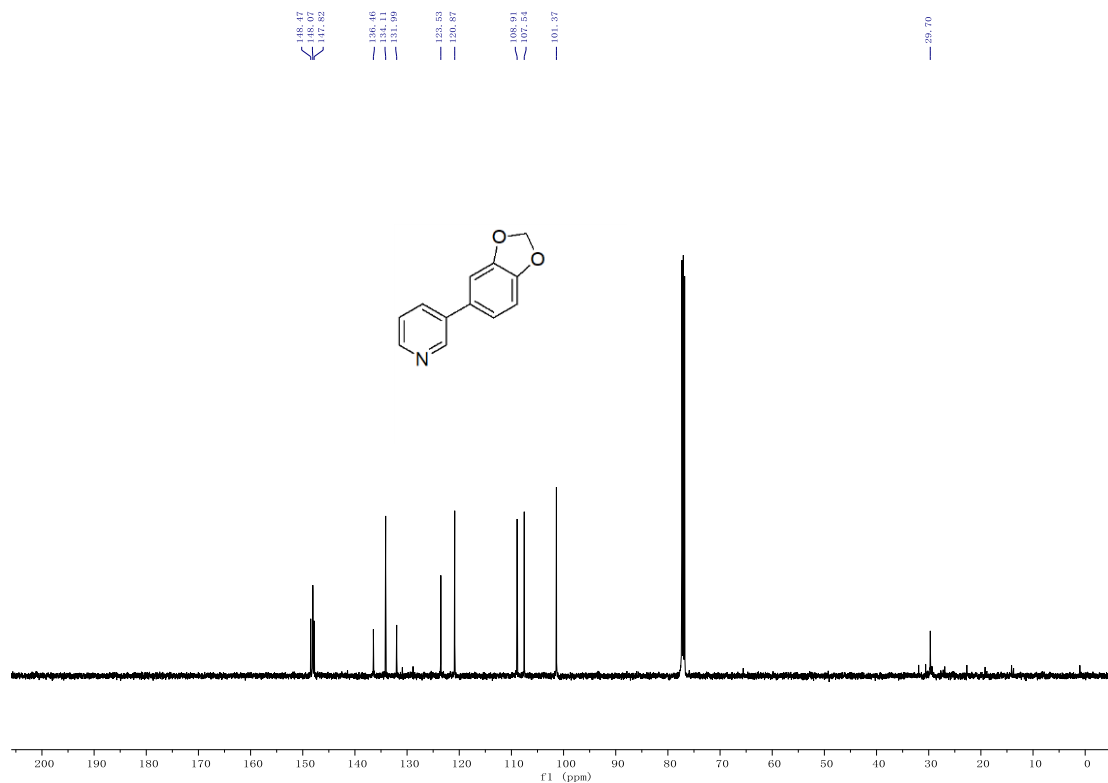

(Table 5, entry 14) <sup>1</sup>H NMR spectrum of 5-(thiophen-3-yl)benzo[d][1,3]dioxole

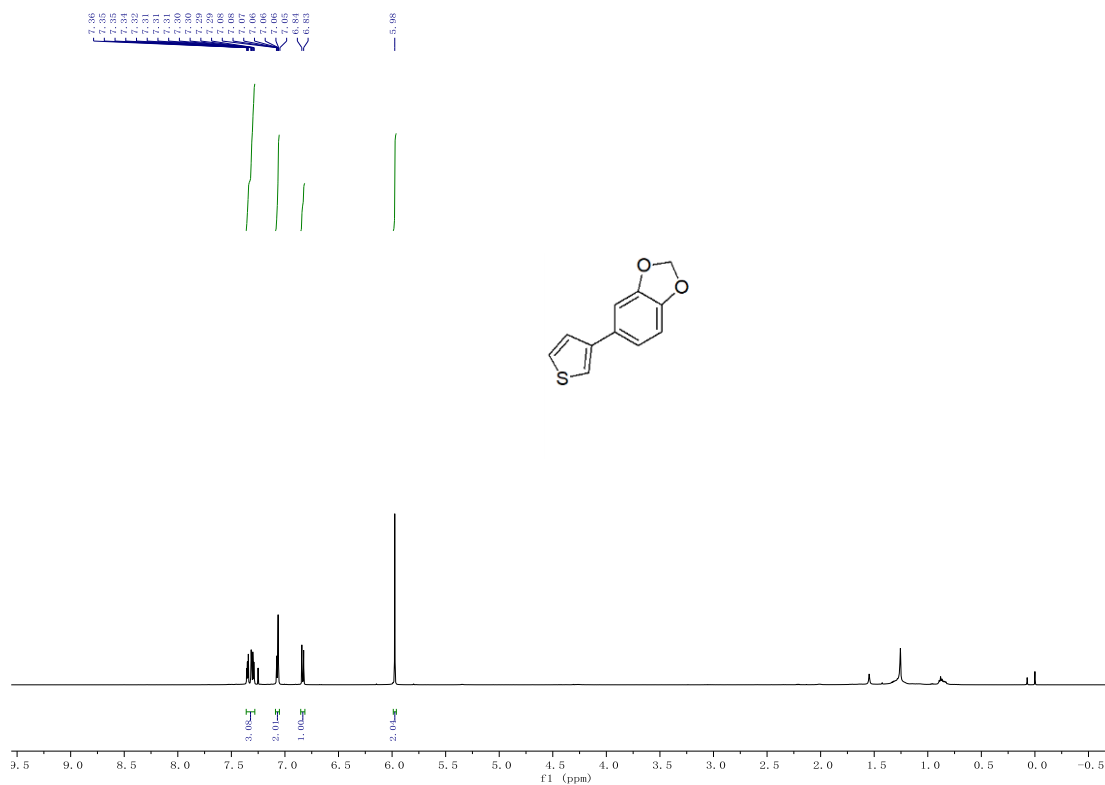

<sup>1</sup>H NMR (500 MHz, Chloroform-*d*)  $\delta$  7.36 – 7.28 (m, 3H), 7.09 – 7.05 (m, 2H), 6.83 (d,  $J = 8.5$  Hz, 1H), 5.98 (s, 2H).

<sup>13</sup>C NMR spectrum of 5-(thiophen-3-yl)benzo[d][1,3]dioxole

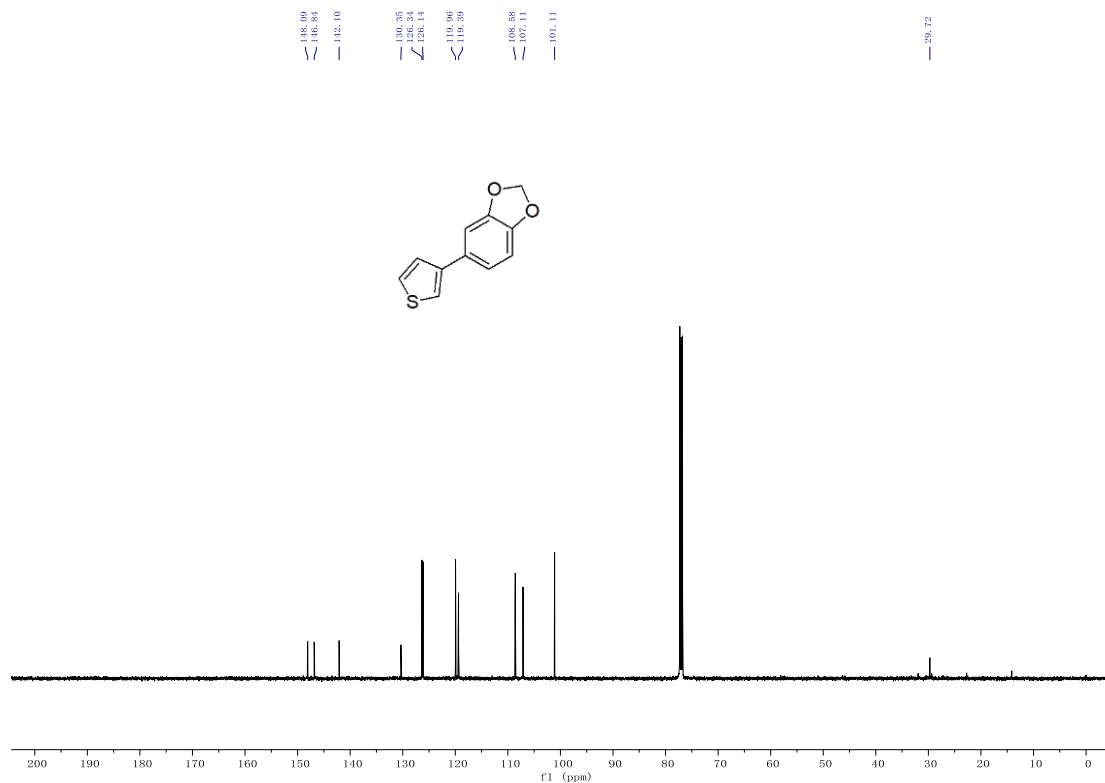

<sup>13</sup>C NMR (126 MHz, Chloroform-*d*)  $\delta$  148.1, 146.8, 142.1, 130.3, 126.3, 126.1, 119.9, 119.3, 108.5, 107.1, 101.1, 29.7.

**Scheme S1 <sup>1</sup>H NMR spectrum of 2-(2-Iodophenyl)benzo[d]thiazole**

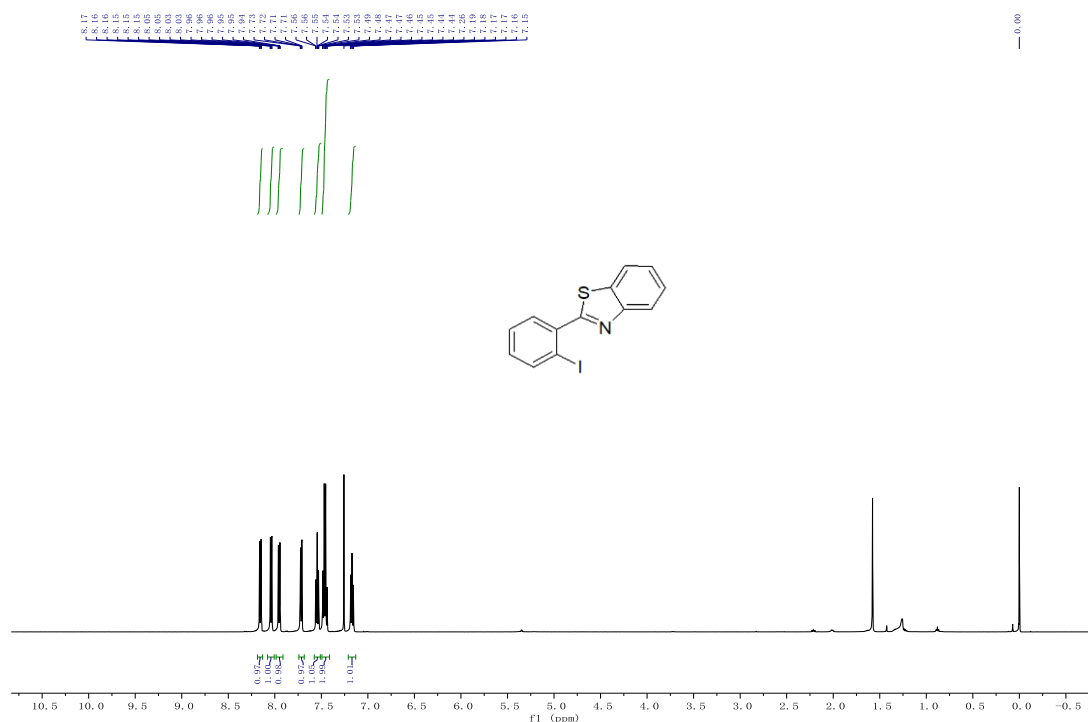

<sup>1</sup>H NMR (500 MHz, Chloroform-d) δ ppm 8.17 – 8.15 (m, 1H), 8.04 (dd, J = 8.0, 1.2 Hz, 1H), 7.96 – 7.94 (m, 1H), 7.72 (dd, J = 7.7, 1.7 Hz, 1H), 7.56 – 7.53 (m, 1H), 7.51 – 7.42 (m, 2H), 7.19 – 7.15 (m, 1H).

**<sup>13</sup>C NMR spectrum of 2-(2-Iodophenyl)benzo[d]thiazole**

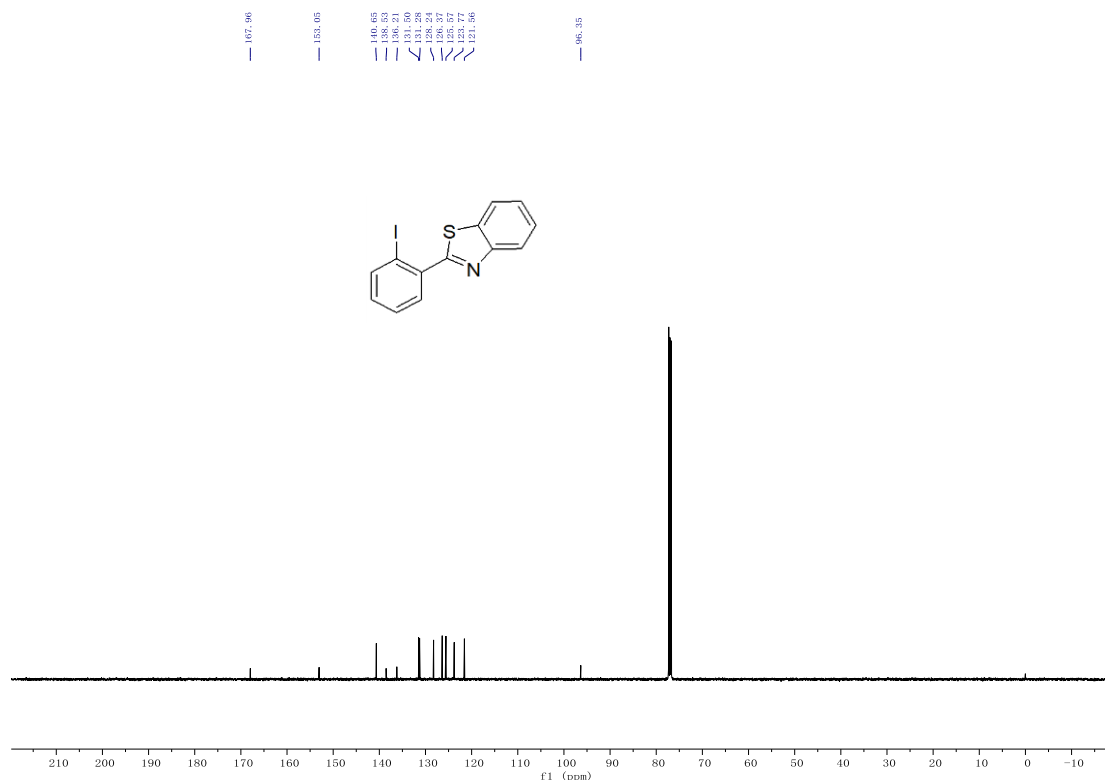

<sup>13</sup>C NMR (126 MHz, Chloroform-d) δ 167.9, 153.1, 140.7, 138.5, 136.2, 131.5, 131.3, 128.2, 126.4, 125.6, 123.8, 121.6, 96.4.



Scheme 2

<sup>1</sup>H NMR spectrum of 2-[1,1'-Biphenyl]-2-ylbenzothiazole

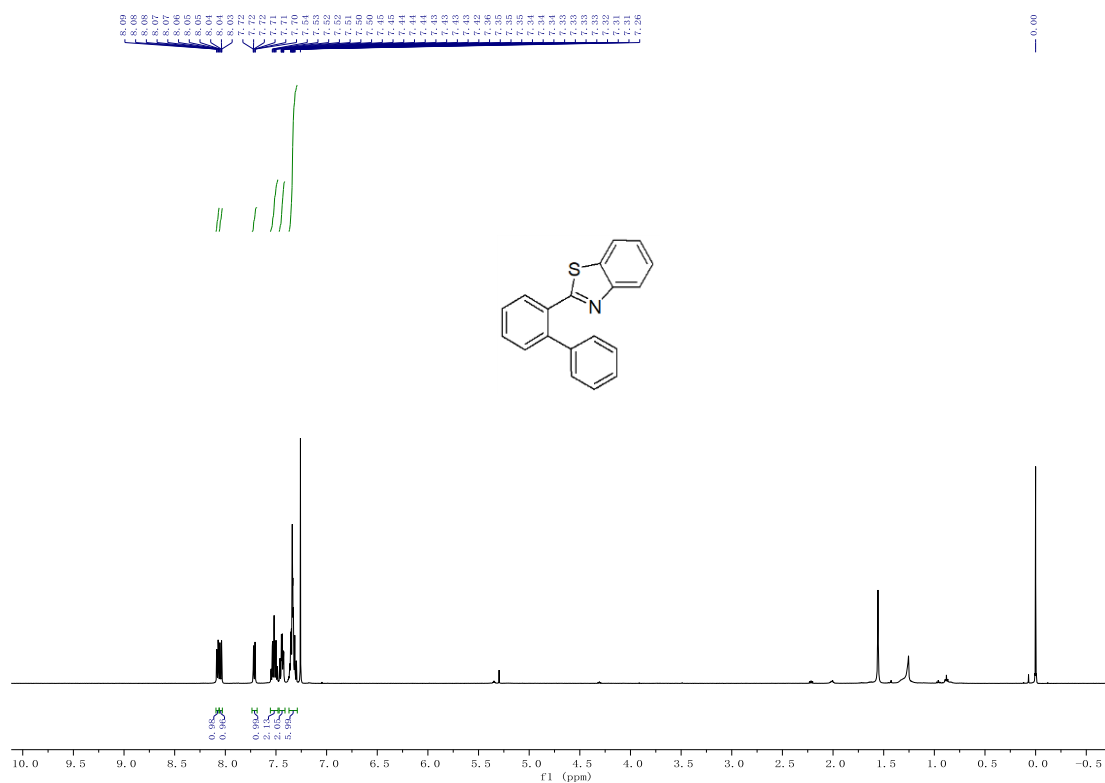

<sup>1</sup>H NMR (500 MHz, Chloroform-d) δ ppm 8.09 – 8.06 (m, 1H), 8.05 – 8.03 (m, 1H), 7.72 – 7.70 (m, 1H), 7.54 – 7.50 (m, 2H), 7.47 – 7.41 (m, 2H), 7.38 -7.29 (m, 6H).

<sup>13</sup>C NMR spectrum of 2-[1,1'-Biphenyl]-2-ylbenzothiazole

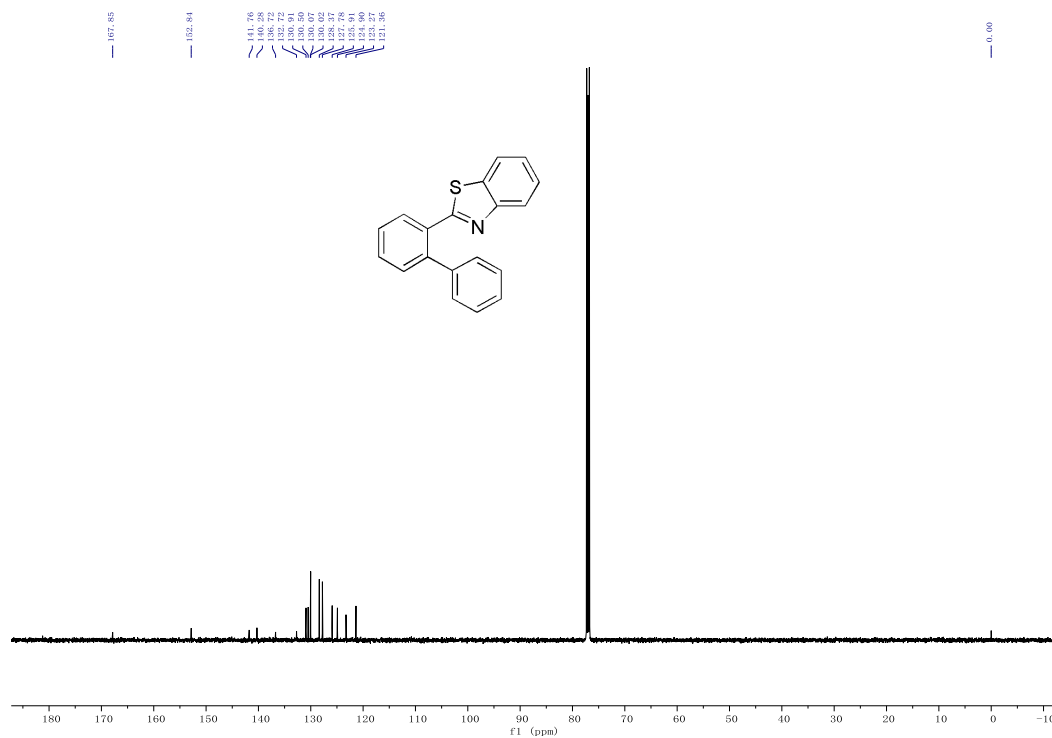

<sup>13</sup>C NMR (126 MHz, Chloroform-d) δ 167.9, 152.8, 141.8, 140.3, 136.7, 132.7, 130.9, 130.5, 130.1, 130.0, 128.4, 127.8, 125.9, 124.9, 123.3, 121.4.

## 10. References

1. P. A. Deyris, T. Cañeque, Y. Wang, P. Retailleau, F. Bigi, R. Maggi and M. Malacria, *ChemCatChem*, 2015, **7**, 3266-3269.
2. Y. Wang, A. Monfredini, P. A. Deyris, F. Blanchard, E. Derat, G. Maestri and M. Malacria, *Chem.-Eur. J.*, 2015, **8**, 7394-7402.
3. Y. Wang, A. Monfredini, P. A. Deyris, F. Blanchard, E. Derat, G. Maestri and M. Malacria, *Chem. Sci.*, 2017, **8**, 7394-7402.
4. H. Liu, X. Li, F. Liu, Y. Tan and Y. Jiang, *J. Organomet. Chem.*, 2015, **794**, 27-32.
5. Y. X. Luan, T. Zhang, W. W. Yao, L. Ke, L. Y. Kong and Y. T. Lin, *J. Am. Chem. Soc.*, 2017, **139**, 1786-1789.
6. A. Ohtsuki, K. Yanagisawa, T. Furukawa, M. Tobisu and N. Chatani, *J. Org. Chem.*, 2016, **81**, 9409-9414.
7. W. C. Shih, Y. T. Chiang, Q. Wang, M. C. Wu, G. P. Yap, L. Zhao and T. G. Ong, *Organometallics*, 2017, **36**, 4287-4297.
8. S. H. Gund, K. E. Balsane and J. M. Nagarkar, *Tetrahedron*, 2016, **72**, 5051-5056.
9. T. Zhou, P. P. Xie, C. L. Ji, X. Hong and M. Szostak, *Org. Lett.*, 2020, **22**, 6434-6440.
10. M. A. Nasser, M. Kazemnejadi, A. Allahresani and M. HussainZadeh, *New. J. Chem.*, 2021, **45**, 7741-7757.
11. Z. Hu, X. J. Wei, J. Handelsmann, A. K. Seitz, I. Rodstein, V. H. Gessner and L. J. Gooßen, *Angew. Chem. Int. Ed.*, 2021, **60**, 6778-6783.
12. A. Ghorbani-Choghamarani, P. Moradi and B. Tahmasbi, *J. Iran. Chem. Soc.*, 2019, **16**, 511-521.
13. M. Blanco, D. Mosconi, C. Tubaro, A. Biffis, D. Badocco, P. Pastore and G. Granozzi, *Green Chem*, 2019, **21**, 5238-5247.
14. S. Thapa, P. Basnet, S. K. Gurung and R. Giri, *ChemComm*, 2015, **51**, 4009-4012.
15. G. Liu, F. Han, C. Liu, H. Wu, Y. Zeng and R. Zhu, *Organometallics*. 2019, **38**, 1459-1467
16. S. R. Aabaka, J. Mao, M. Lavanya, K. Venkateswarlu, Z. Huang, J. Mao and C. Lin, *J. Organomet. Chem.*, 2021, **937**, 121719.
17. N. Dwadnia, J. Roger, N. Pirio, Hélène Cattey, R. Ben Salem and J. C. Hierro, *Chem. Asian. J.*,

- 2017, **12**, 459-464.
18. M. J. Jin and D. H. Lee, *Angew. Chem. Int. Ed.*, 2010, **49**, 1119-1122.
19. Y. B. Zhou, C. Y. Li, M. Lin, Y. J. Ding and Z. P. Zhan, *Adv. Synth. Catal.*, 2015, **11**, 2503-2508.
20. S. T. Keaveney and F. Schoenebeck, *Angew. Chem. Int. Ed.*, 2018, **57**, 4073-4077.
21. H. Zhao, J. Shen, C. Ren, W. Zeng and H. Zeng, *Org. Lett.*, 2017, **19**, 2190-2193.
22. W. B. Chen, C. H. Xing, J. Dong and Q. S. Hu, *Adv. Synth. Catal.*, 2016, **358**, 2072-2076.
23. S. Chakraborty, J. Ahmed, B. K. Shaw, A. Jose and S. K. Mandal, *Chem. Eur. J.*, 2018, **24**, 17651-17655.
24. X. Chen, L. Zhou, Y. Li, T. Xie and S. Zhou, *J. Org. Chem.*, 2014, **79**, 230-239.
25. X. Y. Hua, J. Masson-Makdissi, R. J. Sullivan and S. G. Newman, *Org. Lett.*, 2016, **18**, 5312-5315.
26. L. Yadav, M. K. Tiwari, B. R. K. Shyamlal and S. Chaudhary, *J. Org. Chem.*, 2020, **85**, 8121-8141.
27. Q. Yang, F. Yang, Y. Zhang, J. Hou, J. Li, J. Cheng and H. Shi, *J. Organomet. Chem.*, 2021, **933**, 121656.
28. Y. Liu, J. Wang, T. Li, Z. Zhao and W. Pang, *Tetrahedron*, 2019, **75**, 130540.
29. R. R. Guerra, F. C. Martins, C. G. Lima, R. H. Goncalves, E. R. Leite, E. R. Pereira-Filho and R. S. Schwab, *Tetrahedron Lett*, 2017, **58**, 903-908.
30. P. Quagliotto, N. Barbero, C. Barolo, R. Buscaino, P. Carfora, S. Prosperini Visc and G. ardi, *Dyes Pigm*, 2017, **137**, 468-479.
31. R. Adam, M. Mon, R. Greco, L. Kalinke, A. Vidal-Moya and A. Fernandez. *J. Am. Chem. Soc.*, 2019, **141**, 10350-10360.
32. N. A. Laberge and J. A. Love, *Eur. J. Org. Chem.*, 2015, **2015**, 5546-5553.
33. D. H. Li, X. X. He, C. Xu, F. D. Huang and F. S. Liu, *Organometallics*, 2019, **38**, 2539-2552.
34. C. Liu, Q. Ni, F. Bao and J. Qiu, *Green Chem*, 2011, **13**, 1260-1266.
35. A. Ohtsuki, K. Yanagisawa, T. Furukawa, M. Tobisu and N. Chatani, *J. Org. Chem.*, 2016, **81**, 9409-9414.
36. Q. Ding, H. Ji, D. Wang, Y. Lin, W. Yu and Y. Peng, *J. Organomet. Chem.*, 2012, **711**, 62-67.
